# Supplementary material for: Transcriptomic analysis reveals candidate genes for male sterility in Prunus sibirica
Source: PeerJ journal article supplement (doi:10.7717/peerj.12349), 2021-10-20

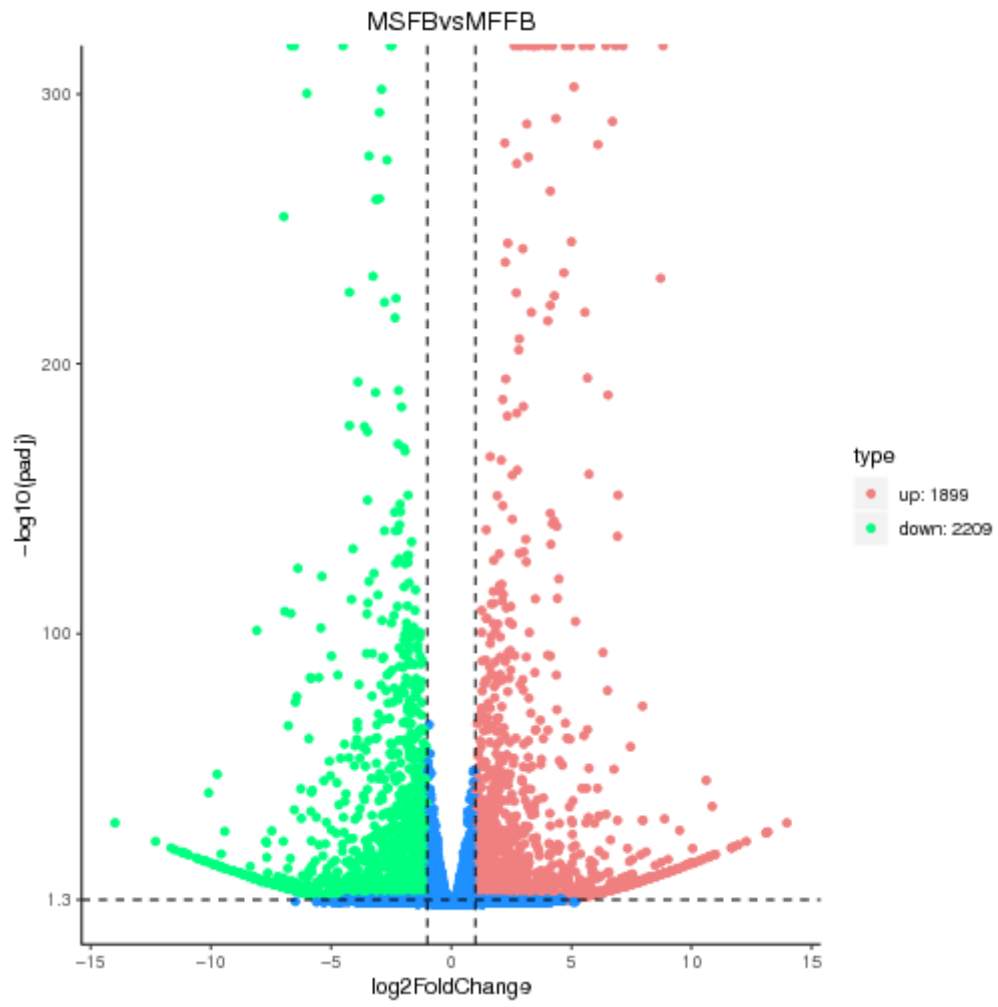

Supplement: Fig._S1.pdf [file Fig._S1.pdf]
