# Supplementary material for: Transcriptomic analysis reveals candidate genes for male sterility in Prunus sibirica
Source: PeerJ journal article supplement (doi:10.7717/peerj.12349), 2021-10-20
Supplement: Fig._S2.pdf [file Fig._S2.pdf]

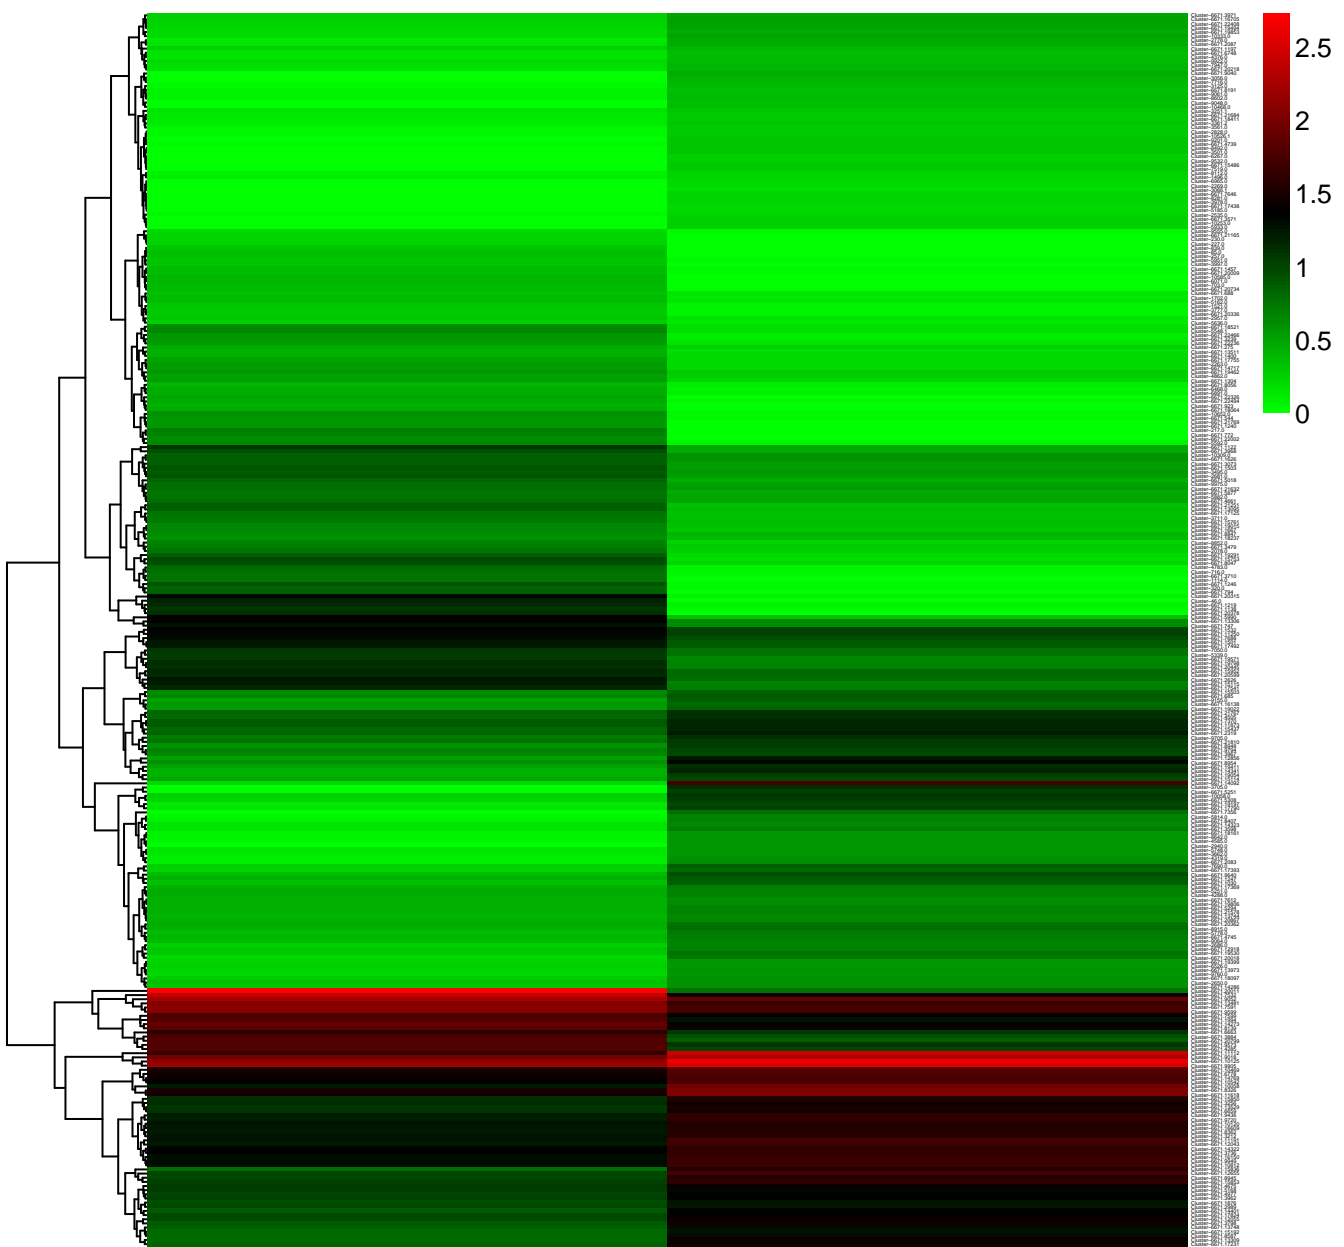

MSFB

MFFB
