# Supplementary material for: Transcriptomic analysis reveals candidate genes for male sterility in Prunus sibirica
Source: PeerJ. 2021 Oct 20;9:e12349. doi: 10.7717/peerj.12349 (PMC8541319; doi:10.7717/peerj.12349)
Supplement: Supplemental Information 9 [file peerj-09-12349-s009.xlsx]

## Sheet: Sheet1
Table S6 Detailed information of differentially expressed genes in GO functional enrichment analysis
gene_id	sample_readcount(MSFB_1)	sample_readcount(MSFB_2)	sample_readcount(MSFB_3)	sample_readcount(MFFB_1)	sample_readcount(MFFB_2)	sample_readcount(MFFB_3)	sample_fpkm(MSFB_1)	sample_fpkm(MSFB_2)	sample_fpkm(MSFB_3)	sample_fpkm(MFFB_1)	sample_fpkm(MFFB_2)	sample_fpkm(MFFB_3)	Gene Length	NR GI	NR ID	NR Score	NR Evalue	NR Description	NT GI	NT ID	NT Score	NT Evalue	NT Description	KO ID	KO Name	KO Description	Http Link	Swissprot ID	Swissprot Score	Swissprot Evalue	Swissprot Description	PFAM ID	PFAM description	Gene Ontology Biological Pathway	BP Description	Gene Ontology Molecular Function	MF Description	Gene Ontology Cellular Component	CC Description	KOG ID	KOG Description	UP_DOWN_REGULATION(MSFBvsMFFB)	log2FC(MSFBvsMFFB)	q value(MSFBvsMFFB)	CDS_flag	Category
Cluster-10253.0	0	0	0	9	7	7	0	0	0	0.91	0.67	0.78	678	3501176	XP_008233513.1	772	1.2e-79	PREDICTED: wall-associated receptor kinase 3-like [Prunus mume]	XM_008235291.2	XM_008235291	576	0	PREDICTED: Prunus mume wall-associated receptor kinase 3-like (LOC103332550), mRNA	--	--	--	--	Q9LMP1	278	1.1e-23	Wall-associated receptor kinase 2 OS=Arabidopsis thaliana OX=3702 GN=WAK2 PE=1 SV=1	PF07714//PF00069	Protein tyrosine kinase//Protein kinase domain	GO:0006468	protein phosphorylation	GO:0005524//GO:0004672	ATP binding//protein kinase activity	--	--	--	--	DOWN	-5.0163	0.0067747	estscan,start:1 end:678	Category 1
Cluster-10309.0	138	173	178	119	109	82	5.7	6.49	6.22	3.26	2.84	2.45	1787	10943556	XP_024190966.1	1707	1.2e-187	probable protein kinase At2g41970 isoform X1 [Rosa chinensis]	XM_008242677.2	XM_008242677	1529	0	PREDICTED: Prunus mume probable protein kinase At2g41970 (LOC103339394), mRNA	--	--	--	--	P93749	1513	1.8e-166	Probable protein kinase At2g41970 OS=Arabidopsis thaliana OX=3702 GN=At2g41970 PE=2 SV=1	PF00069//PF07714	Protein kinase domain//Protein tyrosine kinase	GO:0006468	protein phosphorylation	GO:0005524//GO:0004672	ATP binding//protein kinase activity	--	--	--	--	UP	1.0238	1.8834e-06	blast,frame:2 start:410 end:1510	Category 1
Cluster-10333.0	0	4	6	21	15	14	0	0.72	1.01	2.71	1.83	1.98	588	3498803	XP_008230111.1	631	2.4e-63	PREDICTED: calcium-binding protein PBP1-like [Prunus mume]	XM_008231889.2	XM_008231889	579	0	PREDICTED: Prunus mume calcium-binding protein PBP1-like (LOC103329417), mRNA	--	--	--	--	Q9LSQ6	335	2.3e-30	Calcium-binding protein PBP1 OS=Arabidopsis thaliana OX=3702 GN=PBP1 PE=1 SV=1	PF13202//PF12763//PF13833//PF00036//PF13405	EF hand//Cytoskeletal-regulatory complex EF hand//EF-hand domain pair//EF hand//EF-hand domain	--	--	GO:0005515//GO:0005509	protein binding//calcium ion binding	--	--	KOG0028	Ca2+-binding protein (centrin/caltractin), EF-Hand superfamily protein	DOWN	-1.9903	0.048688	blast,frame:-1 start:447 end:70	Category 1
Cluster-10468.0	0	0	0	28	22	14	0	0	0	1.73	1.29	0.95	942	10394953	POE50132.1	184	2.6e-11	s-adenosylmethionine mitochondrial carrier protein [Quercus suber]	--	--	--	--	--	--	--	--	--	Q5AD07	252	1.5e-20	Cell surface Cu-only superoxide dismutase 5 OS=Candida albicans (strain SC5314 / ATCC MYA-2876) OX=237561 GN=SOD5 PE=1 SV=1	PF00080	Copper/zinc superoxide dismutase (SODC)	GO:0006801//GO:0055114	superoxide metabolic process//oxidation-reduction process	GO:0046872	metal ion binding	--	--	--	--	DOWN	-6.4829	1.1392e-05	blast,frame:-1 start:942 end:22	Category 1
Cluster-10526.1	2	1	0	13.04	18	8	0.23	0.1	0	0.98	1.28	0.66	823	7883639	ONI34223.1	1051	6.6e-112	hypothetical protein PRUPE_1G469000 [Prunus persica]	XM_016791740.1	XM_016791740	639	0	PREDICTED: Prunus mume cysteine-rich receptor-like protein kinase 26 (LOC107880398), mRNA	--	--	--	--	O65468	521	8.6e-52	Cysteine-rich receptor-like protein kinase 8 OS=Arabidopsis thaliana OX=3702 GN=CRK8 PE=3 SV=2	PF07714//PF00069	Protein tyrosine kinase//Protein kinase domain	GO:0006468	protein phosphorylation	GO:0004672//GO:0005524	protein kinase activity//ATP binding	--	--	--	--	DOWN	-3.2921	0.015044	blast,frame:3 start:3 end:620	Category 1
Cluster-10585.0	39	79	52	2	0	0	1.13	2.09	1.28	0.04	0	0	2421	7881328	ONI31912.1	3513	0	hypothetical protein PRUPE_1G338600 [Prunus persica]	XM_007226282.1	XM_007226282	1912	0	Prunus persica hypothetical protein (PRUPE_ppa022178mg) mRNA, complete cds	--	--	--	--	Q9FMS5	1659	2.8e-183	PHD finger protein MALE STERILITY 1 OS=Arabidopsis thaliana OX=3702 GN=MS1 PE=1 SV=1	PF00628//PF04272	PHD-finger//Phospholamban	GO:0006810//GO:0006816	transport//calcium ion transport	GO:0042030//GO:0005515//GO:0005246	ATPase inhibitor activity//protein binding//calcium channel regulator activity	GO:0016020	membrane	--	--	UP	6.7714	5.9605e-09	blast,frame:-1 start:2361 end:163	Category 1
Cluster-10652.0	45	55	52	2	3	2	2.76	3.04	2.68	0.08	0.11	0.09	1300	9098186	XP_021833745.1	1175	4.4e-126	mitogen-activated protein kinase kinase kinase 1-like [Prunus avium]	XM_008230600.1	XM_008230600	1029	0	PREDICTED: Prunus mume mitogen-activated protein kinase kinase kinase 1-like (LOC103328204), mRNA	--	--	--	--	Q9ZVP5	404	5e-38	Mitogen-activated protein kinase kinase kinase 18 OS=Arabidopsis thaliana OX=3702 GN=MAPKKK18 PE=1 SV=1	PF07714//PF00069//PF05445	Protein tyrosine kinase//Protein kinase domain//Poxvirus serine/threonine protein kinase	GO:0006468	protein phosphorylation	GO:0004672//GO:0005524	protein kinase activity//ATP binding	--	--	--	--	UP	4.8098	2.2797e-12	blast,frame:1 start:76 end:1188	Category 1
Cluster-1114.0	134	124	140	0	3	0	5.23	4.39	4.62	0	0.07	0	1876	3494305	XP_008223759.1	2131	8.8e-237	PREDICTED: rust resistance kinase Lr10-like isoform X1 [Prunus mume]	XM_008225542.2	XM_008225542	1327	0	PREDICTED: Prunus mume rust resistance kinase Lr10-like (LOC103323541), transcript variant X4, mRNA	--	--	--	--	P93604	728	2e-75	Rust resistance kinase Lr10 OS=Triticum aestivum OX=4565 GN=LRK10 PE=2 SV=1	PF07714//PF00069	Protein tyrosine kinase//Protein kinase domain	GO:0006468	protein phosphorylation	GO:0004672//GO:0005524	protein kinase activity//ATP binding	--	--	--	--	UP	7.4263	2.2383e-16	estscan,start:1429 end:200; minus strand	Category 1
Cluster-1496.0	5	15	11	48	44	42	0.12	0.32	0.22	0.76	0.66	0.72	2902	7876400	ONI26984.1	4120	0	hypothetical protein PRUPE_1G060700 [Prunus persica]	XM_007225244.1	XM_007225244	2520	0	Prunus persica hypothetical protein (PRUPE_ppa001210mg) mRNA, complete cds	--	--	--	--	Q9LHP4	3118	0	Receptor-like protein kinase 2 OS=Arabidopsis thaliana OX=3702 GN=RCH2 PE=1 SV=1	PF13855//PF00069//PF00560//PF07714	Leucine rich repeat//Protein kinase domain//Leucine Rich Repeat//Protein tyrosine kinase	GO:0006468	protein phosphorylation	GO:0005515//GO:0005524//GO:0004672	protein binding//ATP binding//protein kinase activity	--	--	--	--	DOWN	-1.7568	0.00097189	blast,frame:1 start:1 end:2781	Category 1
Cluster-1521.0	36	31	32	13	12	1	1.22	0.96	0.92	0.29	0.26	0.02	2113	10085110	PLY87587.1	341	3.6e-29	hypothetical protein LSAT_8X78121 [Lactuca sativa]	FR714868.1	FR714868	1540	0	Malus x domestica mitchondrial complete genome, cultivar Golden delicious	--	--	--	--	P93312	244	2.9e-19	Uncharacterized tatC-like protein ymf16 OS=Arabidopsis thaliana OX=3702 GN=YMF16 PE=2 SV=2	PF15220//PF02870	Hypoxia-inducible lipid droplet-associated//6-O-methylguanine DNA methyltransferase, ribonuclease-like domain	GO:0006281//GO:0008284//GO:0010884//GO:0001819	DNA repair//positive regulation of cell proliferation//positive regulation of lipid storage//positive regulation of cytokine production	GO:0003908	methylated-DNA-[protein]-cysteine S-methyltransferase activity	--	--	--	--	UP	2.3239	0.0001447	estscan,start:560 end:1; minus strand	Category 1
Cluster-1702.0	58	60	55	16	33	15	1.47	1.39	1.19	0.27	0.53	0.28	2721	6534205	XP_016648544.1	2905	0	PREDICTED: G-type lectin S-receptor-like serine..threonine-protein kinase At1g67520 isoform X1 [Prunus mume]	XM_016793060.1	XM_016793060	1678	0	PREDICTED: Prunus mume G-type lectin S-receptor-like serine/threonine-protein kinase At1g67520 (LOC103325720), transcript variant X4, mRNA	--	--	--	--	Q9LW83	665	5.7e-68	G-type lectin S-receptor-like serine/threonine-protein kinase CES101 OS=Arabidopsis thaliana OX=3702 GN=CES101 PE=2 SV=2	PF00954//PF11883//PF00069//PF07714	S-locus glycoprotein domain//Domain of unknown function (DUF3403)//Protein kinase domain//Protein tyrosine kinase	GO:0016310//GO:0006468//GO:0048544//GO:0009069	phosphorylation//protein phosphorylation//recognition of pollen//serine family amino acid metabolic process	GO:0004672//GO:0005524//GO:0004674	protein kinase activity//ATP binding//protein serine/threonine kinase activity	--	--	--	--	UP	1.8229	5.432e-06	blast,frame:-1 start:2703 end:907|blast,frame:-3 start:964 end:461|blast,frame:-2 start:431 end:102	Category 1
Cluster-2078.0	20	20	25	13	2	2	4.69	4.05	4.78	1.89	0.27	0.32	551	3489032	XP_008232192.1	508	4.1e-49	PREDICTED: uncharacterized protein LOC103331352 [Prunus mume]	XM_008233970.2	XM_008233970	486	0	PREDICTED: Prunus mume uncharacterized LOC103331352 (LOC103331352), mRNA	--	--	--	--	--	--	--	--	PF15761//PF01080	Immortalisation up-regulated protein//Presenilin	--	--	GO:0004190	aspartic-type endopeptidase activity	GO:0005634//GO:0016021	nucleus//integral component of membrane	--	--	UP	2.2915	0.003462	blast,frame:1 start:1 end:378	Category 1
Cluster-217.0	112	134	146	0	0	0	3.63	3.95	4	0	0	0	2200	7868913	ONI19497.1	2802	0	hypothetical protein PRUPE_3G281400 [Prunus persica]	XM_007216726.1	XM_007216726	1779	0	Prunus persica hypothetical protein (PRUPE_ppa023793mg) mRNA, complete cds	--	--	--	--	O48788	787	3.3e-82	Probable inactive receptor kinase At2g26730 OS=Arabidopsis thaliana OX=3702 GN=At2g26730 PE=1 SV=1	PF00069//PF07714//PF00560//PF13855	Protein kinase domain//Protein tyrosine kinase//Leucine Rich Repeat//Leucine rich repeat	GO:0006468	protein phosphorylation	GO:0004672//GO:0005524//GO:0005515	protein kinase activity//ATP binding//protein binding	--	--	--	--	UP	9.8339	5.3945e-15	blast,frame:3 start:105 end:2024	Category 1
Cluster-2263.0	12	18	21	8	7	2	1.88	2.48	2.72	0.8	0.66	0.22	685	7851054	ONI01638.1	223	5.6e-16	hypothetical protein PRUPE_6G150300 [Prunus persica]	XM_008223547.2	XM_008223547	86	6.10005e-35	PREDICTED: Prunus mume WAT1-related protein At4g15540-like (LOC103321721), mRNA	--	--	--	--	--	--	--	--	PF05365	Ubiquinol-cytochrome C reductase, UQCRX/QCR9 like	GO:0006122	mitochondrial electron transport, ubiquinol to cytochrome c	--	--	GO:0005750//GO:0005743	mitochondrial respiratory chain complex III//mitochondrial inner membrane	--	--	UP	1.9522	0.014594	blast,frame:1 start:247 end:432	Category 1
Cluster-2269.0	0	0	0	20	12	9	0	0	0	0.81	0.46	0.4	1297	--	--	--	--	--	XM_001804515.1	XM_001804515	592	0	Phaeosphaeria nodorum SN15 hypothetical protein partial mRNA	K01915	glnA, GLUL	glutamine synthetase	http://www.genome.jp/dbget-bin/www_bget?ko:K01915	Q96V52	1339	1.9e-146	Glutamine synthetase OS=Emericella nidulans (strain FGSC A4 / ATCC 38163 / CBS 112.46 / NRRL 194 / M139) OX=227321 GN=glnA PE=3 SV=3	PF02017//PF00120//PF03951	CIDE-N domain//Glutamine synthetase, catalytic domain//Glutamine synthetase, beta-Grasp domain	GO:0009252//GO:0006542//GO:0006807//GO:0006915	peptidoglycan biosynthetic process//glutamine biosynthetic process//nitrogen compound metabolic process//apoptotic process	GO:0004356	glutamate-ammonia ligase activity	GO:0005622	intracellular	KOG0683	Glutamine synthetase	DOWN	-5.8459	0.00027353	estscan,start:1297 end:8; minus strand	Category 1
Cluster-227.0	9	5	13	0	0	0	0.76	0.38	0.92	0	0	0	1023	3495767	XP_008225752.1	1586	7.5e-174	PREDICTED: putative wall-associated receptor kinase-like 16 [Prunus mume]	XM_008227530.1	XM_008227530	1002	0	PREDICTED: Prunus mume putative wall-associated receptor kinase-like 16 (LOC103325365), mRNA	--	--	--	--	Q7X8C5	436	7.7e-42	Wall-associated receptor kinase-like 2 OS=Arabidopsis thaliana OX=3702 GN=WAKL2 PE=2 SV=1	PF00069//PF00008//PF07714//PF07645	Protein kinase domain//EGF-like domain//Protein tyrosine kinase//Calcium-binding EGF domain	GO:0006468	protein phosphorylation	GO:0005524//GO:0005509//GO:0004672//GO:0005515	ATP binding//calcium ion binding//protein kinase activity//protein binding	--	--	--	--	UP	5.9698	0.00033652	estscan,start:1023 end:1; minus strand	Category 1
Cluster-230.0	4	7	9	0	0	0	0.46	0.72	0.86	0	0	0	830	7860631	ONI11215.1	1160	1.5e-124	hypothetical protein PRUPE_4G092700 [Prunus persica]	XM_007212462.1	XM_007212462	648	0	Prunus persica hypothetical protein (PRUPE_ppa019278mg) mRNA, partial cds	--	--	--	--	Q9LMN6	467	1.6e-45	Wall-associated receptor kinase 4 OS=Arabidopsis thaliana OX=3702 GN=WAK4 PE=2 SV=1	PF00069//PF07714	Protein kinase domain//Protein tyrosine kinase	GO:0006468	protein phosphorylation	GO:0004672//GO:0005524	protein kinase activity//ATP binding	--	--	--	--	UP	5.5253	0.0021288	blast,frame:2 start:2 end:829	Category 1
Cluster-2535.0	0	1	4	16	18	13	0	0.06	0.23	0.73	0.78	0.65	1180	10940030	XP_024186984.1	1179	1.4e-126	wall-associated receptor kinase 3-like [Rosa chinensis]	XM_016791919.1	XM_016791919	1064	0	PREDICTED: Prunus mume putative wall-associated receptor kinase-like 16 (LOC103322715), mRNA	--	--	--	--	Q9LMN8	839	1.7e-88	Wall-associated receptor kinase 3 OS=Arabidopsis thaliana OX=3702 GN=WAK3 PE=2 SV=2	PF00069//PF07714	Protein kinase domain//Protein tyrosine kinase	GO:0006468	protein phosphorylation	GO:0005524//GO:0004672	ATP binding//protein kinase activity	--	--	--	--	DOWN	-2.8905	0.010907	estscan,start:1180 end:33; minus strand	Category 1
Cluster-257.0	17	38	27	0	0	0	0.8	1.62	1.07	0	0	0	1608	7877829	ONI28413.1	749	1.3e-76	hypothetical protein PRUPE_1G141200 [Prunus persica]	XM_008224934.1	XM_008224934	447	0	PREDICTED: Prunus mume aspartic proteinase nepenthesin-2-like (LOC103322977), mRNA	--	--	--	--	Q3EBM5	252	2.6e-20	Probable aspartic protease At2g35615 OS=Arabidopsis thaliana OX=3702 GN=At2g35615 PE=3 SV=1	PF00026	Eukaryotic aspartyl protease	GO:0006508	proteolysis	GO:0004190	aspartic-type endopeptidase activity	--	--	--	--	UP	7.5719	4.844e-08	estscan,start:1608 end:123; minus strand	Category 1
Cluster-2778.0	2	2	6	24	32	12	0.25	0.22	0.63	1.94	2.45	1.06	782	3496910	XP_008227433.1	734	3.6e-75	PREDICTED: uncharacterized protein LOC103326951 [Prunus mume]	XM_008229211.2	XM_008229211	660	0	PREDICTED: Prunus mume uncharacterized LOC103326951 (LOC103326951), mRNA	--	--	--	--	--	--	--	--	PF08515	Transforming growth factor beta type I GS-motif	GO:0016310//GO:0006468//GO:0009069//GO:0007178	phosphorylation//protein phosphorylation//serine family amino acid metabolic process//transmembrane receptor protein serine/threonine kinase signaling pathway	GO:0005524//GO:0004675	ATP binding//transmembrane receptor protein serine/threonine kinase activity	GO:0016020	membrane	--	--	DOWN	-2.3947	0.006043	blast,frame:-3 start:768 end:223	Category 1
Cluster-2828.0	2	3	7	33	51	56	0.06	0.08	0.18	0.67	0.99	1.24	2312	3498452	XP_008229613.1	1923	1.4e-212	PREDICTED: wall-associated receptor kinase-like 1 isoform X1 [Prunus mume]	XM_008231391.2	XM_008231391	2232	0	PREDICTED: Prunus mume wall-associated receptor kinase-like 9 (LOC103328964), transcript variant X1, mRNA	--	--	--	--	Q7X8C5	1051	8.5e-113	Wall-associated receptor kinase-like 2 OS=Arabidopsis thaliana OX=3702 GN=WAKL2 PE=2 SV=1	PF13947//PF07645//PF00069//PF00008//PF08488//PF07714	Wall-associated receptor kinase galacturonan-binding//Calcium-binding EGF domain//Protein kinase domain//EGF-like domain//Wall-associated kinase//Protein tyrosine kinase	GO:0009069//GO:0006468//GO:0016310	serine family amino acid metabolic process//protein phosphorylation//phosphorylation	GO:0005509//GO:0004672//GO:0005515//GO:0004674//GO:0030247//GO:0005524	calcium ion binding//protein kinase activity//protein binding//protein serine/threonine kinase activity//polysaccharide binding//ATP binding	GO:0016021	integral component of membrane	--	--	DOWN	-3.1957	7.6073e-07	blast,frame:3 start:3 end:2312	Category 1
Cluster-2957.0	42	51	47	21	25	21	1.03	1.14	0.98	0.34	0.39	0.38	2807	7867127	ONI17711.1	3207	0	hypothetical protein PRUPE_3G175800 [Prunus persica]	XM_007217232.1	XM_007217232	670	0	Prunus persica hypothetical protein (PRUPE_ppa018295mg) mRNA, complete cds	--	--	--	--	Q9C5E5	370	9.6e-34	Diacylglycerol kinase 5 OS=Arabidopsis thaliana OX=3702 GN=DGK5 PE=2 SV=1	PF02367//PF00781//PF00609//PF00931//PF00005	Threonylcarbamoyl adenosine biosynthesis protein TsaE//Diacylglycerol kinase catalytic domain//Diacylglycerol kinase accessory domain//NB-ARC domain//ABC transporter	GO:0046486//GO:0009395//GO:0007205//GO:0002949	glycerolipid metabolic process//phospholipid catabolic process//protein kinase C-activating G-protein coupled receptor signaling pathway//tRNA threonylcarbamoyladenosine modification	GO:0005524//GO:0016301//GO:0043531//GO:0016887//GO:0004143	ATP binding//kinase activity//ADP binding//ATPase activity//diacylglycerol kinase activity	--	--	--	--	UP	1.4325	0.00043079	blast,frame:3 start:126 end:2729	Category 1
Cluster-3056.0	0	0	0	9	5	12	0	0	0	1.59	0.83	2.33	499	10866276	PRQ29941.1	346	2.2e-30	putative EF-hand domain pair protein [Rosa chinensis]	XM_007212669.1	XM_007212669	243	2.3088e-122	Prunus persica hypothetical protein (PRUPE_ppa019115mg) mRNA, complete cds	K13448	CML	calcium-binding protein CML	http://www.genome.jp/dbget-bin/www_bget?ko:K13448	Q84V36	235	7.6e-19	Polcalcin Che a 3 OS=Chenopodium album OX=3559 PE=1 SV=1	PF00404//PF13833//PF13202//PF13405//PF10591//PF00036//PF13499	Dockerin type I repeat//EF-hand domain pair//EF hand//EF-hand domain//Secreted protein acidic and rich in cysteine Ca binding region//EF hand//EF-hand domain pair	GO:0005975//GO:0007165	carbohydrate metabolic process//signal transduction	GO:0004553//GO:0005509	hydrolase activity, hydrolyzing O-glycosyl compounds//calcium ion binding	GO:0005578	proteinaceous extracellular matrix	--	--	DOWN	-5.2153	0.0037604	blast,frame:-2 start:483 end:205	Category 1
Cluster-3066.1	0	0	0	12	3	11	0	0	0	0.74	0.18	0.74	942	10676567	XP_023898236.1	926	2.4e-97	probable aspartic-type endopeptidase opsB [Quercus suber]	--	--	--	--	--	--	--	--	--	Q8NKB6	873	1.5e-92	Probable aspartic-type endopeptidase opsB OS=Aspergillus oryzae (strain ATCC 42149 / RIB 40) OX=510516 GN=opsB PE=2 SV=1	PF00026	Eukaryotic aspartyl protease	GO:0006508	proteolysis	GO:0004190	aspartic-type endopeptidase activity	--	--	KOG1339	Aspartyl protease	DOWN	-5.2211	0.0043769	blast,frame:1 start:1 end:942	Category 1
Cluster-3125.0	1	2	3	24	39	25	0.07	0.13	0.18	1.14	1.76	1.3	1143	--	--	--	--	--	XM_016793485.1	XM_016793485	198	5.69773e-97	PREDICTED: Prunus mume wall-associated receptor kinase-like 10 (LOC107880924), mRNA	--	--	--	--	Q9LMN6	255	8.4e-21	Wall-associated receptor kinase 4 OS=Arabidopsis thaliana OX=3702 GN=WAK4 PE=2 SV=1	PF07645//PF13947	Calcium-binding EGF domain//Wall-associated receptor kinase galacturonan-binding	--	--	GO:0030247//GO:0005509	polysaccharide binding//calcium ion binding	--	--	--	--	DOWN	-3.5051	5.2136e-05	estscan,start:1143 end:150; minus strand	Category 1
Cluster-320.0	29	32	28	0	0	2	6.27	6	4.95	0	0	0.3	574	--	--	--	--	--	XM_008227591.2	XM_008227591	470	0	PREDICTED: Prunus mume cysteine-rich and transmembrane domain-containing protein B-like (LOC103325433), mRNA	--	--	--	--	--	--	--	--	PF06682	SOCE-associated regulatory factor of calcium homoeostasis	GO:2001256	regulation of store-operated calcium entry	--	--	GO:0030176	integral component of endoplasmic reticulum membrane	--	--	UP	5.8401	1.7761e-06	estscan,start:574 end:64; minus strand	Category 1
Cluster-3251.1	10	16	23	50	63.12	49	0.29	0.42	0.56	0.96	1.16	1.03	2424	6535164	XP_016649452.1	3878	0	PREDICTED: G-type lectin S-receptor-like serine..threonine-protein kinase At4g03230 isoform X1 [Prunus mume]	XM_016793966.1	XM_016793966	2363	0	PREDICTED: Prunus mume G-type lectin S-receptor-like serine/threonine-protein kinase At4g03230 (LOC103329377), transcript variant X1, mRNA	--	--	--	--	Q9ZR08	1503	3.4e-165	G-type lectin S-receptor-like serine/threonine-protein kinase At4g03230 OS=Arabidopsis thaliana OX=3702 GN=At4g03230 PE=3 SV=3	PF13947//PF00954//PF11883//PF00069//PF07714//PF01221//PF06305	Wall-associated receptor kinase galacturonan-binding//S-locus glycoprotein domain//Domain of unknown function (DUF3403)//Protein kinase domain//Protein tyrosine kinase//Dynein light chain type 1//Protein of unknown function (DUF1049)	GO:0009069//GO:0007017//GO:0016310//GO:0048544//GO:0006468	serine family amino acid metabolic process//microtubule-based process//phosphorylation//recognition of pollen//protein phosphorylation	GO:0004672//GO:0005524//GO:0030247//GO:0004674	protein kinase activity//ATP binding//polysaccharide binding//protein serine/threonine kinase activity	GO:0005887//GO:0005875	integral component of plasma membrane//microtubule associated complex	--	--	DOWN	-1.3679	0.0029166	blast,frame:1 start:1 end:2250	Category 1
Cluster-3361.2	1	9	6	37	21	19	0.06	0.49	0.31	1.47	0.79	0.83	1312	7742585	GAV72851.1	1364	5.3e-148	PB1 domain-containing protein..Pkinase_Tyr domain-containing protein, partial [Cephalotus follicularis]	XM_007203930.1	XM_007203930	1208	0	Prunus persica hypothetical protein (PRUPE_ppa000872mg) mRNA, complete cds	--	--	--	--	Q05609	475	3e-46	Serine/threonine-protein kinase CTR1 OS=Arabidopsis thaliana OX=3702 GN=CTR1 PE=1 SV=1	PF06293//PF00069//PF07714	Lipopolysaccharide kinase (Kdo/WaaP) family//Protein kinase domain//Protein tyrosine kinase	GO:0006468	protein phosphorylation	GO:0004672//GO:0016773//GO:0005524	protein kinase activity//phosphotransferase activity, alcohol group as acceptor//ATP binding	GO:0016020	membrane	--	--	DOWN	-1.9212	0.016011	blast,frame:2 start:2 end:847	Category 1
Cluster-3495.0	92	124	163	73	70	50	5.59	6.8	8.33	2.92	2.65	2.18	1310	--	--	--	--	--	XM_008237961.2	XM_008237961	1032	0	PREDICTED: Prunus mume aquaporin-like (LOC103334976), mRNA	--	--	--	--	Q651D5	278	2.1e-23	Probable aquaporin PIP2-7 OS=Oryza sativa subsp. japonica OX=39947 GN=PIP2-7 PE=2 SV=2	PF03419//PF00230	Sporulation factor SpoIIGA//Major intrinsic protein	GO:0006810//GO:0006508//GO:0030436	transport//proteolysis//asexual sporulation	GO:0004190//GO:0005215	aspartic-type endopeptidase activity//transporter activity	GO:0016020	membrane	KOG0223	Aquaporin (major intrinsic protein family)	UP	1.3314	3.9687e-07	blast,frame:3 start:204 end:1094	Category 1
Cluster-3501.0	0	0	0	22	26	21	0	0	0	0.95	1.07	0.99	1228	3504654	XP_008238313.1	1654	1.2e-181	PREDICTED: mitogen-activated protein kinase kinase 10 [Prunus mume]	XM_008240091.2	XM_008240091	1116	0	PREDICTED: Prunus mume mitogen-activated protein kinase kinase 10 (LOC103336958), mRNA	--	--	--	--	Q9LQM8	767	3.9e-80	Mitogen-activated protein kinase kinase 10 OS=Arabidopsis thaliana OX=3702 GN=MKK10 PE=1 SV=1	PF06293//PF00069//PF07714	Lipopolysaccharide kinase (Kdo/WaaP) family//Protein kinase domain//Protein tyrosine kinase	GO:0006468	protein phosphorylation	GO:0004672//GO:0005524//GO:0016773	protein kinase activity//ATP binding//phosphotransferase activity, alcohol group as acceptor	GO:0016020	membrane	--	--	DOWN	-6.5936	5.3526e-06	estscan,start:1228 end:116; minus strand	Category 1
Cluster-3561.0	1	4	4	23	17	15	0.08	0.28	0.26	1.17	0.82	0.84	1085	8263870	XP_020414866.1	1103	8.1e-118	probable LRR receptor-like serine..threonine-protein kinase At1g51880 [Prunus persica]	XM_016793911.1	XM_016793911	897	0	PREDICTED: Prunus mume probable LRR receptor-like serine/threonine-protein kinase At1g05700 (LOC103329083), mRNA	--	--	--	--	Q9C8I6	888	3.2e-94	LRR receptor-like serine/threonine-protein kinase IOS1 OS=Arabidopsis thaliana OX=3702 GN=IOS1 PE=1 SV=1	PF00069//PF07714	Protein kinase domain//Protein tyrosine kinase	GO:0006468	protein phosphorylation	GO:0004672//GO:0005524	protein kinase activity//ATP binding	--	--	--	--	DOWN	-2.2608	0.015039	estscan,start:1085 end:239; minus strand	Category 1
Cluster-3711.0	17	19	16	9	8	5	4.74	4.53	3.61	1.53	1.29	0.94	508	--	--	--	--	--	--	--	--	--	--	--	--	--	--	--	--	--	--	PF05023	Phytochelatin synthase	GO:0046938//GO:0010038	phytochelatin biosynthetic process//response to metal ion	GO:0046872//GO:0016756	metal ion binding//glutathione gamma-glutamylcysteinyltransferase activity	--	--	--	--	UP	1.618	0.028631	estscan,start:465 end:311; minus strand	Category 1
Cluster-3777.0	38	31	52	10	11	10	0.93	0.69	1.08	0.16	0.17	0.18	2804	9079979	XP_021813532.1	1974	2.1e-218	TMV resistance protein N-like [Prunus avium]	DQ867230.1	DQ867230	425	0	Prunus avium clone pavF14.10 NBS-containing resistance-like protein gene, partial cds	--	--	--	--	Q40392	517	8.6e-51	TMV resistance protein N OS=Nicotiana glutinosa OX=35889 GN=N PE=1 SV=1	PF02921//PF00560//PF13855	Ubiquinol cytochrome reductase transmembrane region//Leucine Rich Repeat//Leucine rich repeat	GO:0006119//GO:0006118//GO:0055114//GO:0015992	oxidative phosphorylation//obsolete electron transport//oxidation-reduction process//proton transport	GO:0008121//GO:0005515	ubiquinol-cytochrome-c reductase activity//protein binding	--	--	--	--	UP	2.3263	2.4376e-06	blast,frame:3 start:2235 end:2588|blast,frame:1 start:1 end:270	Category 1
Cluster-3978.0	0	0	0	11	5	2	0	0	0	1.23	0.53	0.24	639	--	--	--	--	--	--	--	--	--	--	--	--	--	--	--	--	--	--	PF15686//PF00974	Lysine-rich CEACAM1 co-isolated protein family//Rhabdovirus spike glycoprotein	GO:0043066//GO:0045766//GO:0043123	negative regulation of apoptotic process//positive regulation of angiogenesis//positive regulation of I-kappaB kinase/NF-kappaB signaling	--	--	GO:0019031	viral envelope	--	--	DOWN	-4.6525	0.026668	estscan,start:639 end:1; minus strand	Category 1
Cluster-3997.0	14	13	21	1	0	0	0.97	0.81	1.22	0.05	0	0	1183	7881549	ONI32133.1	1345	7.7e-146	hypothetical protein PRUPE_1G350400 [Prunus persica]	XM_007227564.1	XM_007227564	768	0	Prunus persica hypothetical protein (PRUPE_ppa024919mg) mRNA, complete cds	K08597	SENP8, NEDP1, DEN1	sentrin-specific protease 8	http://www.genome.jp/dbget-bin/www_bget?ko:K08597	Q9LSS7	325	6.6e-29	NEDD8-specific protease 1 OS=Arabidopsis thaliana OX=3702 GN=NEDP1 PE=2 SV=1	PF02902	Ulp1 protease family, C-terminal catalytic domain	GO:0006508	proteolysis	GO:0008234	cysteine-type peptidase activity	--	--	KOG3246	Sentrin-specific cysteine protease (Ulp1 family)	UP	5.8375	9.521e-05	blast,frame:-1 start:1003 end:2	Category 1
Cluster-4376.0	8	9	3	34	37	31	0.5	0.51	0.16	1.4	1.44	1.39	1281	7854254	ONI04838.1	230	1.6e-16	hypothetical protein PRUPE_6G342600 [Prunus persica]	XM_008220036.1	XM_008220036	138	1.44709e-63	PREDICTED: Prunus mume calmodulin-like (LOC103318632), mRNA	K13448	CML	calcium-binding protein CML	http://www.genome.jp/dbget-bin/www_bget?ko:K13448	Q948R0	201	1.7e-14	Calmodulin-like protein 5 OS=Oryza sativa subsp. japonica OX=39947 GN=CML5 PE=2 SV=1	PF00036//PF13202//PF12763//PF13405//PF13833//PF13499	EF hand//EF hand//Cytoskeletal-regulatory complex EF hand//EF-hand domain//EF-hand domain pair//EF-hand domain pair	--	--	GO:0005509//GO:0005515	calcium ion binding//protein binding	--	--	KOG0027	Calmodulin and related proteins (EF-Hand superfamily)	DOWN	-1.9666	0.0019308	blast,frame:-1 start:1107 end:832	Category 1
Cluster-46.0	14	25	12	0	0	0	14.21	19.17	8.99	0	0	0	335	7883049	ONI33633.1	245	7.7e-19	hypothetical protein PRUPE_1G437200 [Prunus persica]	XM_007223710.1	XM_007223710	142	2.09732e-66	Prunus persica hypothetical protein (PRUPE_ppa013918mg) mRNA, complete cds	--	--	--	--	--	--	--	--	PF13833//PF13499//PF13405//PF00036//PF13202//PF00113	EF-hand domain pair//EF-hand domain pair//EF-hand domain//EF hand//EF hand//Enolase, C-terminal TIM barrel domain	GO:0006094//GO:0000162//GO:0006571//GO:0009094//GO:0006096	gluconeogenesis//tryptophan biosynthetic process//tyrosine biosynthetic process//L-phenylalanine biosynthetic process//glycolytic process	GO:0000287//GO:0005509//GO:0004634	magnesium ion binding//calcium ion binding//phosphopyruvate hydratase activity	GO:0000015	phosphopyruvate hydratase complex	--	--	UP	6.9021	2.7267e-06	blast,frame:-3 start:303 end:37	Category 1
Cluster-4783.0	269.32	285.98	275.52	8.76	13.98	11.66	5.67	5.5	4.93	0.12	0.19	0.18	3222	6534198	XP_016648537.1	1460	9.7e-159	PREDICTED: cysteine-rich receptor-like protein kinase 10 [Prunus mume]	XM_016793051.1	XM_016793051	1113	0	PREDICTED: Prunus mume cysteine-rich receptor-like protein kinase 10 (LOC107880086), mRNA	K04733	IRAK4	interleukin-1 receptor-associated kinase 4	http://www.genome.jp/dbget-bin/www_bget?ko:K04733	Q8GYA4	917	4.1e-97	Cysteine-rich receptor-like protein kinase 10 OS=Arabidopsis thaliana OX=3702 GN=CRK10 PE=1 SV=3	PF00069//PF05454//PF07714//PF11883	Protein kinase domain//Dystroglycan (Dystrophin-associated glycoprotein 1)//Protein tyrosine kinase//Domain of unknown function (DUF3403)	GO:0016310//GO:0006468//GO:0009069//GO:0007016	phosphorylation//protein phosphorylation//serine family amino acid metabolic process//cytoskeletal anchoring at plasma membrane	GO:0005524//GO:0004674//GO:0004672	ATP binding//protein serine/threonine kinase activity//protein kinase activity	GO:0016010	dystrophin-associated glycoprotein complex	--	--	UP	4.9413	1.1398e-61	blast,frame:3 start:2538 end:2669|blast,frame:2 start:1160 end:2224	Category 1
Cluster-4862.0	38	42	54	23	21	22	2.12	2.12	2.54	0.85	0.73	0.88	1399	--	--	--	--	--	XM_008239161.2	XM_008239161	1289	0	PREDICTED: Prunus mume metacaspase-1-like (LOC103336125), mRNA	--	--	--	--	Q7XJE6	961	1.4e-102	Metacaspase-1 OS=Arabidopsis thaliana OX=3702 GN=AMC1 PE=1 SV=1	PF00656	Caspase domain	GO:0006508	proteolysis	GO:0004197	cysteine-type endopeptidase activity	--	--	KOG1546	Metacaspase involved in regulation of apoptosis	UP	1.3794	0.0010302	blast,frame:1 start:46 end:1275	Category 1
Cluster-5162.0	27	35	44	15	20	6	1.11	1.31	1.53	0.41	0.52	0.18	1793	6531368	XP_016652625.1	970	3.5e-102	PREDICTED: uncharacterized protein LOC103343679 [Prunus mume]	XM_016797139.1	XM_016797139	601	0	PREDICTED: Prunus mume uncharacterized LOC103343679 (LOC103343679), mRNA	--	--	--	--	--	--	--	--	PF02902//PF05715	Ulp1 protease family, C-terminal catalytic domain//Piccolo Zn-finger	GO:0006508	proteolysis	GO:0008234//GO:0046872	cysteine-type peptidase activity//metal ion binding	GO:0045202	synapse	--	--	UP	1.7446	0.00097745	blast,frame:-3 start:777 end:208	Category 1
Cluster-5185.0	0	0	0	6	5	8	0	0	0	0.6	0.47	0.88	682	--	--	--	--	--	XM_018525267.1	XM_018525267	179	1.21594e-86	Alternaria alternata hypothetical protein mRNA	--	--	--	--	--	--	--	--	PF07289//PF07267//PF01080	Protein of unknown function (DUF1448)//Nucleopolyhedrovirus capsid protein P87//Presenilin	--	--	GO:0004190	aspartic-type endopeptidase activity	GO:0019028//GO:0016021//GO:0034464	viral capsid//integral component of membrane//BBSome	--	--	DOWN	-4.7526	0.016382	estscan,start:682 end:1; minus strand	Category 1
Cluster-5548.1	172	197	218	39	40	37	3.3	3.45	3.55	0.5	0.49	0.52	3508	9099757	XP_021800497.1	3586	0	putative receptor-like protein kinase At3g47110 [Prunus avium]	XM_008225685.2	XM_008225685	2626	0	PREDICTED: Prunus mume probable LRR receptor-like serine/threonine-protein kinase At3g47570 (LOC103323673), mRNA	--	--	--	--	Q9SD62	1942	6.2e-216	Putative receptor-like protein kinase At3g47110 OS=Arabidopsis thaliana OX=3702 GN=At3g47110 PE=3 SV=1	PF00560//PF13855//PF00069//PF03623//PF07714	Leucine Rich Repeat//Leucine rich repeat//Protein kinase domain//Focal adhesion targeting region//Protein tyrosine kinase	GO:0006468//GO:0007172//GO:0007165	protein phosphorylation//signal complex assembly//signal transduction	GO:0005524//GO:0005515//GO:0004871//GO:0004672//GO:0004713	ATP binding//protein binding//signal transducer activity//protein kinase activity//protein tyrosine kinase activity	GO:0005925	focal adhesion	--	--	UP	2.7031	3.6244e-33	blast,frame:3 start:162 end:2912|blast,frame:2 start:2870 end:3337	Category 1
Cluster-5592.0	50	50	65	6	5	2	3.4	3.06	3.71	0.27	0.21	0.1	1202	7839811	ONH90394.1	1901	2.6e-210	hypothetical protein PRUPE_8G051600 [Prunus persica]	XM_007200084.1	XM_007200084	1017	0	Prunus persica hypothetical protein (PRUPE_ppa016981mg) mRNA, complete cds	--	--	--	--	Q940R4	483	3.2e-47	Probable aspartyl protease At4g16563 OS=Arabidopsis thaliana OX=3702 GN=At4g16563 PE=2 SV=1	PF00026	Eukaryotic aspartyl protease	GO:0006508	proteolysis	GO:0004190	aspartic-type endopeptidase activity	--	--	--	--	UP	4.0335	3.1115e-13	estscan,start:1202 end:105; minus strand	Category 1
Cluster-5636.0	28	26	35	23	16	7	0.9	0.76	0.95	0.49	0.32	0.16	2220	3495102	XP_008224859.1	2742	1.5e-307	PREDICTED: cysteine-rich receptor-like protein kinase 25 [Prunus mume]	XM_008226637.2	XM_008226637	1921	0	PREDICTED: Prunus mume cysteine-rich receptor-like protein kinase 25 (LOC103324565), mRNA	--	--	--	--	Q9M0X5	1519	4.4e-167	Cysteine-rich receptor-like protein kinase 25 OS=Arabidopsis thaliana OX=3702 GN=CRK25 PE=3 SV=1	PF07714//PF07649//PF14991//PF00069	Protein tyrosine kinase//C1-like domain//Protein melan-A//Protein kinase domain	GO:0055114//GO:0006468	oxidation-reduction process//protein phosphorylation	GO:0047134//GO:0005524//GO:0004672	protein-disulfide reductase activity//ATP binding//protein kinase activity	GO:0042470	melanosome	--	--	UP	1.3244	0.022154	blast,frame:2 start:2 end:2041	Category 1
Cluster-5882.0	165	205	194	130	108	100	4.43	5.02	4.42	2.33	1.84	1.95	2591	7872442	ONI23026.1	2264	4.6e-252	hypothetical protein PRUPE_2G165100 [Prunus persica]	XM_008246695.1	XM_008246695	1374	0	PREDICTED: Prunus mume O-glucosyltransferase rumi homolog (LOC103343024), mRNA	--	--	--	--	Q16QY8	261	3.8e-21	O-glucosyltransferase rumi homolog OS=Aedes aegypti OX=7159 GN=AAEL011121 PE=3 SV=1	PF02285	Cytochrome oxidase c subunit VIII	GO:0006123//GO:0015992	mitochondrial electron transport, cytochrome c to oxygen//proton transport	GO:0004129	cytochrome-c oxidase activity	GO:0045277	respiratory chain complex IV	--	--	UP	1.1032	3.8381e-08	blast,frame:3 start:1038 end:2426	Category 1
Cluster-5933.0	0	0	0	10	4	6	0	0	0	1.2	0.45	0.79	613	--	--	--	--	--	--	--	--	--	--	--	--	--	--	--	--	--	--	PF04086//PF16588//PF01080//PF00098	Signal recognition particle, alpha subunit, N-terminal//C2H2 zinc-finger//Presenilin//Zinc knuckle	GO:0006886	intracellular protein transport	GO:0003924//GO:0004190//GO:0005047//GO:0003676//GO:0008270//GO:0005525	GTPase activity//aspartic-type endopeptidase activity//signal recognition particle binding//nucleic acid binding//zinc ion binding//GTP binding	GO:0016021//GO:0005786//GO:0005785	integral component of membrane//signal recognition particle, endoplasmic reticulum targeting//signal recognition particle receptor complex	--	--	DOWN	-4.8253	0.01399	blast,frame:2 start:2 end:178	Category 1
Cluster-5951.0	19	20	29	1	3	2	1.02	0.97	1.31	0.04	0.1	0.08	1444	3557064	XP_008391082.1	1849	3.4e-204	PREDICTED: aspartic proteinase CDR1-like [Malus domestica]	XM_008225680.1	XM_008225680	1330	0	PREDICTED: Prunus mume aspartic proteinase nepenthesin-1-like (LOC103323670), mRNA	--	--	--	--	Q3EBM5	564	1.6e-56	Probable aspartic protease At2g35615 OS=Arabidopsis thaliana OX=3702 GN=At2g35615 PE=3 SV=1	PF00026	Eukaryotic aspartyl protease	GO:0006508	proteolysis	GO:0004190	aspartic-type endopeptidase activity	--	--	--	--	UP	3.8655	7.32e-06	blast,frame:2 start:65 end:1426	Category 1
Cluster-6071.0	19	18	14	1	0	0	1.74	1.48	1.07	0.06	0	0	966	3499453	XP_008231017.1	1507	1e-164	PREDICTED: receptor-like protein kinase FERONIA [Prunus mume]	XM_008232795.2	XM_008232795	925	0	PREDICTED: Prunus mume receptor-like protein kinase FERONIA (LOC103330253), mRNA	--	--	--	--	Q9SCZ4	871	2.6e-92	Receptor-like protein kinase FERONIA OS=Arabidopsis thaliana OX=3702 GN=FER PE=1 SV=1	PF07714//PF11520//PF01754//PF00069	Protein tyrosine kinase//Chromatin protein Cren7//A20-like zinc finger//Protein kinase domain	GO:0006468	protein phosphorylation	GO:0004672//GO:0005524//GO:0008270//GO:0003677//GO:0003690	protein kinase activity//ATP binding//zinc ion binding//DNA binding//double-stranded DNA binding	GO:0005737	cytoplasm	--	--	UP	5.9471	5.7988e-05	estscan,start:966 end:30; minus strand	Category 1
Cluster-6267.0	0	0	0	13	5	6	0	0	0	1.39	0.51	0.7	656	10669748	XP_023890652.1	728	1.5e-74	serine..threonine-protein kinase srk1-like [Quercus suber]	XM_003834764.1	XM_003834764	284	4.98826e-145	Leptosphaeria maculans JN3 similar to calcium/calmodulin-dependent protein kinase (LEMA_P069550.1) mRNA, complete cds	K12761	SNF1	carbon catabolite-derepressing protein kinase	http://www.genome.jp/dbget-bin/www_bget?ko:K12761	O94547	428	4.2e-41	Serine/threonine-protein kinase srk1 OS=Schizosaccharomyces pombe (strain 972 / ATCC 24843) OX=284812 GN=srk1 PE=1 SV=1	PF07714//PF00069	Protein tyrosine kinase//Protein kinase domain	GO:0006468	protein phosphorylation	GO:0005524//GO:0004672	ATP binding//protein kinase activity	--	--	--	--	DOWN	-5.0842	0.0061846	blast,frame:2 start:2 end:649	Category 1
Cluster-6468.0	47	44	49	7	7	7	2.04	1.73	1.79	0.2	0.19	0.22	1718	7849632	ONI00216.1	1057	2.8e-112	hypothetical protein PRUPE_6G075600, partial [Prunus persica]	XM_008225449.1	XM_008225449	1063	0	PREDICTED: Prunus mume factor of DNA methylation 1-like (LOC103323448), mRNA	--	--	--	--	Q95337	183	2.8e-12	Involucrin OS=Tupaia glis OX=9395 GN=IVL PE=2 SV=1	PF03153//PF09106	Transcription factor IIA, alpha/beta subunit//Elongation factor SelB, winged helix	GO:0006448//GO:0001514//GO:0006367	regulation of translational elongation//selenocysteine incorporation//transcription initiation from RNA polymerase II promoter	GO:0003746//GO:0003723//GO:0005525	translation elongation factor activity//RNA binding//GTP binding	GO:0005840//GO:0005672//GO:0005737	ribosome//transcription factor TFIIA complex//cytoplasm	--	--	UP	3.1061	5.1118e-10	blast,frame:3 start:3 end:1505	Category 1
Cluster-6671.1122	418	450.01	519.01	107	109	115	11.06	10.85	11.64	1.89	1.83	2.21	2626	--	--	--	--	--	XM_008229325.2	XM_008229325	1068	0	PREDICTED: Prunus mume cyclic nucleotide-gated ion channel 1-like (LOC103327048), mRNA	K05391	CNGF	cyclic nucleotide gated channel, other eukaryote	http://www.genome.jp/dbget-bin/www_bget?ko:K05391	O65717	733	7.2e-76	Cyclic nucleotide-gated ion channel 1 OS=Arabidopsis thaliana OX=3702 GN=CNGC1 PE=1 SV=1	PF05392//PF00520//PF01326	Cytochrome C oxidase chain VIIB//Ion transport protein//Pyruvate phosphate dikinase, PEP/pyruvate binding domain	GO:0016310//GO:0006811//GO:0055085//GO:0006123//GO:0015992	phosphorylation//ion transport//transmembrane transport//mitochondrial electron transport, cytochrome c to oxygen//proton transport	GO:0016301//GO:0004129//GO:0005524//GO:0005216	kinase activity//cytochrome-c oxidase activity//ATP binding//ion channel activity	GO:0005746//GO:0016020//GO:0045277	mitochondrial respiratory chain//membrane//respiratory chain complex IV	--	--	UP	2.4291	1.5981e-60	blast,frame:3 start:117 end:1658	Category 1
Cluster-6671.1138	192	249	216	3	1	3	10.61	12.44	10.06	0.11	0.03	0.12	1410	--	--	--	--	--	XM_016792739.1	XM_016792739	332	2.28705e-171	PREDICTED: Prunus mume uncharacterized mitochondrial protein AtMg00810-like (LOC107880674), mRNA	--	--	--	--	Q94HW2	377	7.4e-35	Retrovirus-related Pol polyprotein from transposon RE1 OS=Arabidopsis thaliana OX=3702 GN=RE1 PE=2 SV=1	PF00619	Caspase recruitment domain	GO:0042981	regulation of apoptotic process	--	--	--	--	--	--	UP	6.9188	1.7335e-31	estscan,start:1216 end:193; minus strand	Category 1
Cluster-6671.1197	26	28	31	78	93	58	0.77	0.75	0.77	1.53	1.74	1.24	2386	3491621	XP_008220026.1	2250	1.8e-250	PREDICTED: proline-rich receptor-like protein kinase PERK15 [Prunus mume]	XM_008221804.2	XM_008221804	2218	0	PREDICTED: Prunus mume proline-rich receptor-like protein kinase PERK15 (LOC103320174), mRNA	--	--	--	--	Q9LV48	1169	1.8e-126	Proline-rich receptor-like protein kinase PERK1 OS=Arabidopsis thaliana OX=3702 GN=PERK1 PE=1 SV=1	PF07714//PF00069	Protein tyrosine kinase//Protein kinase domain	GO:0006468	protein phosphorylation	GO:0004672//GO:0005524	protein kinase activity//ATP binding	--	--	--	--	DOWN	-1.0548	0.0042083	blast,frame:-1 start:2386 end:182	Category 1
Cluster-6671.1219	541	526	602	9	9	9	13.03	11.55	12.3	0.14	0.14	0.16	2856	10893486	PRQ57151.1	1269	1.2e-136	putative protein kinase RLK-Pelle-LRR-XII-1 family [Rosa chinensis]	XM_004308889.2	XM_004308889	777	0	PREDICTED: Fragaria vesca subsp. vesca putative receptor-like protein kinase At3g47110 (LOC101299142), mRNA	--	--	--	--	Q2R2D5	716	7.4e-74	Receptor kinase-like protein Xa21 OS=Oryza sativa subsp. japonica OX=39947 GN=XA21 PE=1 SV=1	PF07714//PF13855//PF00069//PF00560	Protein tyrosine kinase//Leucine rich repeat//Protein kinase domain//Leucine Rich Repeat	GO:0006468	protein phosphorylation	GO:0004672//GO:0005524//GO:0005515	protein kinase activity//ATP binding//protein binding	--	--	--	--	UP	6.3185	1.0777e-93	estscan,start:2856 end:59; minus strand	Category 1
Cluster-6671.1240	20	43	22	0	0	0	2.05	3.92	1.88	0	0	0	897	10967249	XP_024172019.1	430	7.3e-40	uncharacterized protein LOC112178032 [Rosa chinensis]	XM_010679724.1	XM_010679724	47	3.86462e-13	PREDICTED: Beta vulgaris subsp. vulgaris uncharacterized LOC104893598 (LOC104893598), mRNA	--	--	--	--	P31843	265	4.6e-22	RNA-directed DNA polymerase homolog OS=Oenothera berteroana OX=3950 PE=4 SV=1	PF01001	Hepatitis C virus non-structural protein NS4b	GO:0006144//GO:0006508	purine nucleobase metabolic process//proteolysis	GO:0003968//GO:0017111//GO:0004197//GO:0004252	RNA-directed RNA polymerase activity//nucleoside-triphosphatase activity//cysteine-type endopeptidase activity//serine-type endopeptidase activity	GO:0031379	RNA-directed RNA polymerase complex	--	--	UP	7.6329	3.739e-08	blast,frame:-2 start:701 end:417	Category 1
Cluster-6671.1246	138	181	139	2	0	4	7.04	8.35	5.98	0.07	0	0.15	1504	6534677	XP_016649004.1	1624	4.3e-178	PREDICTED: LOW QUALITY PROTEIN: uncharacterized protein LOC103329478 [Prunus mume]	XM_016793518.1	XM_016793518	790	0	PREDICTED: Prunus mume uncharacterized LOC103329478 (LOC103329478), mRNA	--	--	--	--	O64477	677	1.3e-69	G-type lectin S-receptor-like serine/threonine-protein kinase At2g19130 OS=Arabidopsis thaliana OX=3702 GN=At2g19130 PE=2 SV=1	PF07714//PF00954//PF00069	Protein tyrosine kinase//S-locus glycoprotein domain//Protein kinase domain	GO:0048544//GO:0006468	recognition of pollen//protein phosphorylation	GO:0005524//GO:0004672	ATP binding//protein kinase activity	--	--	--	--	UP	6.621	3.3596e-24	estscan,start:1 end:1504	Category 1
Cluster-6671.1304	90.6	114	108.01	62.87	28.51	30.85	2.32	2.66	2.35	1.07	0.46	0.58	2702	8266215	XP_020417038.1	2155	2.1e-239	..-..-alpha-pinene synthase-like isoform X1 [Prunus persica]	XM_008228578.2	XM_008228578	1191	0	PREDICTED: Prunus mume (-)-alpha-pinene synthase-like (LOC103326362), mRNA	--	--	--	--	O23945	1509	7.7e-166	(-)-alpha-pinene synthase OS=Fragaria vesca OX=57918 PE=1 SV=2	PF03936//PF02297//PF01397	Terpene synthase family, metal binding domain//Cytochrome oxidase c subunit VIb//Terpene synthase, N-terminal domain	GO:0015992//GO:0006123//GO:0008152	proton transport//mitochondrial electron transport, cytochrome c to oxygen//metabolic process	GO:0016829//GO:0010333//GO:0004129//GO:0000287	lyase activity//terpene synthase activity//cytochrome-c oxidase activity//magnesium ion binding	GO:0005739//GO:0045277	mitochondrion//respiratory chain complex IV	--	--	UP	1.7071	1.2048e-07	blast,frame:2 start:1295 end:2653|blast,frame:3 start:567 end:917|blast,frame:1 start:961 end:1299	Category 1
Cluster-6671.13095	375.28	432.93	438.24	117.99	135.24	106.85	6.02	6.35	5.97	1.27	1.38	1.25	4142	9101552	XP_021802516.1	1536	1.9e-167	putative receptor-like protein kinase At3g47110 isoform X2 [Prunus avium]	XM_007207768.1	XM_007207768	1647	0	Prunus persica hypothetical protein (PRUPE_ppa023423mg) mRNA, partial cds	--	--	--	--	Q9SD62	703	3.4e-72	Putative receptor-like protein kinase At3g47110 OS=Arabidopsis thaliana OX=3702 GN=At3g47110 PE=3 SV=1	PF13855//PF00560//PF06644//PF00069//PF07714	Leucine rich repeat//Leucine Rich Repeat//ATP11 protein//Protein kinase domain//Protein tyrosine kinase	GO:0006468//GO:0006461	protein phosphorylation//protein complex assembly	GO:0004672//GO:0005524//GO:0005515	protein kinase activity//ATP binding//protein binding	GO:0005739	mitochondrion	--	--	UP	2.1602	1.2237e-48	blast,frame:-3 start:3225 end:2371	Category 1
Cluster-6671.13306	391	437	489	118	87	75	20.49	20.72	21.61	4.08	2.86	2.83	1471	9097874	XP_021833396.1	265	1.6e-20	MDIS1-interacting receptor like kinase 2-like [Prunus avium]	XM_007204017.1	XM_007204017	97	1.03254e-40	Prunus persica hypothetical protein (PRUPE_ppb016462mg) mRNA, partial cds	--	--	--	--	Q8VZG8	196	7.5e-14	MDIS1-interacting receptor like kinase 2 OS=Arabidopsis thaliana OX=3702 GN=MIK2 PE=1 SV=3	PF00069//PF07714	Protein kinase domain//Protein tyrosine kinase	GO:0006468	protein phosphorylation	GO:0005524//GO:0004672	ATP binding//protein kinase activity	--	--	--	--	UP	2.5973	1.5819e-54	estscan,start:1008 end:1076	Category 1
Cluster-6671.13511	68	68	86	27	31	26	1.71	1.56	1.83	0.45	0.49	0.48	2747	7214269	XP_018500439.1	3000	0	PREDICTED: G-type lectin S-receptor-like serine..threonine-protein kinase At4g27290 [Pyrus x bretschneideri]	XM_008227847.2	XM_008227847	2230	0	PREDICTED: Prunus mume G-type lectin S-receptor-like serine/threonine-protein kinase At4g27290 (LOC103325671), mRNA	--	--	--	--	O81905	1790	2.1e-198	Receptor-like serine/threonine-protein kinase SD1-8 OS=Arabidopsis thaliana OX=3702 GN=SD18 PE=1 SV=1	PF07714//PF11883//PF00954//PF06444//PF00069	Protein tyrosine kinase//Domain of unknown function (DUF3403)//S-locus glycoprotein domain//NADH dehydrogenase subunit 2 C-terminus//Protein kinase domain	GO:0009069//GO:0015992//GO:0006814//GO:0006120//GO:0006744//GO:0006468//GO:0048544//GO:0016310//GO:0055114	serine family amino acid metabolic process//proton transport//sodium ion transport//mitochondrial electron transport, NADH to ubiquinone//ubiquinone biosynthetic process//protein phosphorylation//recognition of pollen//phosphorylation//oxidation-reduction process	GO:0004672//GO:0008137//GO:0004674//GO:0005524	protein kinase activity//NADH dehydrogenase (ubiquinone) activity//protein serine/threonine kinase activity//ATP binding	--	--	--	--	UP	1.7678	6.375e-08	blast,frame:-1 start:2615 end:111	Category 1
Cluster-6671.1400	66	70	66	21	37	40	1.78	1.72	1.51	0.38	0.63	0.79	2580	10882929	PRQ46594.1	2894	0	putative nucleotidyltransferase, Ribonuclease H [Rosa chinensis]	XM_007200203.1	XM_007200203	1550	0	Prunus persica hypothetical protein (PRUPE_ppa015000mg) mRNA, complete cds	--	--	--	--	Q7LHG5	990	1.1e-105	Transposon Ty3-I Gag-Pol polyprotein OS=Saccharomyces cerevisiae (strain ATCC 204508 / S288c) OX=559292 GN=TY3B-I PE=3 SV=2	PF09668	Aspartyl protease	GO:0006508	proteolysis	GO:0004190	aspartic-type endopeptidase activity	--	--	--	--	UP	1.4122	7.8487e-05	blast,frame:-1 start:2481 end:1	Category 1
Cluster-6671.1457	14	6	15	0	0	3	1.76	0.67	1.57	0	0	0.27	783	9092953	XP_021827893.1	1239	9.9e-134	putative receptor-like protein kinase At3g47110 [Prunus avium]	XM_016796896.1	XM_016796896	717	0	PREDICTED: Prunus mume putative receptor-like protein kinase At3g47110 (LOC103342940), mRNA	--	--	--	--	C0LGP4	538	8.8e-54	Probable LRR receptor-like serine/threonine-protein kinase At3g47570 OS=Arabidopsis thaliana OX=3702 GN=At3g47570 PE=2 SV=1	PF00560//PF13855//PF00069//PF07714	Leucine Rich Repeat//Leucine rich repeat//Protein kinase domain//Protein tyrosine kinase	GO:0006468	protein phosphorylation	GO:0005524//GO:0004672//GO:0005515	ATP binding//protein kinase activity//protein binding	--	--	--	--	UP	3.8874	0.0033075	estscan,start:1 end:783	Category 1
Cluster-6671.14717	15	16	15	7	6	3	2.63	2.45	2.16	0.77	0.63	0.36	643	9086425	XP_021820709.1	212	9.9e-15	LON peptidase N-terminal domain and RING finger protein 1 isoform X2 [Prunus avium]	DQ863257.1	DQ863257	246	6.4992e-124	Prunus persica clone BAC PpN089G02 evergrowing gene locus, complete sequence	--	--	--	--	--	--	--	--	PF02347	Glycine cleavage system P-protein	GO:0006546//GO:0055114//GO:0006563//GO:0006566//GO:0006544	glycine catabolic process//oxidation-reduction process//L-serine metabolic process//threonine metabolic process//glycine metabolic process	GO:0004375	glycine dehydrogenase (decarboxylating) activity	--	--	--	--	UP	1.9012	0.019118	--	Category 1
Cluster-6671.1503	365	400.78	418	181	166	166	7.4	7.42	7.19	2.45	2.14	2.45	3338	6534887	XP_016649199.1	599	6.9e-59	PREDICTED: SNF1-related protein kinase regulatory subunit beta-2-like [Prunus mume]	XM_016793713.1	XM_016793713	427	0	PREDICTED: Prunus mume SNF1-related protein kinase regulatory subunit beta-2-like (LOC103329280), mRNA	K07199	PRKAB	5'-AMP-activated protein kinase, regulatory beta subunit	http://www.genome.jp/dbget-bin/www_bget?ko:K07199	Q9SCY5	278	5.3e-23	SNF1-related protein kinase regulatory subunit beta-2 OS=Arabidopsis thaliana OX=3702 GN=KINB2 PE=1 SV=1	PF04739//PF00770	5'-AMP-activated protein kinase beta subunit, interaction domain//Adenovirus endoprotease	GO:0006508	proteolysis	GO:0005515//GO:0004197	protein binding//cysteine-type endopeptidase activity	--	--	KOG1616	Protein involved in Snf1 protein kinase complex assembly	UP	1.5712	4.9089e-28	blast,frame:-1 start:2996 end:2619|blast,frame:-2 start:676 end:263	Category 1
Cluster-6671.15486	0	0	0	38	26	12	0	0	0	1.37	0.89	0.47	1419	7852949	ONI03533.1	976	5.6e-103	hypothetical protein PRUPE_6G263100 [Prunus persica]	XM_007207513.1	XM_007207513	1152	0	Prunus persica hypothetical protein (PRUPE_ppa018327mg) mRNA, complete cds	--	--	--	--	Q9FLV4	347	2.2e-31	G-type lectin S-receptor-like serine/threonine-protein kinase At5g24080 OS=Arabidopsis thaliana OX=3702 GN=At5g24080 PE=2 SV=1	PF07714//PF07973//PF00069	Protein tyrosine kinase//Threonyl and Alanyl tRNA synthetase second additional domain//Protein kinase domain	GO:0043039//GO:0006468	tRNA aminoacylation//protein phosphorylation	GO:0016876//GO:0005524//GO:0004672	ligase activity, forming aminoacyl-tRNA and related compounds//ATP binding//protein kinase activity	--	--	--	--	DOWN	-6.7267	4.2167e-06	blast,frame:-2 start:875 end:549	Category 1
Cluster-6671.15753	393.08	436	496	44.01	32.01	29.01	8.39	8.49	8.98	0.63	0.43	0.45	3186	8266394	XP_020417193.1	2553	1.7e-285	LOW QUALITY PROTEIN: uncharacterized protein LOC18781188 [Prunus persica]	XM_007214010.1	XM_007214010	1300	0	Prunus persica hypothetical protein (PRUPE_ppa017664mg) mRNA, complete cds	--	--	--	--	Q9SYA0	1192	5.2e-129	G-type lectin S-receptor-like serine/threonine-protein kinase At1g61500 OS=Arabidopsis thaliana OX=3702 GN=At1g61500 PE=2 SV=2	PF07714//PF00069//PF11883//PF00954	Protein tyrosine kinase//Protein kinase domain//Domain of unknown function (DUF3403)//S-locus glycoprotein domain	GO:0009069//GO:0016310//GO:0006468//GO:0048544	serine family amino acid metabolic process//phosphorylation//protein phosphorylation//recognition of pollen	GO:0004674//GO:0004672//GO:0005524	protein serine/threonine kinase activity//protein kinase activity//ATP binding	--	--	--	--	UP	4.0211	1.0225e-92	blast,frame:-2 start:809 end:273	Category 1
Cluster-6671.15761	173	183	190	57	95	70	4.46	4.3	4.15	0.98	1.55	1.31	2688	3495136	XP_008224903.1	3884	0	PREDICTED: G-type lectin S-receptor-like serine..threonine-protein kinase SD1-29 [Prunus mume]	XM_008226681.2	XM_008226681	2206	0	PREDICTED: Prunus mume G-type lectin S-receptor-like serine/threonine-protein kinase SD1-29 (LOC103324605), mRNA	--	--	--	--	O64782	1896	1e-210	G-type lectin S-receptor-like serine/threonine-protein kinase SD1-29 OS=Arabidopsis thaliana OX=3702 GN=SD129 PE=1 SV=1	PF00008//PF00954//PF00069//PF07714	EGF-like domain//S-locus glycoprotein domain//Protein kinase domain//Protein tyrosine kinase	GO:0006468//GO:0048544	protein phosphorylation//recognition of pollen	GO:0004672//GO:0005524//GO:0005515	protein kinase activity//ATP binding//protein binding	--	--	--	--	UP	1.6726	9.8176e-15	estscan,start:442 end:2688	Category 1
Cluster-6671.1626	85	92	109	71	49	59	6.37	6.2	6.86	3.48	2.28	3.16	1117	9073905	XP_021806768.1	1210	3.3e-130	uncharacterized protein LOC110750708 [Prunus avium]	XM_008241149.2	XM_008241149	1015	0	PREDICTED: Prunus mume uncharacterized LOC103337975 (LOC103337975), mRNA	--	--	--	--	--	--	--	--	PF01080	Presenilin	--	--	GO:0004190	aspartic-type endopeptidase activity	GO:0016021	integral component of membrane	--	--	UP	1.0326	0.00031931	blast,frame:-1 start:1069 end:164	Category 1
Cluster-6671.1667	132	131	155	65	81	50	3.39	3.06	3.37	1.11	1.32	0.93	2699	3498016	XP_008228993.1	4072	0	PREDICTED: G-type lectin S-receptor-like serine..threonine-protein kinase At2g19130 [Prunus mume]	XM_008230771.1	XM_008230771	2673	0	PREDICTED: Prunus mume G-type lectin S-receptor-like serine/threonine-protein kinase At2g19130 (LOC103328381), mRNA	--	--	--	--	O64477	1890	5.1e-210	G-type lectin S-receptor-like serine/threonine-protein kinase At2g19130 OS=Arabidopsis thaliana OX=3702 GN=At2g19130 PE=2 SV=1	PF07714//PF00069//PF00954//PF04805	Protein tyrosine kinase//Protein kinase domain//S-locus glycoprotein domain//E10-like protein conserved region	GO:0006468//GO:0048544//GO:0055114	protein phosphorylation//recognition of pollen//oxidation-reduction process	GO:0004672//GO:0016972//GO:0005524	protein kinase activity//thiol oxidase activity//ATP binding	--	--	--	--	UP	1.4666	5.2107e-10	blast,frame:3 start:66 end:2513	Category 1
Cluster-6671.16705	30	34	34	130	158	101	0.79	0.81	0.76	2.27	2.62	1.92	2649	6537221	XP_016651323.1	1945	4.6e-215	PREDICTED: LEAF RUST 10 DISEASE-RESISTANCE LOCUS RECEPTOR-LIKE PROTEIN KINASE-like 1.2 isoform X2 [Prunus mume]	XM_016795836.1	XM_016795836	1334	0	PREDICTED: Prunus mume LEAF RUST 10 DISEASE-RESISTANCE LOCUS RECEPTOR-LIKE PROTEIN KINASE-like 1.2 (LOC103338835), transcript variant X1, mRNA	--	--	--	--	P0C5E2	1196	1.5e-129	LEAF RUST 10 DISEASE-RESISTANCE LOCUS RECEPTOR-LIKE PROTEIN KINASE-like 1.2 OS=Arabidopsis thaliana OX=3702 GN=LRK10L-1.2 PE=2 SV=3	PF00069//PF07714	Protein kinase domain//Protein tyrosine kinase	GO:0006468	protein phosphorylation	GO:0005524//GO:0004672	ATP binding//protein kinase activity	--	--	--	--	DOWN	-1.613	2.8459e-08	blast,frame:-3 start:1468 end:191|blast,frame:-1 start:2454 end:1576	Category 1
Cluster-6671.17125	263	338	367	97	139	96	4.21	4.94	4.99	1.04	1.42	1.12	4150	3498371	XP_008229511.1	5307	0	PREDICTED: SNF2 domain-containing protein CLASSY 4-like [Prunus mume]	XM_007210351.1	XM_007210351	2938	0	Prunus persica hypothetical protein (PRUPE_ppa000588mg) mRNA, complete cds	K10875	RAD54L, RAD54	DNA repair and recombination protein RAD54 and RAD54-like protein	http://www.genome.jp/dbget-bin/www_bget?ko:K10875	F4I8S3	1566	2.9e-172	SNF2 domain-containing protein CLASSY 3 OS=Arabidopsis thaliana OX=3702 GN=CLSY3 PE=1 SV=1	PF15339//PF10717//PF00176//PF04851	Acrosome formation-associated factor//Occlusion-derived virus envelope protein ODV-E18//SNF2 family N-terminal domain//Type III restriction enzyme, res subunit	GO:0060478//GO:0006897//GO:0007342	acrosomal vesicle exocytosis//endocytosis//fusion of sperm to egg plasma membrane	GO:0003677//GO:0016787//GO:0005524	DNA binding//hydrolase activity//ATP binding	GO:0019031//GO:0005886	viral envelope//plasma membrane	KOG0390	DNA repair protein, SNF2 family	UP	1.9112	1.6252e-28	blast,frame:3 start:90 end:3821	Category 1
Cluster-6671.17438	0	0	0	10	10	1	0	0	0	0.95	0.9	0.1	705	--	--	--	--	--	XM_001936092.1	XM_001936092	200	2.66823e-98	Pyrenophora tritici-repentis Pt-1C-BFP hypothetical protein, mRNA	--	--	--	--	--	--	--	--	PF01080	Presenilin	--	--	GO:0004190	aspartic-type endopeptidase activity	GO:0016021	integral component of membrane	--	--	DOWN	-4.8488	0.017555	estscan,start:1 end:646	Category 1
Cluster-6671.17755	99	84	105	39	36.32	34	2.52	1.95	2.26	0.66	0.59	0.63	2722	3506058	XP_008240239.1	3217	0	PREDICTED: LEAF RUST 10 DISEASE-RESISTANCE LOCUS RECEPTOR-LIKE PROTEIN KINASE-like 2.1 [Prunus mume]	XM_008242017.2	XM_008242017	2434	0	PREDICTED: Prunus mume LEAF RUST 10 DISEASE-RESISTANCE LOCUS RECEPTOR-LIKE PROTEIN KINASE-like 2.1 (LOC103338769), mRNA	--	--	--	--	F4HQ20	1180	1.1e-127	LEAF RUST 10 DISEASE-RESISTANCE LOCUS RECEPTOR-LIKE PROTEIN KINASE-like 2.5 OS=Arabidopsis thaliana OX=3702 GN=LRK10L-2.5 PE=3 SV=1	PF00069//PF07714//PF07887//PF05445//PF04075//PF06635	Protein kinase domain//Protein tyrosine kinase//Calmodulin binding protein-like//Poxvirus serine/threonine protein kinase//Domain of unknown function (DUF385)//Nodulation protein NolV	GO:0006950//GO:0055114//GO:0009877//GO:0006468	response to stress//oxidation-reduction process//nodulation//protein phosphorylation	GO:0004672//GO:0005516//GO:0016491//GO:0005524	protein kinase activity//calmodulin binding//oxidoreductase activity//ATP binding	--	--	--	--	UP	1.7702	1.0158e-09	blast,frame:1 start:541 end:2514	Category 1
Cluster-6671.18064	114.08	102.07	102.01	0	4	1	2.12	1.73	1.61	0	0.05	0.01	3617	10959837	XP_024163761.1	1296	1.1e-139	uncharacterized protein LOC112170658 [Rosa chinensis]	XR_514497.2	XR_514497	330	7.7026e-170	PREDICTED: Prunus mume uncharacterized LOC103337352 (LOC103337352), ncRNA	--	--	--	--	Q940S3	156	8e-09	UDP-N-acetylglucosamine diphosphorylase 1 OS=Arabidopsis thaliana OX=3702 GN=GLCNAC1PUT1 PE=1 SV=1	PF02902	Ulp1 protease family, C-terminal catalytic domain	GO:0006508	proteolysis	GO:0008234	cysteine-type peptidase activity	--	--	--	--	UP	6.3715	1.7658e-18	blast,frame:-3 start:2475 end:1315	Category 1
Cluster-6671.18237	90	110	92	61	58	66	2.8	3.11	2.42	1.26	1.14	1.49	2278	7207704	XP_018504290.1	2844	0	PREDICTED: putative pentatricopeptide repeat-containing protein At5g65820 [Pyrus x bretschneideri]	XM_008239187.2	XM_008239187	2186	0	PREDICTED: Prunus mume pentatricopeptide repeat-containing protein At3g49730 (LOC103336155), mRNA	--	--	--	--	P0C8A0	2081	3.1e-232	Pentatricopeptide repeat-containing protein At3g49730 OS=Arabidopsis thaliana OX=3702 GN=At3g49730 PE=2 SV=1	PF02284	Cytochrome c oxidase subunit Va	GO:0006123//GO:0015992	mitochondrial electron transport, cytochrome c to oxygen//proton transport	GO:0004129	cytochrome-c oxidase activity	GO:0005743//GO:0045277	mitochondrial inner membrane//respiratory chain complex IV	--	--	UP	1.0233	0.00022109	blast,frame:2 start:98 end:2035	Category 1
Cluster-6671.18411	8	3	14	35	40	24	0.32	0.11	0.47	0.93	1.01	0.69	1839	9097097	XP_021832519.1	2568	1.8e-287	wall-associated receptor kinase 1-like [Prunus avium]	XM_007212688.1	XM_007212688	933	0	Prunus persica hypothetical protein (PRUPE_ppa016617mg) mRNA, partial cds	--	--	--	--	Q9LMN7	1024	9.1e-110	Wall-associated receptor kinase 5 OS=Arabidopsis thaliana OX=3702 GN=WAK5 PE=2 SV=1	PF00008//PF07714//PF00069//PF07645	EGF-like domain//Protein tyrosine kinase//Protein kinase domain//Calcium-binding EGF domain	GO:0006468	protein phosphorylation	GO:0004672//GO:0005509//GO:0005524//GO:0005515	protein kinase activity//calcium ion binding//ATP binding//protein binding	--	--	--	--	DOWN	-1.6199	0.013925	blast,frame:1 start:1 end:1713	Category 1
Cluster-6671.18521	22	38	35	9	4	9	2.34	3.6	3.1	0.62	0.26	0.68	874	8271917	XP_007207710.2	719	2.2e-73	uncharacterized protein LOC18774347 [Prunus persica]	XM_008239467.2	XM_008239467	815	0	PREDICTED: Prunus mume uncharacterized LOC103336427 (LOC103336427), mRNA	--	--	--	--	--	--	--	--	PF06553	BNIP3	GO:0043065	positive regulation of apoptotic process	--	--	GO:0005740//GO:0016021	mitochondrial envelope//integral component of membrane	--	--	UP	2.4552	3.0957e-05	blast,frame:-1 start:691 end:200	Category 1
Cluster-6671.19015	128	156	167	67	86	57	3.1	3.45	3.43	1.08	1.32	1.01	2839	6531769	XP_016647420.1	3374	0	PREDICTED: LOW QUALITY PROTEIN: putative U-box domain-containing protein 50 [Prunus mume]	XM_016791934.1	XM_016791934	2068	0	PREDICTED: Prunus mume putative U-box domain-containing protein 50 (LOC103335911), mRNA	--	--	--	--	Q9FGD7	1348	3.8e-147	Putative U-box domain-containing protein 50 OS=Arabidopsis thaliana OX=3702 GN=PUB50 PE=3 SV=1	PF00069//PF16517//PF07714	Protein kinase domain//Novel Ras effector 1 C-terminal SARAH (Sav/Rassf/Hpo) domain//Protein tyrosine kinase	GO:0006468//GO:0007165	protein phosphorylation//signal transduction	GO:0005524//GO:0004672	ATP binding//protein kinase activity	--	--	--	--	UP	1.4725	6.7572e-11	blast,frame:2 start:2363 end:2461|blast,frame:3 start:216 end:2381	Category 1
Cluster-6671.19291	160.92	210.75	211.37	28	23	31.1	5.57	6.64	6.2	0.64	0.5	0.78	2075	3501783	XP_008234308.1	2780	0	PREDICTED: protein HOTHEAD-like [Prunus mume]	XM_008236086.1	XM_008236086	1700	0	PREDICTED: Prunus mume protein HOTHEAD-like (LOC103333269), mRNA	--	--	--	--	Q9S746	1313	3.2e-143	Protein HOTHEAD OS=Arabidopsis thaliana OX=3702 GN=HTH PE=1 SV=1	PF05445//PF01266//PF05199//PF00732//PF05834//PF07992	Poxvirus serine/threonine protein kinase//FAD dependent oxidoreductase//GMC oxidoreductase//GMC oxidoreductase//Lycopene cyclase protein//Pyridine nucleotide-disulphide oxidoreductase	GO:0016117//GO:0055114	carotenoid biosynthetic process//oxidation-reduction process	GO:0016614//GO:0016491//GO:0004672//GO:0050660//GO:0016705//GO:0005524	oxidoreductase activity, acting on CH-OH group of donors//oxidoreductase activity//protein kinase activity//flavin adenine dinucleotide binding//oxidoreductase activity, acting on paired donors, with incorporation or reduction of molecular oxygen//ATP binding	--	--	--	--	UP	3.1878	1.1583e-36	blast,frame:3 start:1944 end:2024|blast,frame:2 start:107 end:1909	Category 1
Cluster-6671.19462	19	32	18	6	14	14.02	2.44	3.64	1.92	0.49	1.09	1.27	773	6535950	XP_016650133.1	981	8.1e-104	PREDICTED: putative disease resistance RPP13-like protein 1 [Prunus mume]	XM_008233527.2	XM_008233527	743	0	PREDICTED: Prunus mume putative disease resistance RPP13-like protein 1 (LOC103330907), transcript variant X5, mRNA	--	--	--	--	Q9LRR4	296	1e-25	Putative disease resistance RPP13-like protein 1 OS=Arabidopsis thaliana OX=3702 GN=RPPL1 PE=3 SV=1	PF00580//PF08826//PF00931	UvrD/REP helicase N-terminal domain//DMPK coiled coil domain like//NB-ARC domain	GO:0009069//GO:0016310//GO:0006468	serine family amino acid metabolic process//phosphorylation//protein phosphorylation	GO:0004674//GO:0005524//GO:0043531	protein serine/threonine kinase activity//ATP binding//ADP binding	--	--	--	--	UP	1.3924	0.037142	estscan,start:1 end:773	Category 1
Cluster-6671.19494	91	81	98	335	372.95	326	0.83	0.68	0.77	2.06	2.19	2.19	7019	5615985	YP_009176018.1	1665	3.6e-182	cytochrome f ..chloroplast.. [Ficus racemosa]	HQ336405.1	HQ336405	4746	0	Prunus persica chloroplast, complete genome	K02634	petA	apocytochrome f	http://www.genome.jp/dbget-bin/www_bget?ko:K02634	Q09X04	1563	1.1e-171	Cytochrome f OS=Morus indica OX=248361 GN=petA PE=3 SV=1	PF13833//PF03040//PF13499//PF01333//PF00283//PF15333//PF00284//PF10591//PF13405//PF01788//PF05379//PF12763//PF00036//PF00404//PF02617//PF13202	EF-hand domain pair//CemA family//EF-hand domain pair//Apocytochrome F, C-terminal//Cytochrome b559, alpha (gene psbE) and beta (gene psbF)subunits//TATA box-binding protein-associated factor 1D//Lumenal portion of Cytochrome b559, alpha (gene psbE) subunit//Secreted protein acidic and rich in cysteine Ca binding region//EF-hand domain//PsbJ//Carlavirus endopeptidase//Cytoskeletal-regulatory comp…	GO:0005975//GO:0015979//GO:0007165//GO:0006118//GO:0006355//GO:0030163//GO:0006144	carbohydrate metabolic process//photosynthesis//signal transduction//obsolete electron transport//regulation of transcription, DNA-templated//protein catabolic process//purine nucleobase metabolic process	GO:0046872//GO:0016817//GO:0005506//GO:0003968//GO:0009055//GO:0005515//GO:0005509//GO:0004553//GO:0020037	metal ion binding//hydrolase activity, acting on acid anhydrides//iron ion binding//RNA-directed RNA polymerase activity//electron carrier activity//protein binding//calcium ion binding//hydrolase activity, hydrolyzing O-glycosyl compounds//heme binding	GO:0005668//GO:0016020//GO:0031379//GO:0031361//GO:0009539//GO:0009523//GO:0005578//GO:0016021//GO:0005634	RNA polymerase transcription factor SL1 complex//membrane//RNA-directed RNA polymerase complex//integral component of thylakoid membrane//photosystem II reaction center//photosystem II//proteinaceous extracellular matrix//integral component of membrane//nucleus	--	--	DOWN	-1.5682	1.4653e-19	estscan,start:6188 end:6754	Category 1
Cluster-6671.19853	18	8	5	58.69	41.96	43	1.06	0.43	0.25	2.28	1.55	1.82	1340	3508551	XP_008243678.1	1190	8.2e-128	PREDICTED: G-type lectin S-receptor-like serine..threonine-protein kinase RLK1 [Prunus mume]	XM_008245456.1	XM_008245456	705	0	PREDICTED: Prunus mume G-type lectin S-receptor-like serine/threonine-protein kinase RLK1 (LOC103341904), mRNA	--	--	--	--	Q0JEU6	706	5e-73	G-type lectin S-receptor-like serine/threonine-protein kinase LECRK3 OS=Oryza sativa subsp. japonica OX=39947 GN=LECRK3 PE=3 SV=2	PF05445//PF07714//PF00069	Poxvirus serine/threonine protein kinase//Protein tyrosine kinase//Protein kinase domain	GO:0006468	protein phosphorylation	GO:0004672//GO:0005524	protein kinase activity//ATP binding	--	--	--	--	DOWN	-1.8243	0.0011806	blast,frame:1 start:1 end:705	Category 1
Cluster-6671.20009	5	11	11	0	1	1	0.82	1.58	1.49	0	0.1	0.11	667	7807014	OMO84418.1	182	3.1e-11	hypothetical protein COLO4_22084 [Corchorus olitorius]	XM_008243449.2	XM_008243449	94	2.11827e-39	PREDICTED: Prunus mume random slug protein 5 (LOC103340084), mRNA	--	--	--	--	--	--	--	--	PF05392	Cytochrome C oxidase chain VIIB	GO:0015992//GO:0006123	proton transport//mitochondrial electron transport, cytochrome c to oxygen	GO:0004129	cytochrome-c oxidase activity	GO:0045277//GO:0005746	respiratory chain complex IV//mitochondrial respiratory chain	--	--	UP	4.1064	0.0082434	blast,frame:1 start:364 end:630	Category 1
Cluster-6671.20218	21	14	7	53	62	64	0.8	0.49	0.23	1.34	1.49	1.77	1909	3490625	XP_008218579.1	2222	2.5e-247	PREDICTED: ammonium transporter 1 member 4-like [Prunus mume]	XM_008220357.2	XM_008220357	1542	0	PREDICTED: Prunus mume ammonium transporter 1 member 4-like (LOC103318911), mRNA	K03320	amt, AMT, MEP	ammonium transporter, Amt family	http://www.genome.jp/dbget-bin/www_bget?ko:K03320	Q9SVT8	1761	3.3e-195	Ammonium transporter 1 member 4 OS=Arabidopsis thaliana OX=3702 GN=AMT1-4 PE=1 SV=1	PF00909//PF11808	Ammonium Transporter Family//Domain of unknown function (DUF3329)	GO:0016310//GO:0015696	phosphorylation//ammonium transport	GO:0004673//GO:0008519	protein histidine kinase activity//ammonium transmembrane transporter activity	GO:0009365//GO:0016020	protein histidine kinase complex//membrane	KOG0682	Ammonia permease	DOWN	-1.7041	0.0003735	blast,frame:-1 start:1729 end:173	Category 1
Cluster-6671.20315	1036	1327	1147.99	14	18	5	19.14	22.39	18.01	0.17	0.21	0.07	3634	6536964	XP_016651097.1	2318	3.5e-258	PREDICTED: respiratory burst oxidase homolog protein F-like [Prunus mume]	XM_016795611.1	XM_016795611	1432	0	PREDICTED: Prunus mume respiratory burst oxidase homolog protein F-like (LOC103338602), mRNA	K13447	RBOH	respiratory burst oxidase	http://www.genome.jp/dbget-bin/www_bget?ko:K13447	Q948U0	907	6.7e-96	Respiratory burst oxidase homolog protein A OS=Solanum tuberosum OX=4113 GN=RBOHA PE=1 SV=1	PF13405//PF08414//PF00036//PF08030//PF08022//PF13499//PF13202	EF-hand domain//Respiratory burst NADPH oxidase//EF hand//Ferric reductase NAD binding domain//FAD-binding domain//EF-hand domain pair//EF hand	GO:0055114//GO:0006979//GO:0006804	oxidation-reduction process//response to oxidative stress//obsolete peroxidase reaction	GO:0005509//GO:0050664//GO:0016491//GO:0004601	calcium ion binding//oxidoreductase activity, acting on NAD(P)H, oxygen as acceptor//oxidoreductase activity//peroxidase activity	--	--	--	--	UP	6.9398	4.6293e-152	blast,frame:2 start:3242 end:3442|blast,frame:3 start:456 end:1958	Category 1
Cluster-6671.20336	11	17	15	2	7	3	0.8	1.11	0.92	0.1	0.32	0.16	1143	--	--	--	--	--	XM_008226684.2	XM_008226684	1051	0	PREDICTED: Prunus mume uncharacterized LOC103324607 (LOC103324607), mRNA	--	--	--	--	O64771	909	1.2e-96	G-type lectin S-receptor-like serine/threonine-protein kinase At1g61480 OS=Arabidopsis thaliana OX=3702 GN=At1g61480 PE=2 SV=2	PF00008//PF00069//PF00954//PF15050//PF07714	EGF-like domain//Protein kinase domain//S-locus glycoprotein domain//SCIMP protein//Protein tyrosine kinase	GO:0048544//GO:0006468	recognition of pollen//protein phosphorylation	GO:0005515//GO:0005524//GO:0004672	protein binding//ATP binding//protein kinase activity	GO:0016021//GO:0001772//GO:0097197	integral component of membrane//immunological synapse//tetraspanin-enriched microdomain	--	--	UP	2.2204	0.012396	estscan,start:1 end:1143	Category 1
Cluster-6671.20378	657	781	879	2	5	5	11.15	12.11	12.67	0.02	0.05	0.06	3930	7865556	ONI16140.1	4048	0	hypothetical protein PRUPE_3G080600 [Prunus persica]	XM_007214861.1	XM_007214861	2266	0	Prunus persica hypothetical protein (PRUPE_ppa001212mg) mRNA, complete cds	K13459	RPS2	disease resistance protein RPS2	http://www.genome.jp/dbget-bin/www_bget?ko:K13459	Q8RXS5	1662	2e-183	Probable disease resistance protein At5g63020 OS=Arabidopsis thaliana OX=3702 GN=At5g63020 PE=2 SV=2	PF00931//PF17001//PF09496//PF01637//PF03623//PF01080//PF05970//PF00861//PF02468//PF13855	NB-ARC domain//Type III secretion basal body protein I, YscI, HrpB, PscI//Cenp-O kinetochore centromere component//Archaeal ATPase//Focal adhesion targeting region//Presenilin//PIF1-like helicase//Ribosomal L18p/L5e family//Photosystem II reaction centre N protein (psbN)//Leucine rich repeat	GO:0006281//GO:0034508//GO:0006412//GO:0007172//GO:0007165//GO:0000723//GO:0015979//GO:0009306//GO:0042254//GO:0006468	DNA repair//centromere complex assembly//translation//signal complex assembly//signal transduction//telomere maintenance//photosynthesis//protein secretion//ribosome biogenesis//protein phosphorylation	GO:0004713//GO:0004871//GO:0005515//GO:0005524//GO:0003678//GO:0003735//GO:0004190//GO:0043531	protein tyrosine kinase activity//signal transducer activity//protein binding//ATP binding//DNA helicase activity//structural constituent of ribosome//aspartic-type endopeptidase activity//ADP binding	GO:0005657//GO:0000776//GO:0016021//GO:0009523//GO:0005622//GO:0009539//GO:0005925//GO:0016020//GO:0005840	replication fork//kinetochore//integral component of membrane//photosystem II//intracellular//photosystem II reaction center//focal adhesion//membrane//ribosome	--	--	UP	7.9559	8.0634e-74	blast,frame:2 start:32 end:2755	Category 1
Cluster-6671.20734	44	14	38	0	0	0	1.93	0.56	1.41	0	0	0	1701	3502924	XP_008235788.1	874	4.6e-91	PREDICTED: DNA topoisomerase 6 subunit A3-like [Prunus mume]	XM_008237566.1	XM_008237566	373	0	PREDICTED: Prunus mume DNA topoisomerase 6 subunit A3-like (LOC103334594), mRNA	K10878	SPO11	meiotic recombination protein SPO11	http://www.genome.jp/dbget-bin/www_bget?ko:K10878	A2XFC1	574	1.3e-57	DNA topoisomerase 6 subunit A3 OS=Oryza sativa subsp. indica OX=39946 GN=TOP6A3 PE=1 SV=2	PF04406//PF01805//PF00433	Type IIB DNA topoisomerase//Surp module//Protein kinase C terminal domain	GO:0009069//GO:0006396//GO:0006259//GO:0006468//GO:0016310	serine family amino acid metabolic process//RNA processing//DNA metabolic process//protein phosphorylation//phosphorylation	GO:0003824//GO:0003677//GO:0004674//GO:0003723//GO:0005524	catalytic activity//DNA binding//protein serine/threonine kinase activity//RNA binding//ATP binding	GO:0005694	chromosome	KOG2795	Catalytic subunit of the meiotic double strand break transesterase	UP	7.821	1.6799e-08	blast,frame:-1 start:1578 end:241	Category 1
Cluster-6671.2087	30	14	19	138	157	111	0.63	0.27	0.34	1.94	2.09	1.7	3232	3491814	XP_008220287.1	4740	0	PREDICTED: putative receptor-like protein kinase At3g47110 [Prunus mume]	XM_008222065.2	XM_008222065	2961	0	PREDICTED: Prunus mume putative receptor-like protein kinase At3g47110 (LOC103320388), mRNA	--	--	--	--	C0LGP4	1687	2.1e-186	Probable LRR receptor-like serine/threonine-protein kinase At3g47570 OS=Arabidopsis thaliana OX=3702 GN=At3g47570 PE=2 SV=1	PF00069//PF00560//PF09773//PF07714//PF13855	Protein kinase domain//Leucine Rich Repeat//Meckelin (Transmembrane protein 67)//Protein tyrosine kinase//Leucine rich repeat	GO:0042384//GO:0010826//GO:0006468	cilium assembly//negative regulation of centrosome duplication//protein phosphorylation	GO:0005515//GO:0005524//GO:0004672	protein binding//ATP binding//protein kinase activity	GO:0036038	TCTN-B9D complex	--	--	DOWN	-2.3024	2.8429e-12	blast,frame:1 start:52 end:3111	Category 1
Cluster-6671.21165	2	1	8	0	0	0	0.48	0.21	1.56	0	0	0	545	8270030	XP_020420577.1	160	9e-09	uncharacterized protein LOC109949445 [Prunus persica]	XM_007207242.1	XM_007207242	56	2.27552e-18	Prunus persica hypothetical protein (PRUPE_ppa000086mg) mRNA, complete cds	--	--	--	--	--	--	--	--	PF00112	Papain family cysteine protease	GO:0006508	proteolysis	GO:0008234	cysteine-type peptidase activity	--	--	--	--	UP	4.6358	0.048854	blast,frame:-1 start:470 end:198	Category 1
Cluster-6671.21251	262	287.22	319	71.14	70.11	77	6.02	6.02	6.22	1.09	1.02	1.29	2978	--	--	--	--	--	XM_016793619.1	XM_016793619	2512	0	PREDICTED: Prunus mume protein STRUBBELIG-RECEPTOR FAMILY 5 (LOC103327526), mRNA	--	--	--	--	Q6R2K1	1183	5.4e-128	Protein STRUBBELIG-RECEPTOR FAMILY 5 OS=Arabidopsis thaliana OX=3702 GN=SRF5 PE=2 SV=1	PF00560//PF00069//PF00335//PF13855//PF07714	Leucine Rich Repeat//Protein kinase domain//Tetraspanin family//Leucine rich repeat//Protein tyrosine kinase	GO:0006468	protein phosphorylation	GO:0005515//GO:0005524//GO:0004672	protein binding//ATP binding//protein kinase activity	GO:0016021	integral component of membrane	--	--	UP	2.3554	4.9953e-39	blast,frame:2 start:389 end:2578	Category 1
Cluster-6671.21632	212	256	255.84	157	131	171.99	4.75	5.23	4.86	2.35	1.86	2.81	3049	6534284	XP_016648623.1	3475	0	PREDICTED: G-type lectin S-receptor-like serine..threonine-protein kinase At1g11410 [Prunus mume]	XM_016793137.1	XM_016793137	1947	0	PREDICTED: Prunus mume G-type lectin S-receptor-like serine/threonine-protein kinase At1g11410 (LOC103324693), mRNA	--	--	--	--	Q9LPZ3	1976	6.2e-220	G-type lectin S-receptor-like serine/threonine-protein kinase At1g11410 OS=Arabidopsis thaliana OX=3702 GN=At1g11410 PE=3 SV=3	PF00954//PF00069//PF11883//PF07714	S-locus glycoprotein domain//Protein kinase domain//Domain of unknown function (DUF3403)//Protein tyrosine kinase	GO:0016310//GO:0048544//GO:0006468//GO:0009069	phosphorylation//recognition of pollen//protein phosphorylation//serine family amino acid metabolic process	GO:0005524//GO:0004672//GO:0004674	ATP binding//protein kinase activity//protein serine/threonine kinase activity	--	--	--	--	UP	1.0105	8.7643e-08	blast,frame:2 start:2297 end:2785|blast,frame:3 start:54 end:2183	Category 1
Cluster-6671.21684	4	4	10	25	24	18	0.26	0.23	0.55	1.07	0.97	0.84	1242	7206326	XP_009356233.2	1518	7e-166	PREDICTED: LEAF RUST 10 DISEASE-RESISTANCE LOCUS RECEPTOR-LIKE PROTEIN KINASE-like 2.1 [Pyrus x bretschneideri]	XM_008245049.2	XM_008245049	1057	0	PREDICTED: Prunus mume LEAF RUST 10 DISEASE-RESISTANCE LOCUS RECEPTOR-LIKE PROTEIN KINASE-like 2.4 (LOC103341514), transcript variant X2, mRNA	--	--	--	--	P93604	922	4.1e-98	Rust resistance kinase Lr10 OS=Triticum aestivum OX=4565 GN=LRK10 PE=2 SV=1	PF00069//PF07714	Protein kinase domain//Protein tyrosine kinase	GO:0006468	protein phosphorylation	GO:0004672//GO:0005524	protein kinase activity//ATP binding	--	--	--	--	DOWN	-1.5427	0.048652	blast,frame:3 start:3 end:1151	Category 1
Cluster-6671.21769	134	142	160.95	0	0	0	2.7	2.61	2.75	0	0	0	3355	3509300	XP_008244766.1	2262	1e-251	PREDICTED: LOW QUALITY PROTEIN: probable LRR receptor-like serine..threonine-protein kinase At1g05700 [Prunus mume]	XM_007216129.1	XM_007216129	1188	0	Prunus persica hypothetical protein (PRUPE_ppa015946mg) mRNA, complete cds	--	--	--	--	O64483	1065	2.9e-114	Senescence-induced receptor-like serine/threonine-protein kinase OS=Arabidopsis thaliana OX=3702 GN=SIRK PE=2 SV=1	PF07714//PF00069//PF13855	Protein tyrosine kinase//Protein kinase domain//Leucine rich repeat	GO:0006468	protein phosphorylation	GO:0005524//GO:0004672//GO:0005515	ATP binding//protein kinase activity//protein binding	--	--	--	--	UP	9.9932	1.596e-15	blast,frame:2 start:1682 end:3298|blast,frame:1 start:280 end:1506	Category 1
Cluster-6671.22002	69	78	64	0	1	2	3.41	3.49	2.67	0	0.03	0.07	1541	7869351	ONI19935.1	1606	5.4e-176	hypothetical protein PRUPE_3G306000 [Prunus persica]	XM_007216822.1	XM_007216822	945	0	Prunus persica hypothetical protein (PRUPE_ppa020857mg) mRNA, partial cds	--	--	--	--	Q9FIM0	219	1.7e-16	Agamous-like MADS-box protein AGL82 OS=Arabidopsis thaliana OX=3702 GN=AGL82 PE=1 SV=1	PF03740//PF00319//PF15307//PF05995	Pyridoxal phosphate biosynthesis protein PdxJ//SRF-type transcription factor (DNA-binding and dimerisation domain)//Sperm acrosome-associated protein 7//Cysteine dioxygenase type I	GO:0019530//GO:0055114//GO:0006534//GO:0046439//GO:0008615	taurine metabolic process//oxidation-reduction process//cysteine metabolic process//L-cysteine metabolic process//pyridoxine biosynthetic process	GO:0033856//GO:0005506//GO:0017172//GO:0046983//GO:0003677	pyridoxine 5'-phosphate synthase activity//iron ion binding//cysteine dioxygenase activity//protein dimerization activity//DNA binding	GO:0001669//GO:0005737	acrosomal vesicle//cytoplasm	--	--	UP	6.5085	4.351e-12	blast,frame:-2 start:1252 end:95	Category 1
Cluster-6671.22236	62	72	87	18	17	19	2.18	2.31	2.59	0.42	0.38	0.49	2045	--	--	--	--	--	XM_008226174.1	XM_008226174	1704	0	PREDICTED: Prunus mume serine/threonine-protein kinase BLUS1-like (LOC103324138), mRNA	--	--	--	--	O23304	1212	1.6e-131	Serine/threonine-protein kinase BLUS1 OS=Arabidopsis thaliana OX=3702 GN=BLUS1 PE=1 SV=1	PF00069//PF07714	Protein kinase domain//Protein tyrosine kinase	GO:0006468	protein phosphorylation	GO:0004672//GO:0005524	protein kinase activity//ATP binding	--	--	KOG0582	Ste20-like serine/threonine protein kinase	UP	2.3909	1.939e-11	blast,frame:2 start:65 end:1873	Category 1
Cluster-6671.22326	31	47	33	0	0	0	1.9	2.61	1.71	0	0	0	1298	3495334	XP_008225161.1	1123	4.6e-120	PREDICTED: protein DYAD-like [Prunus mume]	XM_008226939.1	XM_008226939	808	0	PREDICTED: Prunus mume protein DYAD-like (LOC103324827), mRNA	--	--	--	--	Q9FGN8	194	1.1e-13	Protein DYAD OS=Arabidopsis thaliana OX=3702 GN=DYAD PE=1 SV=2	PF17096//PF07966	Altered inheritance of mitochondria protein 3//A1 Propeptide	GO:0051016//GO:0006508	barbed-end actin filament capping//proteolysis	GO:0004190	aspartic-type endopeptidase activity	GO:0030479	actin cortical patch	--	--	UP	8.0193	2.3058e-09	blast,frame:2 start:2 end:1069	Category 1
Cluster-6671.22408	48	28	49	150	218	153	0.9	0.48	0.78	1.89	2.61	2.1	3568	6534555	XP_016648890.1	2608	8.1e-292	PREDICTED: U-box domain-containing protein 52 [Prunus mume]	XM_016793404.1	XM_016793404	1716	0	PREDICTED: Prunus mume U-box domain-containing protein 52 (LOC103327792), mRNA	--	--	--	--	Q8S8S7	956	1.4e-101	U-box domain-containing protein 34 OS=Arabidopsis thaliana OX=3702 GN=PUB34 PE=3 SV=1	PF02211//PF10186//PF07714//PF00582//PF00069//PF06090	Nitrile hydratase beta subunit//Vacuolar sorting 38 and autophagy-related subunit 14//Protein tyrosine kinase//Universal stress protein family//Protein kinase domain//Inositol-pentakisphosphate 2-kinase	GO:0042207//GO:0006950//GO:0018874//GO:0006468//GO:0006568//GO:0010508	styrene catabolic process//response to stress//benzoate metabolic process//protein phosphorylation//tryptophan metabolic process//positive regulation of autophagy	GO:0035299//GO:0005524//GO:0018822//GO:0004672	inositol pentakisphosphate 2-kinase activity//ATP binding//nitrile hydratase activity//protein kinase activity	--	--	--	--	DOWN	-1.6811	7.8775e-10	blast,frame:-3 start:2333 end:576	Category 1
Cluster-6671.22466	141	131	162	17	23	20.1	2.84	2.41	2.77	0.23	0.29	0.3	3354	--	--	--	--	--	XM_016793250.1	XM_016793250	2492	0	PREDICTED: Prunus mume probable LRR receptor-like serine/threonine-protein kinase At4g08850 (LOC103325645), transcript variant X2, mRNA	--	--	--	--	Q8VZG8	2438	1.8e-273	MDIS1-interacting receptor like kinase 2 OS=Arabidopsis thaliana OX=3702 GN=MIK2 PE=1 SV=3	PF00560//PF00069//PF07714//PF13855	Leucine Rich Repeat//Protein kinase domain//Protein tyrosine kinase//Leucine rich repeat	GO:0006468	protein phosphorylation	GO:0005524//GO:0004672//GO:0005515	ATP binding//protein kinase activity//protein binding	--	--	--	--	UP	3.2231	3.4488e-29	estscan,start:3354 end:307; minus strand	Category 1
Cluster-6671.22494	75	79	85	6	2	10	1.84	1.77	1.77	0.1	0.03	0.18	2802	3499401	XP_008230912.1	4111	0	PREDICTED: receptor-like protein kinase FERONIA [Prunus mume]	XM_008232690.2	XM_008232690	2427	0	PREDICTED: Prunus mume receptor-like protein kinase FERONIA (LOC103330133), mRNA	--	--	--	--	Q9SCZ4	1896	1.1e-210	Receptor-like protein kinase FERONIA OS=Arabidopsis thaliana OX=3702 GN=FER PE=1 SV=1	PF07714//PF00069	Protein tyrosine kinase//Protein kinase domain	GO:0006468	protein phosphorylation	GO:0004672//GO:0005524	protein kinase activity//ATP binding	--	--	--	--	UP	4.0864	2.8911e-18	blast,frame:2 start:2 end:2695	Category 1
Cluster-6671.275	147	127	142	104	77	61	2.1	1.66	1.73	1	0.7	0.64	4609	6956504	ANY30554.1	1677	9.5e-184	cytochrome oxidase subunit 1, partial ..mitochondrion.. [Vallisneria americana]	KR534606.1	KR534606	1382	0	Malus hupehensis var. mengshanensis mitochondrion, complete genome	K02256	COX1	cytochrome c oxidase subunit 1	http://www.genome.jp/dbget-bin/www_bget?ko:K02256	P26856	1651	4.5e-182	Cytochrome c oxidase subunit 1 OS=Marchantia polymorpha OX=3197 GN=COX1 PE=3 SV=2	PF00115//PF00335	Cytochrome C and Quinol oxidase polypeptide I//Tetraspanin family	GO:0006118//GO:0015992//GO:0006123//GO:0055114//GO:0009060	obsolete electron transport//proton transport//mitochondrial electron transport, cytochrome c to oxygen//oxidation-reduction process//aerobic respiration	GO:0009055//GO:0020037//GO:0004129//GO:0005506	electron carrier activity//heme binding//cytochrome-c oxidase activity//iron ion binding	GO:0045277//GO:0016021	respiratory chain complex IV//integral component of membrane	KOG4769	Cytochrome c oxidase, subunit I	UP	1.1547	4.733e-06	blast,frame:-1 start:3376 end:1601	Category 1
Cluster-6671.3073	70	64	69	33	33	42	7.28	5.93	5.98	2.22	2.1	3.09	887	3504581	XP_008238198.1	1229	1.6e-132	PREDICTED: serine..threonine-protein kinase CDL1-like [Prunus mume]	XM_008239976.1	XM_008239976	859	0	PREDICTED: Prunus mume serine/threonine-protein kinase CDL1-like (LOC103336855), mRNA	K04733	IRAK4	interleukin-1 receptor-associated kinase 4	http://www.genome.jp/dbget-bin/www_bget?ko:K04733	Q9LDZ5	342	5.3e-31	Probable serine/threonine-protein kinase PBL21 OS=Arabidopsis thaliana OX=3702 GN=PBL21 PE=1 SV=1	PF00069//PF07714//PF04103//PF03824//PF04923	Protein kinase domain//Protein tyrosine kinase//CD20-like family//High-affinity nickel-transport protein//Ninjurin	GO:0042246//GO:0007155//GO:0015675//GO:0006468//GO:0035444	tissue regeneration//cell adhesion//nickel cation transport//protein phosphorylation//nickel cation transmembrane transport	GO:0004672//GO:0005524//GO:0046872//GO:0015099	protein kinase activity//ATP binding//metal ion binding//nickel cation transmembrane transporter activity	GO:0016021	integral component of membrane	--	--	UP	1.2751	0.00016933	estscan,start:887 end:63; minus strand	Category 1
Cluster-6671.3239	30	23	25	2	4	9	3.19	2.18	2.22	0.14	0.26	0.68	873	--	--	--	--	--	FM253564.1	FM253564	145	1.25197e-67	Prunus cerasifera BAC insert containing Ma gene, ma1 susceptible allele, clone 40K9	--	--	--	--	--	--	--	--	PF05132//PF06459//PF02862//PF02932//PF01080//PF02724//PF11744	RNA polymerase III RPC4//Ryanodine Receptor TM 4-6//DDHD domain//Neurotransmitter-gated ion-channel transmembrane region//Presenilin//CDC45-like protein//Aluminium activated malate transporter	GO:0006811//GO:0006206//GO:0006874//GO:0006144//GO:0006270//GO:0006351//GO:0006383//GO:0015743//GO:0006816	ion transport//pyrimidine nucleobase metabolic process//cellular calcium ion homeostasis//purine nucleobase metabolic process//DNA replication initiation//transcription, DNA-templated//transcription from RNA polymerase III promoter//malate transport//calcium ion transport	GO:0004190//GO:0046872//GO:0005219//GO:0003677//GO:0003899	aspartic-type endopeptidase activity//metal ion binding//ryanodine-sensitive calcium-release channel activity//DNA binding//DNA-directed RNA polymerase activity	GO:0016020//GO:0005730//GO:0005622//GO:0005666//GO:0016021	membrane//nucleolus//intracellular//DNA-directed RNA polymerase III complex//integral component of membrane	--	--	UP	2.7423	6.6224e-05	estscan,start:75 end:873	Category 1
Cluster-6671.3479	60	44.07	72	15	26	15	4.6	3.03	4.63	0.75	1.24	0.82	1099	8275649	XP_020425735.1	669	1.7e-67	uncharacterized protein LOC109950606 [Prunus persica]	XR_001678574.1	XR_001678574	354	0	PREDICTED: Prunus mume uncharacterized LOC103343926 (LOC103343926), transcript variant X1, misc_RNA >ref|XM_016797203.1| PREDICTED: Prunus mume uncharacterized LOC103343926 (LOC103343926), transcript variant X2, mRNA	--	--	--	--	--	--	--	--	PF08328//PF00318	Adenylosuccinate lyase C-terminal//Ribosomal protein S2	GO:0006188//GO:0006531//GO:0009152//GO:0006522//GO:0006144//GO:0042254//GO:0006412	IMP biosynthetic process//aspartate metabolic process//purine ribonucleotide biosynthetic process//alanine metabolic process//purine nucleobase metabolic process//ribosome biogenesis//translation	GO:0003735//GO:0004018	structural constituent of ribosome//N6-(1,2-dicarboxyethyl)AMP AMP-lyase (fumarate-forming) activity	GO:0005622//GO:0005840	intracellular//ribosome	--	--	UP	2.0277	5.1099e-07	blast,frame:2 start:863 end:1099	Category 1
Cluster-6671.3571	1	0	0	13	11	9	0.12	0	0	0.97	0.78	0.74	825	8266931	XP_020417679.1	1003	2.4e-106	probable LRR receptor-like serine..threonine-protein kinase At3g47570 [Prunus persica]	XM_007220914.1	XM_007220914	404	0	Prunus persica hypothetical protein (PRUPE_ppa023635mg) mRNA, partial cds	--	--	--	--	Q1MX30	465	2.7e-45	Receptor kinase-like protein Xa21 OS=Oryza sativa subsp. indica OX=39946 GN=XA21 PE=1 SV=1	PF00069//PF07714	Protein kinase domain//Protein tyrosine kinase	GO:0006468	protein phosphorylation	GO:0004672//GO:0005524	protein kinase activity//ATP binding	--	--	--	--	DOWN	-4.5702	0.0073075	blast,frame:3 start:3 end:683	Category 1
Cluster-6671.3710	336	301	351	9	9	7	4.96	4.06	4.4	0.09	0.08	0.08	4475	10889800	PRQ53465.1	3375	0	putative RNA-directed DNA polymerase [Rosa chinensis]	AC253540.1	AC253540	3040	0	Prunus persica clone JGIBIXB-13K9, complete sequence	--	--	--	--	Q9ZT94	1592	3e-175	Retrovirus-related Pol polyprotein from transposon RE2 OS=Arabidopsis thaliana OX=3702 GN=RE2 PE=4 SV=1	PF01001//PF00665//PF13683	Hepatitis C virus non-structural protein NS4b//Integrase core domain//Integrase core domain	GO:0006144//GO:0006508//GO:0015074	purine nucleobase metabolic process//proteolysis//DNA integration	GO:0004197//GO:0003968//GO:0004252//GO:0017111	cysteine-type endopeptidase activity//RNA-directed RNA polymerase activity//serine-type endopeptidase activity//nucleoside-triphosphatase activity	GO:0031379	RNA-directed RNA polymerase complex	--	--	UP	5.676	4.5651e-65	estscan,start:4475 end:1; minus strand	Category 1
Cluster-6671.3968	379	407	439	129	112	138	8.01	7.86	7.88	1.82	1.5	2.13	3212	7856763	ONI07347.1	3619	0	hypothetical protein PRUPE_5G114700 [Prunus persica]	XM_008240850.2	XM_008240850	2615	0	PREDICTED: Prunus mume mitogen-activated protein kinase kinase kinase 7-like (LOC103337680), mRNA	--	--	--	--	P25848	402	2.1e-37	Light-sensor Protein kinase OS=Ceratodon purpureus OX=3225 GN=PHY1 PE=3 SV=3	PF04706//PF00069//PF06293//PF07714	Dickkopf N-terminal cysteine-rich region//Protein kinase domain//Lipopolysaccharide kinase (Kdo/WaaP) family//Protein tyrosine kinase	GO:0006468//GO:0007275//GO:0030178	protein phosphorylation//multicellular organismal development//negative regulation of Wnt signaling pathway	GO:0016773//GO:0005524//GO:0004672	phosphotransferase activity, alcohol group as acceptor//ATP binding//protein kinase activity	GO:0016020//GO:0005576	membrane//extracellular region	--	--	UP	2.053	1.8331e-39	blast,frame:3 start:660 end:2900	Category 1
Cluster-6671.3971	11	14	8	42	41.04	29	0.9	1.03	0.55	2.24	2.08	1.69	1048	8256219	XP_020411556.1	994	3.4e-105	uncharacterized protein LOC109946862 [Prunus persica]	XM_016793445.1	XM_016793445	473	0	PREDICTED: Prunus mume uncharacterized LOC107880907 (LOC107880907), mRNA	--	--	--	--	--	--	--	--	PF00202//PF08328//PF04111//PF10186	Aminotransferase class-III//Adenylosuccinate lyase C-terminal//Autophagy protein Apg6//Vacuolar sorting 38 and autophagy-related subunit 14	GO:0006522//GO:0009152//GO:0006144//GO:0006914//GO:0006188//GO:0006531//GO:0010508	alanine metabolic process//purine ribonucleotide biosynthetic process//purine nucleobase metabolic process//autophagy//IMP biosynthetic process//aspartate metabolic process//positive regulation of autophagy	GO:0030170//GO:0008483//GO:0004018	pyridoxal phosphate binding//transaminase activity//N6-(1,2-dicarboxyethyl)AMP AMP-lyase (fumarate-forming) activity	--	--	--	--	DOWN	-1.3834	0.014976	estscan,start:1048 end:123; minus strand	Category 1
Cluster-6671.4661	245	281	284	148	172	146	4.79	5.02	4.71	1.93	2.14	2.08	3451	3490985	XP_008219158.1	4703	0	PREDICTED: receptor-like protein kinase HSL1 [Prunus mume]	XM_008220936.2	XM_008220936	3332	0	PREDICTED: Prunus mume receptor-like protein kinase HSL1 (LOC103319402), mRNA	--	--	--	--	Q9FGL5	3132	0	Receptor protein-tyrosine kinase CEPR1 OS=Arabidopsis thaliana OX=3702 GN=CEPR1 PE=1 SV=1	PF07714//PF13855//PF00560//PF00069	Protein tyrosine kinase//Leucine rich repeat//Leucine Rich Repeat//Protein kinase domain	GO:0006468	protein phosphorylation	GO:0005515//GO:0005524//GO:0004672	protein binding//ATP binding//protein kinase activity	--	--	--	--	UP	1.1658	3.2257e-13	blast,frame:-1 start:3277 end:317	Category 1
Cluster-6671.4739	0	4	2	25	29	28	0	0.21	0.1	0.97	1.06	1.18	1345	3489367	XP_008237299.1	2032	1.9e-225	PREDICTED: UDP-glycosyltransferase 74F2-like isoform X2 [Prunus mume]	XM_016794593.1	XM_016794593	1265	0	PREDICTED: Prunus mume UDP-glycosyltransferase 74F2-like (LOC103336036), transcript variant X1, mRNA	K13691	SGT1	pathogen-inducible salicylic acid glucosyltransferase	http://www.genome.jp/dbget-bin/www_bget?ko:K13691	O22822	1097	2.3e-118	UDP-glycosyltransferase 74F2 OS=Arabidopsis thaliana OX=3702 GN=UGT74F2 PE=1 SV=1	PF04101//PF00201//PF02347	Glycosyltransferase family 28 C-terminal domain//UDP-glucoronosyl and UDP-glucosyl transferase//Glycine cleavage system P-protein	GO:0006546//GO:0006544//GO:0008152//GO:0006566//GO:0006563//GO:0055114	glycine catabolic process//glycine metabolic process//metabolic process//threonine metabolic process//L-serine metabolic process//oxidation-reduction process	GO:0004375//GO:0016758	glycine dehydrogenase (decarboxylating) activity//transferase activity, transferring hexosyl groups	--	--	--	--	DOWN	-3.4175	0.00012332	estscan,start:1 end:1345	Category 1
Cluster-6671.5018	104.63	114	107	43	58.01	42.51	6.3	6.2	5.43	1.7	2.18	1.84	1318	7852693	ONI03277.1	1748	1.6e-192	hypothetical protein PRUPE_6G248400 [Prunus persica]	XM_008243403.2	XM_008243403	1252	0	PREDICTED: Prunus mume probable LRR receptor-like serine/threonine-protein kinase At3g47570 (LOC103340036), mRNA	--	--	--	--	Q9SD62	970	1.2e-103	Putative receptor-like protein kinase At3g47110 OS=Arabidopsis thaliana OX=3702 GN=At3g47110 PE=3 SV=1	PF00560//PF13855//PF00069//PF07714	Leucine Rich Repeat//Leucine rich repeat//Protein kinase domain//Protein tyrosine kinase	GO:0006468	protein phosphorylation	GO:0005515//GO:0005524//GO:0004672	protein binding//ATP binding//protein kinase activity	--	--	--	--	UP	1.5538	4.3024e-09	blast,frame:3 start:3 end:1316	Category 1
Cluster-6671.544	16	25	34	1	2	0	1.83	2.54	3.24	0.07	0.14	0	833	--	--	--	--	--	XR_001678155.1	XR_001678155	79	5.82878e-31	PREDICTED: Prunus mume uncharacterized LOC107881489 (LOC107881489), transcript variant X2, ncRNA	--	--	--	--	--	--	--	--	PF10399	Ubiquitinol-cytochrome C reductase Fe-S subunit TAT signal	GO:0006119//GO:0006118//GO:0055114//GO:0015992	oxidative phosphorylation//obsolete electron transport//oxidation-reduction process//proton transport	GO:0008121	ubiquinol-cytochrome-c reductase activity	--	--	--	--	UP	5.0026	3.5209e-06	estscan,start:1 end:180	Category 1
Cluster-6671.5877	40	38	48	16	27	26	5.03	4.24	5.02	1.29	2.07	2.3	783	--	--	--	--	--	XM_007201434.1	XM_007201434	697	0	Prunus persica hypothetical protein (PRUPE_ppa014797mg) mRNA, complete cds	--	--	--	--	Q40392	476	1.4e-46	TMV resistance protein N OS=Nicotiana glutinosa OX=35889 GN=N PE=1 SV=1	PF09036//PF01637//PF00004//PF00931	Bcr-Abl oncoprotein oligomerisation domain//Archaeal ATPase//ATPase family associated with various cellular activities (AAA)//NB-ARC domain	GO:0009069//GO:0007165//GO:0016310//GO:0006468	serine family amino acid metabolic process//signal transduction//phosphorylation//protein phosphorylation	GO:0004674//GO:0005524//GO:0043531//GO:0005096	protein serine/threonine kinase activity//ATP binding//ADP binding//GTPase activator activity	--	--	--	--	UP	1.2347	0.0054246	estscan,start:1 end:783	Category 1
Cluster-6671.5990	1094	1124.19	1286.39	81	87	63	25.04	23.47	24.98	1.24	1.26	1.05	2990	--	--	--	--	--	XM_016792639.1	XM_016792639	1255	0	PREDICTED: Prunus mume probable LRR receptor-like serine/threonine-protein kinase At1g07650 (LOC103324924), mRNA	--	--	--	--	C0LGG9	1212	2.4e-131	Probable LRR receptor-like serine/threonine-protein kinase At1g53440 OS=Arabidopsis thaliana OX=3702 GN=At1g53440 PE=2 SV=2	PF07714//PF00069	Protein tyrosine kinase//Protein kinase domain	GO:0006468	protein phosphorylation	GO:0005524//GO:0004672	ATP binding//protein kinase activity	--	--	--	--	UP	4.2918	5.296e-226	blast,frame:1 start:844 end:2022|blast,frame:3 start:2421 end:2723|blast,frame:2 start:557 end:793	Category 1
Cluster-6671.6748	3	11.01	9	18	35	39	0.19	0.63	0.48	0.76	1.4	1.79	1259	567175	CAN82003.1	265	1.4e-20	hypothetical protein VITISV_023198 [Vitis vinifera]	XM_008239807.1	XM_008239807	134	2.37874e-61	PREDICTED: Prunus mume serine/threonine-protein kinase At5g01020 (LOC103336706), mRNA	--	--	--	--	Q9SY91	219	1.4e-16	Probable serine/threonine-protein kinase PBL15 OS=Arabidopsis thaliana OX=3702 GN=PBL15 PE=1 SV=1	PF00069//PF07714	Protein kinase domain//Protein tyrosine kinase	GO:0006468	protein phosphorylation	GO:0005524//GO:0004672	ATP binding//protein kinase activity	--	--	--	--	DOWN	-1.652	0.017761	blast,frame:-2 start:406 end:203	Category 1
Cluster-6671.688	44	34	40	19	18	16	1.46	1.03	1.12	0.42	0.38	0.38	2155	3303959	AHY20334.1	1357	5.7e-147	cytochrome c oxidase subunit 3 ..mitochondrion.. ..mitochondrion.. [Brassica juncea var. tumida]	KR534606.1	KR534606	1930	0	Malus hupehensis var. mengshanensis mitochondrion, complete genome	K02262	COX3	cytochrome c oxidase subunit 3	http://www.genome.jp/dbget-bin/www_bget?ko:K02262	P92514	1328	6e-145	Cytochrome c oxidase subunit 3 OS=Arabidopsis thaliana OX=3702 GN=COX3 PE=2 SV=2	PF00510//PF12179//PF01127//PF06449	Cytochrome c oxidase subunit III//I-kappa-kinase-beta NEMO binding domain//Succinate dehydrogenase/Fumarate reductase transmembrane subunit//Mitochondrial domain of unknown function (DUF1082)	GO:0009069//GO:0016310	serine family amino acid metabolic process//phosphorylation	GO:0008384//GO:0016627//GO:0016820//GO:0015002	IkappaB kinase activity//oxidoreductase activity, acting on the CH-CH group of donors//hydrolase activity, acting on acid anhydrides, catalyzing transmembrane movement of substances//heme-copper terminal oxidase activity	GO:0005739//GO:0008385//GO:0016021//GO:0016020	mitochondrion//IkappaB kinase complex//integral component of membrane//membrane	KOG4664	Cytochrome oxidase subunit III and related proteins	UP	1.5289	0.00082492	blast,frame:3 start:825 end:896	Category 1
Cluster-6671.747	342	371	346.97	80	91	79	18.69	18.33	15.98	2.88	3.11	3.11	1423	3506441	XP_008240794.1	1527	7.3e-167	PREDICTED: mitogen-activated protein kinase kinase kinase 1-like isoform X1 [Prunus mume]	XM_008242572.2	XM_008242572	1032	0	PREDICTED: Prunus mume mitogen-activated protein kinase kinase kinase 1-like (LOC103339304), transcript variant X1, mRNA	K13414	MEKK1P	mitogen-activated protein kinase kinase kinase 1, plant	http://www.genome.jp/dbget-bin/www_bget?ko:K13414	Q39008	768	3.4e-80	Mitogen-activated protein kinase kinase kinase 1 OS=Arabidopsis thaliana OX=3702 GN=MEKK1 PE=1 SV=2	PF07714//PF06293//PF00069	Protein tyrosine kinase//Lipopolysaccharide kinase (Kdo/WaaP) family//Protein kinase domain	GO:0006468	protein phosphorylation	GO:0005524//GO:0016773//GO:0004672	ATP binding//phosphotransferase activity, alcohol group as acceptor//protein kinase activity	GO:0016020	membrane	--	--	UP	2.4558	1.2573e-48	blast,frame:1 start:64 end:1032	Category 1
Cluster-6671.7646	0	1	0	19	13	20	0	0.05	0	0.71	0.46	0.82	1374	10463291	POF18471.1	751	6.7e-77	hypothetical protein CFP56_63015 [Quercus suber]	FO906004.1	FO906004	252	6.59945e-127	Leptosphaeria maculans lepidii ibcn84_scaffold00020 complete sequence	--	--	--	--	--	--	--	--	PF07464//PF01442//PF07730//PF01291	Apolipophorin-III precursor (apoLp-III)//Apolipoprotein A1/A4/E domain//Histidine kinase//LIF / OSM family	GO:0000160//GO:0042157//GO:0016310//GO:0006955//GO:0006869//GO:0007165	phosphorelay signal transduction system//lipoprotein metabolic process//phosphorylation//immune response//lipid transport//signal transduction	GO:0046983//GO:0000155//GO:0005125//GO:0008289	protein dimerization activity//phosphorelay sensor kinase activity//cytokine activity//lipid binding	GO:0016021//GO:0005576//GO:0009365	integral component of membrane//extracellular region//protein histidine kinase complex	--	--	DOWN	-5.2422	0.00071034	blast,frame:-1 start:1374 end:64	Category 1
Cluster-6671.772	44	39	71	2	0	0	3.48	2.77	4.7	0.1	0	0	1075	3569288	XP_008383133.1	1268	5.9e-137	PREDICTED: cysteine-rich receptor-like protein kinase 10 [Malus domestica]	XM_008384911.2	XM_008384911	526	0	PREDICTED: Malus x domestica cysteine-rich receptor-like protein kinase 10 (LOC103445859), mRNA	K04730	IRAK1	interleukin-1 receptor-associated kinase 1	http://www.genome.jp/dbget-bin/www_bget?ko:K04730	Q9LW83	863	2.5e-91	G-type lectin S-receptor-like serine/threonine-protein kinase CES101 OS=Arabidopsis thaliana OX=3702 GN=CES101 PE=2 SV=2	PF07714//PF00069//PF11883	Protein tyrosine kinase//Protein kinase domain//Domain of unknown function (DUF3403)	GO:0016310//GO:0006468//GO:0009069	phosphorylation//protein phosphorylation//serine family amino acid metabolic process	GO:0005524//GO:0004672//GO:0004674	ATP binding//protein kinase activity//protein serine/threonine kinase activity	--	--	--	--	UP	6.6215	1.4536e-08	blast,frame:2 start:2 end:892	Category 1
Cluster-6671.794	539	578	562.01	1	0	2	6.6	6.48	5.86	0.01	0	0.02	5330	--	--	--	--	--	XM_016791583.1	XM_016791583	1045	0	PREDICTED: Prunus mume uncharacterized LOC107880309 (LOC107880309), mRNA	--	--	--	--	--	--	--	--	PF07808//PF09181//PF01985//PF02902//PF05162	RED-like protein N-terminal region//Prolyl-tRNA synthetase, C-terminal//CRS1 / YhbY (CRM) domain//Ulp1 protease family, C-terminal catalytic domain//Ribosomal protein L41	GO:0006525//GO:0006412//GO:0006433//GO:0006508//GO:0042254//GO:0006560	arginine metabolic process//translation//prolyl-tRNA aminoacylation//proteolysis//ribosome biogenesis//proline metabolic process	GO:0008234//GO:0000166//GO:0003735//GO:0004827//GO:0005524//GO:0003723	cysteine-type peptidase activity//nucleotide binding//structural constituent of ribosome//proline-tRNA ligase activity//ATP binding//RNA binding	GO:0005840//GO:0005737//GO:0005634	ribosome//cytoplasm//nucleus	--	--	UP	9.4986	6.8708e-28	blast,frame:-3 start:3498 end:154|blast,frame:-1 start:4142 end:3960|blast,frame:-2 start:4984 end:4148	Category 1
Cluster-6671.8047	292.43	307.98	329.67	32.11	38.96	33.73	8.27	7.93	7.9	0.6	0.7	0.69	2476	3489886	XP_008244109.1	1984	1.3e-219	PREDICTED: probable LRR receptor-like serine..threonine-protein kinase At3g47570 [Prunus mume]	XM_008245887.1	XM_008245887	1228	0	PREDICTED: Prunus mume probable LRR receptor-like serine/threonine-protein kinase At3g47570 (LOC103342273), mRNA	--	--	--	--	C0LGP4	861	9.8e-91	Probable LRR receptor-like serine/threonine-protein kinase At3g47570 OS=Arabidopsis thaliana OX=3702 GN=At3g47570 PE=2 SV=1	PF00069//PF07714//PF05445	Protein kinase domain//Protein tyrosine kinase//Poxvirus serine/threonine protein kinase	GO:0006468	protein phosphorylation	GO:0005524//GO:0004672	ATP binding//protein kinase activity	--	--	--	--	UP	3.5154	4.3861e-65	blast,frame:1 start:34 end:1320	Category 1
Cluster-6671.8056	104	99	110	12	27	23	1.69	1.47	1.52	0.13	0.28	0.27	4091	6534327	XP_016648666.1	2179	5.2e-242	PREDICTED: putative receptor-like protein kinase At3g47110 isoform X2 [Prunus mume]	XM_016793180.1	XM_016793180	1341	0	PREDICTED: Prunus mume probable LRR receptor-like serine/threonine-protein kinase At3g47570 (LOC103324916), transcript variant X2, mRNA	K13420	FLS2	LRR receptor-like serine/threonine-protein kinase FLS2	http://www.genome.jp/dbget-bin/www_bget?ko:K13420	Q9SD62	615	5.4e-62	Putative receptor-like protein kinase At3g47110 OS=Arabidopsis thaliana OX=3702 GN=At3g47110 PE=3 SV=1	PF00560//PF00069//PF13855//PF07714	Leucine Rich Repeat//Protein kinase domain//Leucine rich repeat//Protein tyrosine kinase	GO:0006468	protein phosphorylation	GO:0005515//GO:0005524//GO:0004672	protein binding//ATP binding//protein kinase activity	--	--	--	--	UP	2.7087	5.9811e-17	blast,frame:-2 start:2305 end:860|blast,frame:-3 start:4059 end:3238	Category 1
Cluster-6671.8191	5	13	6	82	72	71	0.12	0.29	0.12	1.34	1.12	1.27	2812	3500874	XP_008233107.1	3068	0	PREDICTED: probable serine..threonine-protein kinase WNK4 [Prunus mume]	XM_008234885.2	XM_008234885	1571	0	PREDICTED: Prunus mume probable serine/threonine-protein kinase WNK4 (LOC103332175), mRNA	K08867	WNK, PRKWNK	WNK lysine deficient protein kinase	http://www.genome.jp/dbget-bin/www_bget?ko:K08867	Q6EU49	1393	2.3e-152	Probable serine/threonine-protein kinase WNK4 OS=Oryza sativa subsp. japonica OX=39947 GN=WNK4 PE=2 SV=1	PF05499//PF07714//PF00069	DNA methyltransferase 1-associated protein 1 (DMAP1)//Protein tyrosine kinase//Protein kinase domain	GO:0006468//GO:0045892	protein phosphorylation//negative regulation of transcription, DNA-templated	GO:0004672//GO:0005524	protein kinase activity//ATP binding	GO:0005634	nucleus	--	--	DOWN	-2.8661	8.8956e-10	estscan,start:559 end:2604	Category 1
Cluster-6671.8847	68.05	77.21	100.69	50.73	62.74	41.67	2.83	2.92	3.54	1.4	1.65	1.26	1775	6152927	XP_015872018.1	297	3.8e-24	PREDICTED: casein kinase II subunit beta'-like, partial [Ziziphus jujuba]	XM_008231266.2	XM_008231266	217	2.45284e-107	PREDICTED: Prunus mume casein kinase II subunit beta-like (LOC103328862), transcript variant X4, mRNA	K03115	CSNK2B	casein kinase II subunit beta	http://www.genome.jp/dbget-bin/www_bget?ko:K03115	P40229	291	8.7e-25	Casein kinase II subunit beta-2 OS=Arabidopsis thaliana OX=3702 GN=CKB2 PE=1 SV=1	PF01214	Casein kinase II regulatory subunit	GO:0045859	regulation of protein kinase activity	GO:0019887	protein kinase regulator activity	GO:0005956	protein kinase CK2 complex	KOG3092	Casein kinase II, beta subunit	UP	1.0232	0.00075348	blast,frame:1 start:1 end:231	Category 1
Cluster-6671.9040	0	0	0	26	26	33	0	0	0	1.65	1.57	2.29	924	--	--	--	--	--	--	--	--	--	--	--	--	--	--	--	--	--	--	PF12124	Coronavirus polyprotein cleavage domain	GO:0006508	proteolysis	GO:0008242//GO:0016817//GO:0016788//GO:0004197//GO:0016740	omega peptidase activity//hydrolase activity, acting on acid anhydrides//hydrolase activity, acting on ester bonds//cysteine-type endopeptidase activity//transferase activity	--	--	--	--	DOWN	-6.9075	1.0121e-06	estscan,start:1 end:128	Category 1
Cluster-6671.923	9	12	4	0	0	0	2	2.31	0.73	0	0	0	566	9076030	XP_021809138.1	309	5e-26	cytochrome P450 CYP749A22-like [Prunus avium]	XM_007201465.1	XM_007201465	190	7.66271e-93	Prunus persica hypothetical protein (PRUPE_ppa016887mg) mRNA, complete cds	K15639	CYP734A1, BAS1	PHYB activation tagged suppressor 1	http://www.genome.jp/dbget-bin/www_bget?ko:K15639	H2DH17	184	7.1e-13	Cytochrome P450 CYP749A22 OS=Panax ginseng OX=4054 PE=2 SV=1	PF10461	Peptidase S68	GO:0006915//GO:0006974	apoptotic process//cellular response to DNA damage stimulus	--	--	--	--	--	--	UP	5.889	0.00053854	blast,frame:-2 start:364 end:29|blast,frame:-1 start:389 end:222	Category 1
Cluster-6891.0	23	42	21	4	11	3	1.53	2.52	1.17	0.17	0.46	0.14	1222	3493018	XP_008221867.1	1721	2e-189	PREDICTED: serine..threonine-protein kinase STY8-like [Prunus mume]	XM_008223645.1	XM_008223645	979	0	PREDICTED: Prunus mume serine/threonine-protein kinase STY8-like (LOC103321807), mRNA	--	--	--	--	Q9ZQ31	582	1.1e-58	Serine/threonine-protein kinase STY13 OS=Arabidopsis thaliana OX=3702 GN=STY13 PE=1 SV=2	PF07714//PF00069//PF06293	Protein tyrosine kinase//Protein kinase domain//Lipopolysaccharide kinase (Kdo/WaaP) family	GO:0006468	protein phosphorylation	GO:0005524//GO:0016773//GO:0004672	ATP binding//phosphotransferase activity, alcohol group as acceptor//protein kinase activity	GO:0016020	membrane	--	--	UP	2.6499	6.8839e-05	blast,frame:2 start:2 end:1045	Category 1
Cluster-6965.0	0	0	0	4	6	5	0	0	0	0.46	0.65	0.63	630	6785258	XP_008382760.2	387	5e-35	PREDICTED: LOW QUALITY PROTEIN: uncharacterized protein LOC103445517 [Malus domestica]	--	--	--	--	--	--	--	--	--	--	--	--	--	PF01166//PF06156//PF03234	TSC-22/dip/bun family//Protein of unknown function (DUF972)//Cdc37 N terminal kinase binding	GO:0006260//GO:0006355	DNA replication//regulation of transcription, DNA-templated	GO:0003700//GO:0019901	transcription factor activity, sequence-specific DNA binding//protein kinase binding	GO:0005667	transcription factor complex	--	--	DOWN	-4.3915	0.043834	estscan,start:1 end:630	Category 1
Cluster-703.0	73	75	91	1	7	1	1.33	1.25	1.41	0.01	0.08	0.01	3672	6531826	XP_008246467.2	4340	0	PREDICTED: LOW QUALITY PROTEIN: uncharacterized protein LOC103318578 [Prunus mume]	XM_008248245.2	XM_008248245	2700	0	PREDICTED: Prunus mume uncharacterized LOC103318578 (LOC103318578), mRNA	--	--	--	--	Q9SD62	1302	1.1e-141	Putative receptor-like protein kinase At3g47110 OS=Arabidopsis thaliana OX=3702 GN=At3g47110 PE=3 SV=1	PF13855//PF00069//PF00560//PF07714//PF04226	Leucine rich repeat//Protein kinase domain//Leucine Rich Repeat//Protein tyrosine kinase//Transglycosylase associated protein	GO:0006468	protein phosphorylation	GO:0005515//GO:0005524//GO:0004672	protein binding//ATP binding//protein kinase activity	GO:0016021	integral component of membrane	--	--	UP	5.1063	5.9774e-18	blast,frame:-1 start:627 end:211|blast,frame:-3 start:3448 end:665	Category 1
Cluster-716.0	24	29	39	0	1	3	4.4	4.64	5.87	0	0.11	0.38	627	7883045	ONI33629.1	474	4e-45	hypothetical protein PRUPE_1G436800 [Prunus persica]	XM_007223710.1	XM_007223710	552	0	Prunus persica hypothetical protein (PRUPE_ppa013918mg) mRNA, complete cds	--	--	--	--	Q8RZB5	127	3.2e-06	Probable calcium-binding protein CML10 OS=Oryza sativa subsp. japonica OX=39947 GN=CML10 PE=2 SV=1	PF13499//PF10591//PF13202//PF10204//PF00036//PF13833//PF13405	EF-hand domain pair//Secreted protein acidic and rich in cysteine Ca binding region//EF hand//Dual oxidase maturation factor//EF hand//EF-hand domain pair//EF-hand domain	GO:0015031//GO:0007165	protein transport//signal transduction	GO:0005509	calcium ion binding	GO:0005578//GO:0016021//GO:0005789	proteinaceous extracellular matrix//integral component of membrane//endoplasmic reticulum membrane	--	--	UP	4.873	1.5275e-07	blast,frame:-3 start:595 end:299	Category 1
Cluster-7519.0	0	0	0	10	9	3	0	0	0	1.31	1.11	0.43	584	--	--	--	--	--	--	--	--	--	--	--	--	--	--	--	--	--	--	PF01080//PF15681	Presenilin//Lymphocyte activation family X	GO:0051249//GO:0006955	regulation of lymphocyte activation//immune response	GO:0004190	aspartic-type endopeptidase activity	GO:0016021	integral component of membrane	--	--	DOWN	-4.9298	0.010472	estscan,start:584 end:1; minus strand	Category 1
Cluster-7716.0	1	0	0	40	20	25	0.08	0	0	2.04	0.97	1.39	1086	10423296	POE78475.1	884	2e-92	rhamnolipids biosynthesis 3-oxoacyl-[acyl-carrier-protein] reductase [Quercus suber]	--	--	--	--	--	--	--	--	--	Q9WYG0	288	1.2e-24	Uncharacterized oxidoreductase TM_0325 OS=Thermotoga maritima (strain ATCC 43589 / MSB8 / DSM 3109 / JCM 10099) OX=243274 GN=TM_0325 PE=3 SV=1	PF02558//PF00106//PF00107//PF02737//PF00070	Ketopantoate reductase PanE/ApbA//short chain dehydrogenase//Zinc-binding dehydrogenase//3-hydroxyacyl-CoA dehydrogenase, NAD binding domain//Pyridine nucleotide-disulphide oxidoreductase	GO:0006550//GO:0055114//GO:0018874//GO:0006574//GO:0015940//GO:0006554//GO:0008152//GO:0006631//GO:0006552//GO:0006633//GO:0006568	isoleucine catabolic process//oxidation-reduction process//benzoate metabolic process//valine catabolic process//pantothenate biosynthetic process//lysine catabolic process//metabolic process//fatty acid metabolic process//leucine catabolic process//fatty acid biosynthetic process//tryptophan metabolic process	GO:0003857//GO:0008677//GO:0016491	3-hydroxyacyl-CoA dehydrogenase activity//2-dehydropantoate 2-reductase activity//oxidoreductase activity	--	--	KOG0725	Reductases with broad range of substrate specificities	DOWN	-5.9469	3.9417e-05	blast,frame:-3 start:1084 end:137	Category 1
Cluster-7947.0	36	25	25	114	109	106	0.73	0.46	0.43	1.54	1.4	1.56	3353	8271936	XP_020422333.1	3921	0	receptor protein kinase CLAVATA1 [Prunus persica]	XM_008234878.1	XM_008234878	2504	0	PREDICTED: Prunus mume receptor protein kinase CLAVATA1-like (LOC103332169), mRNA	K00924	E2.7.1.-	--	http://www.genome.jp/dbget-bin/www_bget?ko:K00924	Q9SYQ8	2427	3.4e-272	Receptor protein kinase CLAVATA1 OS=Arabidopsis thaliana OX=3702 GN=CLV1 PE=1 SV=3	PF13855//PF07714//PF00560//PF00069	Leucine rich repeat//Protein tyrosine kinase//Leucine Rich Repeat//Protein kinase domain	GO:0006468	protein phosphorylation	GO:0005515//GO:0004672//GO:0005524	protein binding//protein kinase activity//ATP binding	--	--	--	--	DOWN	-1.5605	1.0586e-06	blast,frame:-3 start:3276 end:616	Category 1
Cluster-8112.0	1	9	5	33	24	25	0.04	0.32	0.17	0.86	0.6	0.71	1861	6535533	XP_008233516.2	2869	0	PREDICTED: cyclic nucleotide-gated ion channel 1-like [Prunus mume]	XM_008235294.2	XM_008235294	1819	0	PREDICTED: Prunus mume cyclic nucleotide-gated ion channel 1-like (LOC103332552), mRNA	--	--	--	--	Q9LMP1	461	1.8e-44	Wall-associated receptor kinase 2 OS=Arabidopsis thaliana OX=3702 GN=WAK2 PE=1 SV=1	PF05529//PF00069//PF07714//PF07127//PF00520	B-cell receptor-associated protein 31-like//Protein kinase domain//Protein tyrosine kinase//Late nodulin protein//Ion transport protein	GO:0006886//GO:0009878//GO:0006468//GO:0055085//GO:0006811	intracellular protein transport//nodule morphogenesis//protein phosphorylation//transmembrane transport//ion transport	GO:0004672//GO:0005216//GO:0046872//GO:0005524	protein kinase activity//ion channel activity//metal ion binding//ATP binding	GO:0005783//GO:0016020//GO:0016021	endoplasmic reticulum//membrane//integral component of membrane	--	--	DOWN	-2.1029	0.0054534	estscan,start:1692 end:40; minus strand	Category 1
Cluster-8281.0	0	1	0	18	22	19	0	0.05	0	0.62	0.71	0.71	1485	7870249	ONI20833.1	412	1.5e-37	hypothetical protein PRUPE_2G036000 [Prunus persica]	--	--	--	--	--	--	--	--	--	F4JL28	378	6e-35	Chromatin remodeling protein EBS OS=Arabidopsis thaliana OX=3702 GN=EBS PE=1 SV=1	PF07851//PF06315//PF09036//PF08702//PF00060	TMPIT-like protein//Isocitrate dehydrogenase kinase/phosphatase (AceK)//Bcr-Abl oncoprotein oligomerisation domain//Fibrinogen alpha/beta chain family//Ligand-gated ion channel	GO:0007165//GO:0006468//GO:0006811//GO:0009069//GO:0051258//GO:0030168//GO:0007268//GO:0016310//GO:0006006	signal transduction//protein phosphorylation//ion transport//serine family amino acid metabolic process//protein polymerization//platelet activation//synaptic transmission//phosphorylation//glucose metabolic process	GO:0030674//GO:0005102//GO:0004674//GO:0004970//GO:0005096//GO:0008772//GO:0016791	protein binding, bridging//receptor binding//protein serine/threonine kinase activity//ionotropic glutamate receptor activity//GTPase activator activity//[isocitrate dehydrogenase (NADP+)] kinase activity//phosphatase activity	GO:0016020//GO:0005577//GO:0005737//GO:0016021	membrane//fibrinogen complex//cytoplasm//integral component of membrane	--	--	DOWN	-5.4076	0.0003387	blast,frame:1 start:562 end:795	Category 1
Cluster-839.0	27	36	30	0	1	0	1.07	1.29	1	0	0.02	0	1857	7866265	ONI16849.1	2565	4.1e-287	hypothetical protein PRUPE_3G125200 [Prunus persica]	XM_008230909.1	XM_008230909	1756	0	PREDICTED: Prunus mume uncharacterized LOC103328510 (LOC103328510), mRNA	--	--	--	--	Q8L636	1463	1.1e-160	Sodium/calcium exchanger NCL OS=Arabidopsis thaliana OX=3702 GN=NCL PE=2 SV=1	PF13833//PF13499//PF10591//PF13202//PF00036//PF13405//PF05434//PF01699//PF04114	EF-hand domain pair//EF-hand domain pair//Secreted protein acidic and rich in cysteine Ca binding region//EF hand//EF hand//EF-hand domain//TMEM9//Sodium/calcium exchanger protein//Gaa1-like, GPI transamidase component	GO:0055085//GO:0007165	transmembrane transport//signal transduction	GO:0005509	calcium ion binding	GO:0005578//GO:0016021//GO:0042765	proteinaceous extracellular matrix//integral component of membrane//GPI-anchor transamidase complex	--	--	UP	6.8012	7.5034e-07	blast,frame:2 start:2 end:1807	Category 1
Cluster-8492.0	0	0	0	4	9	8	0	0	0	0.57	1.21	1.25	558	--	--	--	--	--	XM_007224784.1	XM_007224784	354	0	Prunus persica hypothetical protein (PRUPE_ppa023081mg) mRNA, complete cds	--	--	--	--	--	--	--	--	PF00452	Apoptosis regulator proteins, Bcl-2 family	GO:0042981	regulation of apoptotic process	--	--	--	--	--	--	DOWN	-4.8771	0.011514	blast,frame:-2 start:548 end:3	Category 1
Cluster-85.0	2	1	8	0	0	0	0.76	0.32	2.43	0	0	0	446	9073258	XP_021806056.1	419	6.8e-39	eukaryotic peptide chain release factor subunit 1-3-like [Prunus avium]	XM_008385624.2	XM_008385624	212	3.49651e-105	PREDICTED: Malus x domestica eukaryotic peptide chain release factor subunit 1-3-like (LOC103446487), mRNA	K03265	ETF1, ERF1	peptide chain release factor subunit 1	http://www.genome.jp/dbget-bin/www_bget?ko:K03265	D2K760	360	2.2e-33	Eukaryotic peptide chain release factor subunit 1-3 OS=Brassica oleracea var. botrytis OX=3715 GN=ERF1-3 PE=2 SV=1	PF02382	RTX N-terminal domain	GO:0009405	pathogenesis	GO:0005509	calcium ion binding	GO:0005576	extracellular region	KOG0688	Peptide chain release factor 1 (eRF1)	UP	4.6358	0.048854	blast,frame:-2 start:346 end:233|blast,frame:-1 start:281 end:3	Category 1
Cluster-8602.0	1	1	1	15	11	7	0.2	0.17	0.16	1.87	1.3	0.96	599	10652684	XP_023886042.1	742	3.2e-76	superoxide dismutase [Cu-Zn] [Quercus suber]	XM_014223164.1	XM_014223164	330	1.21604e-170	Bipolaris maydis ATCC 48331 hypothetical protein mRNA	K04565	SOD1	superoxide dismutase, Cu-Zn family	http://www.genome.jp/dbget-bin/www_bget?ko:K04565	P85978	700	1.1e-72	Superoxide dismutase [Cu-Zn] OS=Aspergillus niger OX=5061 GN=sodC PE=1 SV=2	PF00080	Copper/zinc superoxide dismutase (SODC)	GO:0006801//GO:0055114	superoxide metabolic process//oxidation-reduction process	GO:0046872	metal ion binding	--	--	KOG0441	Cu2+/Zn2+ superoxide dismutase SOD1	DOWN	-3.0867	0.028561	blast,frame:1 start:1 end:528	Category 1
Cluster-8852.0	142	155	177	30	49	49	3.66	3.64	3.86	0.51	0.8	0.92	2690	9076646	XP_021809826.1	2188	3.1e-243	protein kinase DC2 isoform X3 [Prunus avium]	XM_007210412.1	XM_007210412	1167	0	Prunus persica hypothetical protein (PRUPE_ppa025116mg) mRNA, complete cds	--	--	--	--	Q05609	789	2.4e-82	Serine/threonine-protein kinase CTR1 OS=Arabidopsis thaliana OX=3702 GN=CTR1 PE=1 SV=1	PF07714//PF00069//PF00989//PF08447	Protein tyrosine kinase//Protein kinase domain//PAS fold//PAS fold	GO:0006468//GO:0006355	protein phosphorylation//regulation of transcription, DNA-templated	GO:0005524//GO:0004672//GO:0005515	ATP binding//protein kinase activity//protein binding	--	--	--	--	UP	2.2528	8.7511e-20	blast,frame:3 start:1689 end:2507|blast,frame:2 start:23 end:1462	Category 1
Cluster-9048.0	3	0	0	30	33	21	0.19	0	0	1.25	1.31	0.96	1266	--	--	--	--	--	XM_016792674.1	XM_016792674	1013	0	PREDICTED: Prunus mume senescence-specific cysteine protease SAG39-like (LOC107880649), mRNA	K16292	CEP, CYSEP	KDEL-tailed cysteine endopeptidase	http://www.genome.jp/dbget-bin/www_bget?ko:K16292	A2XQE8	1008	4.5e-108	Senescence-specific cysteine protease SAG39 OS=Oryza sativa subsp. indica OX=39946 GN=OsI_14861 PE=3 SV=1	PF03051//PF00112	Peptidase C1-like family//Papain family cysteine protease	GO:0006508	proteolysis	GO:0008234//GO:0004197	cysteine-type peptidase activity//cysteine-type endopeptidase activity	--	--	--	--	DOWN	-4.4114	6.7824e-05	blast,frame:3 start:57 end:1091	Category 1
Cluster-9061.0	20	9	21	158	161	131	0.26	0.11	0.23	1.37	1.33	1.24	5072	9084669	XP_021818749.1	6922	0	myosin-12 [Prunus avium]	XM_007220792.1	XM_007220792	3088	0	Prunus persica hypothetical protein (PRUPE_ppa020929mg) mRNA, complete cds	K10357	MYO5	myosin V	http://www.genome.jp/dbget-bin/www_bget?ko:K10357	F4IRU3	5349	0	Myosin-12 OS=Arabidopsis thaliana OX=3702 GN=XI-F PE=2 SV=1	PF04136//PF01166//PF00612//PF04508//PF10473//PF07475//PF00063	Sec34-like family//TSC-22/dip/bun family//IQ calmodulin-binding motif//Viral A-type inclusion protein repeat//Leucine-rich repeats of kinetochore protein Cenp-F/LEK1//HPr Serine kinase C-terminal domain//Myosin head (motor domain)	GO:0000160//GO:0016310//GO:0016032//GO:0006886//GO:0006109//GO:0006355	phosphorelay signal transduction system//phosphorylation//viral process//intracellular protein transport//regulation of carbohydrate metabolic process//regulation of transcription, DNA-templated	GO:0005515//GO:0003700//GO:0000155//GO:0005524//GO:0045502//GO:0003774//GO:0004672//GO:0008134//GO:0042803	protein binding//transcription factor activity, sequence-specific DNA binding//phosphorelay sensor kinase activity//ATP binding//dynein binding//motor activity//protein kinase activity//transcription factor binding//protein homodimerization activity	GO:0016459//GO:0005667//GO:0009365//GO:0016020//GO:0005801//GO:0030286	myosin complex//transcription factor complex//protein histidine kinase complex//membrane//cis-Golgi network//dynein complex	--	--	DOWN	-2.7996	8.8853e-18	estscan,start:5072 end:121; minus strand	Category 1
Cluster-9201.0	1	3	2	52	47	36	0.03	0.09	0.06	1.18	1.01	0.89	2104	3501211	XP_008233560.1	1599	4.8e-175	PREDICTED: putative wall-associated receptor kinase-like 16 [Prunus mume]	XM_008235293.1	XM_008235293	1398	0	PREDICTED: Prunus mume cyclic nucleotide-gated ion channel 1-like (LOC103332551), mRNA	--	--	--	--	O65717	507	9.3e-50	Cyclic nucleotide-gated ion channel 1 OS=Arabidopsis thaliana OX=3702 GN=CNGC1 PE=1 SV=1	PF00069//PF00520//PF07714	Protein kinase domain//Ion transport protein//Protein tyrosine kinase	GO:0055085//GO:0006811//GO:0006468	transmembrane transport//ion transport//protein phosphorylation	GO:0005524//GO:0004672//GO:0005216	ATP binding//protein kinase activity//ion channel activity	GO:0016020	membrane	--	--	DOWN	-4.1256	1.265e-07	estscan,start:2045 end:124; minus strand	Category 1
Cluster-9532.0	0	0	0	24	13	15	0	0	0	1.19	0.61	0.81	1110	10669748	XP_023890652.1	982	8.9e-104	serine..threonine-protein kinase srk1-like [Quercus suber]	FO905848.1	FO905848	273	1.12279e-138	Leptosphaeria biglobosa Thlaspii ibcn65_scaffold00053 complete sequence	K13412	CPK	calcium-dependent protein kinase	http://www.genome.jp/dbget-bin/www_bget?ko:K13412	O94547	643	8.3e-66	Serine/threonine-protein kinase srk1 OS=Schizosaccharomyces pombe (strain 972 / ATCC 24843) OX=284812 GN=srk1 PE=1 SV=1	PF00069//PF07714	Protein kinase domain//Protein tyrosine kinase	GO:0006468	protein phosphorylation	GO:0004672//GO:0005524	protein kinase activity//ATP binding	--	--	KOG0032	Ca2+/calmodulin-dependent protein kinase, EF-Hand protein superfamily	DOWN	-6.1978	5.0148e-05	blast,frame:1 start:1 end:996	Category 1
Cluster-9555.0	7	12	11	1	3	2	0.44	0.67	0.58	0.04	0.12	0.09	1284	--	--	--	--	--	XM_016793632.1	XM_016793632	1245	0	PREDICTED: Prunus mume putative leucine-rich repeat receptor-like protein kinase At2g19210 (LOC103329200), transcript variant X1, mRNA	--	--	--	--	C0LGL4	1161	8.3e-126	Probable LRR receptor-like serine/threonine-protein kinase At2g28960 OS=Arabidopsis thaliana OX=3702 GN=At2g28960 PE=2 SV=1	PF13855//PF07714//PF00560//PF00069	Leucine rich repeat//Protein tyrosine kinase//Leucine Rich Repeat//Protein kinase domain	GO:0006468	protein phosphorylation	GO:0005524//GO:0004672//GO:0005515	ATP binding//protein kinase activity//protein binding	--	--	--	--	UP	2.6878	0.018098	blast,frame:1 start:1 end:1284	Category 1
Cluster-9922.0	15	10	7	34	39.22	31	0.85	0.51	0.33	1.26	1.39	1.26	1387	8265072	XP_020416001.1	1130	7.7e-121	non-functional pseudokinase ZED1 [Prunus persica]	XM_016793718.1	XM_016793718	1005	0	PREDICTED: Prunus mume non-functional pseudokinase ZED1-like (LOC107880974), mRNA	--	--	--	--	Q8LGB6	304	2.1e-26	Non-functional pseudokinase ZED1 OS=Arabidopsis thaliana OX=3702 GN=ZED1 PE=1 SV=1	PF00069//PF07714	Protein kinase domain//Protein tyrosine kinase	GO:0006468	protein phosphorylation	GO:0004672//GO:0005524	protein kinase activity//ATP binding	--	--	--	--	DOWN	-1.3115	0.028829	blast,frame:-1 start:937 end:857|blast,frame:-2 start:642 end:307	Category 1
Cluster-9975.0	167	147	204	80	139	86	5.32	4.26	5.51	1.7	2.8	1.99	2230	9072081	XP_021804751.1	3165	0	G-type lectin S-receptor-like serine..threonine-protein kinase At4g27290 isoform X2 [Prunus avium]	XM_016793154.1	XM_016793154	1839	0	PREDICTED: Prunus mume G-type lectin S-receptor-like serine/threonine-protein kinase At4g27290 (LOC103326351), transcript variant X3, mRNA	--	--	--	--	O81832	1517	7.6e-167	G-type lectin S-receptor-like serine/threonine-protein kinase At4g27290 OS=Arabidopsis thaliana OX=3702 GN=At4g27290 PE=3 SV=4	PF12398//PF02480//PF15182//PF00954//PF00069//PF07714	Receptor serine/threonine kinase//Alphaherpesvirus glycoprotein E//Otospiralin//S-locus glycoprotein domain//Protein kinase domain//Protein tyrosine kinase	GO:0007605//GO:0016310//GO:0048544//GO:0006468//GO:0009069	sensory perception of sound//phosphorylation//recognition of pollen//protein phosphorylation//serine family amino acid metabolic process	GO:0005524//GO:0004674//GO:0004672	ATP binding//protein serine/threonine kinase activity//protein kinase activity	GO:0016020	membrane	--	--	UP	1.1404	8.2084e-07	estscan,start:222 end:2230	Category 1
Cluster-10058.0	9	19	15	254	231	278	0.57	1.08	0.79	10.5	9.07	12.55	1275	3495407	XP_008225270.1	1651	2.7e-181	PREDICTED: zingipain-2-like [Prunus mume]	XM_008226997.2	XM_008226997	1024	0	PREDICTED: Prunus mume ervatamin-C-like (LOC103324881), mRNA	--	--	--	--	Q7XWK5	863	3e-91	Senescence-specific cysteine protease SAG39 OS=Oryza sativa subsp. japonica OX=39947 GN=SAG39 PE=2 SV=2	PF03051//PF00112	Peptidase C1-like family//Papain family cysteine protease	GO:0006508	proteolysis	GO:0008234//GO:0004197	cysteine-type peptidase activity//cysteine-type endopeptidase activity	--	--	--	--	DOWN	-3.7947	8.7329e-36	blast,frame:-2 start:1250 end:204	Category 2
Cluster-2650.0	31	20	27.99	82.06	114	89	1.46	0.85	1.11	2.56	3.37	3.03	1604	6537486	XP_016651569.1	724	1.1e-73	PREDICTED: putative mediator of RNA polymerase II transcription subunit 26 [Prunus mume]	XM_016796083.1	XM_016796083	650	0	PREDICTED: Prunus mume putative mediator of RNA polymerase II transcription subunit 26 (LOC107881712), mRNA	--	--	--	--	--	--	--	--	PF04560//PF02285//PF02888//PF01239	RNA polymerase Rpb2, domain 7//Cytochrome oxidase c subunit VIII//Calmodulin binding domain//Protein prenyltransferase alpha subunit repeat	GO:0006123//GO:0018342//GO:0015992//GO:0006144//GO:0006351//GO:0006813//GO:0006206	mitochondrial electron transport, cytochrome c to oxygen//protein prenylation//proton transport//purine nucleobase metabolic process//transcription, DNA-templated//potassium ion transport//pyrimidine nucleobase metabolic process	GO:0003677//GO:0015269//GO:0003899//GO:0008318//GO:0005516//GO:0004129	DNA binding//calcium-activated potassium channel activity//DNA-directed RNA polymerase activity//protein prenyltransferase activity//calmodulin binding//cytochrome-c oxidase activity	GO:0016021//GO:0045277//GO:0005730	integral component of membrane//respiratory chain complex IV//nucleolus	--	--	DOWN	-1.4736	1.6645e-05	blast,frame:1 start:1375 end:1602	Category 2
Cluster-2686.0	14	14	16.93	87	94	79	0.88	0.79	0.89	3.59	3.68	3.56	1277	9086688	XP_021821002.1	421	1.2e-38	L-type lectin-domain containing receptor kinase IX.1-like [Prunus avium]	XM_008238446.2	XM_008238446	378	0	PREDICTED: Prunus mume L-type lectin-domain containing receptor kinase IX.1-like (LOC103335441), mRNA	--	--	--	--	Q9LXA5	311	3e-27	L-type lectin-domain containing receptor kinase IX.1 OS=Arabidopsis thaliana OX=3702 GN=LECRK91 PE=1 SV=1	PF07213//PF07714//PF00069//PF02460	DAP10 membrane protein//Protein tyrosine kinase//Protein kinase domain//Patched family	GO:0006468//GO:0014068//GO:0050776//GO:0007165	protein phosphorylation//positive regulation of phosphatidylinositol 3-kinase signaling//regulation of immune response//signal transduction	GO:0005524//GO:0043548//GO:0008158//GO:0005102//GO:0004672	ATP binding//phosphatidylinositol 3-kinase binding//hedgehog receptor activity//receptor binding//protein kinase activity	GO:0016020	membrane	--	--	DOWN	-2.1632	6.2788e-09	blast,frame:2 start:2 end:403|blast,frame:3 start:552 end:827|blast,frame:1 start:361 end:594	Category 2
Cluster-2940.0	1	1	0	66	61	42	0.07	0.06	0	3.04	2.66	2.11	1173	--	--	--	--	--	FO905645.1	FO905645	241	7.30695e-121	Leptosphaeria biglobosa brassicae b35_scaffold00019 complete sequence	--	--	--	--	P42327	402	7.8e-38	Alcohol dehydrogenase OS=Geobacillus stearothermophilus OX=1422 GN=adh PE=1 SV=1	PF02737//PF01408//PF08240//PF00107//PF02826	3-hydroxyacyl-CoA dehydrogenase, NAD binding domain//Oxidoreductase family, NAD-binding Rossmann fold//Alcohol dehydrogenase GroES-like domain//Zinc-binding dehydrogenase//D-isomer specific 2-hydroxyacid dehydrogenase, NAD binding domain	GO:0006574//GO:0006554//GO:0006631//GO:0018874//GO:0006550//GO:0055114//GO:0006568//GO:0006633//GO:0006552	valine catabolic process//lysine catabolic process//fatty acid metabolic process//benzoate metabolic process//isoleucine catabolic process//oxidation-reduction process//tryptophan metabolic process//fatty acid biosynthetic process//leucine catabolic process	GO:0003857//GO:0016491//GO:0051287	3-hydroxyacyl-CoA dehydrogenase activity//oxidoreductase activity//NAD binding	--	--	KOG0023	Alcohol dehydrogenase, class V	DOWN	-6.0253	3.4495e-07	blast,frame:-3 start:1171 end:107	Category 2
Cluster-3662.0	10	9	12	97	116	97	0.38	0.31	0.39	2.47	2.8	2.69	1904	7874820	ONI25404.1	1965	1.6e-217	hypothetical protein PRUPE_2G301100 [Prunus persica]	XM_016794332.1	XM_016794332	1493	0	PREDICTED: Prunus mume probable serine/threonine-protein kinase At1g01540 (LOC103333788), mRNA	--	--	--	--	Q3EDL4	936	1.5e-99	Probable serine/threonine-protein kinase At1g01540 OS=Arabidopsis thaliana OX=3702 GN=At1g01540 PE=1 SV=2	PF07714//PF00069	Protein tyrosine kinase//Protein kinase domain	GO:0006468	protein phosphorylation	GO:0005524//GO:0004672	ATP binding//protein kinase activity	--	--	--	--	DOWN	-2.9536	2.8114e-14	blast,frame:3 start:177 end:1571	Category 2
Cluster-3705.0	0	1	1	642	704	599	0	0.03	0.02	11.81	12.31	12.02	2529	3495671	XP_008225624.1	3762	0	PREDICTED: wall-associated receptor kinase 1-like [Prunus mume]	XM_008227402.2	XM_008227402	2382	0	PREDICTED: Prunus mume wall-associated receptor kinase 1-like (LOC103325248), mRNA	--	--	--	--	Q9LMP1	1155	8.1e-125	Wall-associated receptor kinase 2 OS=Arabidopsis thaliana OX=3702 GN=WAK2 PE=1 SV=1	PF00069//PF00008//PF07714//PF13947//PF07645	Protein kinase domain//EGF-like domain//Protein tyrosine kinase//Wall-associated receptor kinase galacturonan-binding//Calcium-binding EGF domain	GO:0006468	protein phosphorylation	GO:0030247//GO:0005515//GO:0004672//GO:0005509//GO:0005524	polysaccharide binding//protein binding//protein kinase activity//calcium ion binding//ATP binding	--	--	--	--	DOWN	-9.5582	3.8826e-19	blast,frame:2 start:2 end:2401	Category 2
Cluster-4288.0	10.38	17	14	38	48	30	1.6	2.3	1.78	3.72	4.45	3.22	692	3509484	XP_008245071.1	793	4.6e-82	PREDICTED: LEAF RUST 10 DISEASE-RESISTANCE LOCUS RECEPTOR-LIKE PROTEIN KINASE-like 2.5 [Prunus mume]	XM_008246849.2	XM_008246849	544	0	PREDICTED: Prunus mume LEAF RUST 10 DISEASE-RESISTANCE LOCUS RECEPTOR-LIKE PROTEIN KINASE-like 2.5 (LOC103343176), mRNA	--	--	--	--	F4KA51	375	6.2e-35	LEAF RUST 10 DISEASE-RESISTANCE LOCUS RECEPTOR-LIKE PROTEIN KINASE-like 2.3 OS=Arabidopsis thaliana OX=3702 GN=LRK10L-2.3 PE=3 SV=2	PF00069//PF07714	Protein kinase domain//Protein tyrosine kinase	GO:0006468	protein phosphorylation	GO:0005524//GO:0004672	ATP binding//protein kinase activity	--	--	--	--	DOWN	-1.1281	0.040765	blast,frame:1 start:1 end:462	Category 2
Cluster-4319.0	4	4	10	105	84	67	0.21	0.19	0.44	3.64	2.77	2.54	1468	8256402	XP_020413334.1	1115	4.5e-119	G-type lectin S-receptor-like serine..threonine-protein kinase At1g67520 [Prunus persica]	XM_016793688.1	XM_016793688	651	0	PREDICTED: Prunus mume G-type lectin S-receptor-like serine/threonine-protein kinase At1g11330 (LOC103329349), mRNA >ref|XM_008232605.2| PREDICTED: Prunus mume G-type lectin S-receptor-like serine/threonine-protein kinase At1g11330 (LOC103330062), mRNA	--	--	--	--	O81906	684	1.9e-70	G-type lectin S-receptor-like serine/threonine-protein kinase B120 OS=Arabidopsis thaliana OX=3702 GN=B120 PE=2 SV=1	PF00069//PF07714//PF11883	Protein kinase domain//Protein tyrosine kinase//Domain of unknown function (DUF3403)	GO:0009069//GO:0016310//GO:0006468	serine family amino acid metabolic process//phosphorylation//protein phosphorylation	GO:0004674//GO:0004672//GO:0005524	protein serine/threonine kinase activity//protein kinase activity//ATP binding	--	--	--	--	DOWN	-3.472	1.9674e-12	blast,frame:-3 start:707 end:486	Category 2
Cluster-4585.0	1	2	0	51	45	30	0.1	0.17	0	3.16	2.64	2.03	941	8276231	XP_007200170.2	943	2.5e-99	protein DMR6-LIKE OXYGENASE 2 [Prunus persica]	XM_008239614.2	XM_008239614	684	0	PREDICTED: Prunus mume protein DMR6-LIKE OXYGENASE 1-like (LOC103336559), mRNA	--	--	--	--	Q9FFF6	259	2.4e-21	Probable 2-oxoglutarate-dependent dioxygenase At5g05600 OS=Arabidopsis thaliana OX=3702 GN=At5g05600 PE=2 SV=1	PF02285//PF03171	Cytochrome oxidase c subunit VIII//2OG-Fe(II) oxygenase superfamily	GO:0055114//GO:0015992//GO:0006123	oxidation-reduction process//proton transport//mitochondrial electron transport, cytochrome c to oxygen	GO:0004129//GO:0016491	cytochrome-c oxidase activity//oxidoreductase activity	GO:0045277	respiratory chain complex IV	--	--	DOWN	-5.0154	1.1024e-06	blast,frame:3 start:3 end:542	Category 2
Cluster-5251.0	27	23	37	83	84	65	1.95	1.5	2.25	3.93	3.78	3.36	1147	9077876	XP_021811195.1	1107	2.9e-118	cyclin-U1-1 [Prunus avium]	XM_008231878.2	XM_008231878	971	0	PREDICTED: Prunus mume cyclin-U1-1 (LOC103329410), mRNA	--	--	--	--	Q9LJ45	586	3.5e-59	Cyclin-U1-1 OS=Arabidopsis thaliana OX=3702 GN=CYCU1-1 PE=1 SV=1	PF08613	Cyclin	GO:0000079	regulation of cyclin-dependent protein serine/threonine kinase activity	GO:0019901	protein kinase binding	--	--	KOG1674	Cyclin	DOWN	-1.0494	0.0041776	estscan,start:1147 end:203; minus strand	Category 2
Cluster-5339.0	208	245	223.92	120	157	150.98	10.05	10.72	9.13	3.83	4.76	5.26	1571	6532710	XP_008223155.2	2188	1.8e-243	PREDICTED: aspartic proteinase CDR1-like [Prunus mume]	XM_008224933.2	XM_008224933	1272	0	PREDICTED: Prunus mume aspartic proteinase CDR1-like (LOC103322976), mRNA	--	--	--	--	Q6XBF8	608	1.3e-61	Aspartic proteinase CDR1 OS=Arabidopsis thaliana OX=3702 GN=CDR1 PE=1 SV=1	PF00026	Eukaryotic aspartyl protease	GO:0006508	proteolysis	GO:0004190	aspartic-type endopeptidase activity	--	--	--	--	UP	1.0296	2.5435e-08	blast,frame:-1 start:1517 end:192	Category 2
Cluster-5748.0	7	6	7	64	73	59	0.44	0.34	0.37	2.63	2.85	2.65	1281	9102160	XP_021803215.1	1635	2e-179	mitogen-activated protein kinase kinase kinase 17-like [Prunus avium]	XM_007213110.1	XM_007213110	857	0	Prunus persica hypothetical protein (PRUPE_ppa026317mg) mRNA, partial cds	--	--	--	--	O80888	400	1.4e-37	Mitogen-activated protein kinase kinase kinase 17 OS=Arabidopsis thaliana OX=3702 GN=MAPKKK17 PE=1 SV=1	PF00069//PF07714	Protein kinase domain//Protein tyrosine kinase	GO:0006468	protein phosphorylation	GO:0005524//GO:0004672	ATP binding//protein kinase activity	--	--	--	--	DOWN	-2.9215	2.6937e-09	blast,frame:-1 start:1281 end:205	Category 2
Cluster-5778.0	11	9	7	55	35	31	1.84	1.32	0.96	5.82	3.5	3.6	660	3989554	XP_009355919.1	345	3.9e-30	PREDICTED: probable calcium-binding protein CML16 [Pyrus x bretschneideri]	XM_008244914.2	XM_008244914	211	1.91077e-104	PREDICTED: Prunus mume probable calcium-binding protein CML16 (LOC103341400), mRNA	K13448	CML	calcium-binding protein CML	http://www.genome.jp/dbget-bin/www_bget?ko:K13448	Q9LI84	301	2.2e-26	Probable calcium-binding protein CML16 OS=Arabidopsis thaliana OX=3702 GN=CML16 PE=2 SV=2	PF13499//PF13202//PF13833//PF00036//PF13405	EF-hand domain pair//EF hand//EF-hand domain pair//EF hand//EF-hand domain	--	--	GO:0005509	calcium ion binding	--	--	KOG0027	Calmodulin and related proteins (EF-Hand superfamily)	DOWN	-1.7886	0.0018741	blast,frame:-2 start:488 end:183	Category 2
Cluster-5814.0	3	6	1	158	190	137	0.1	0.18	0.03	3.52	4.02	3.33	2136	--	--	--	--	--	XM_016792587.1	XM_016792587	499	0	PREDICTED: Prunus mume probable leucine-rich repeat receptor-like protein kinase At1g35710 (LOC103319934), transcript variant X2, mRNA	--	--	--	--	Q9LP24	207	5.8e-15	Probable leucine-rich repeat receptor-like protein kinase At1g35710 OS=Arabidopsis thaliana OX=3702 GN=At1g35710 PE=2 SV=1	PF07714//PF00069//PF08653	Protein tyrosine kinase//Protein kinase domain//DASH complex subunit Dam1	GO:0008608//GO:0006468	attachment of spindle microtubules to kinetochore//protein phosphorylation	GO:0004672//GO:0005524	protein kinase activity//ATP binding	GO:0042729//GO:0072686	DASH complex//mitotic spindle	--	--	DOWN	-5.2243	8.2178e-23	blast,frame:-3 start:1345 end:1256	Category 2
Cluster-6526.0	5	9	6	30	37	22	0.66	1.06	0.66	2.55	2.97	2.05	758	3509883	XP_008245794.1	390	2.7e-35	PREDICTED: uncharacterized protein LOC103343943 [Prunus mume]	XR_001677884.1	XR_001677884	443	0	PREDICTED: Prunus mume uncharacterized LOC107881220 (LOC107881220), transcript variant X2, misc_RNA	--	--	--	--	--	--	--	--	PF05132//PF06213//PF04931//PF03896//PF01080//PF04147//PF04546//PF05470//PF02724//PF02535//PF17050	RNA polymerase III RPC4//Cobalamin biosynthesis protein CobT//DNA polymerase phi//Translocon-associated protein (TRAP), alpha subunit//Presenilin//Nop14-like family//Sigma-70, non-essential region//Eukaryotic translation initiation factor 3 subunit 8 N-terminus//CDC45-like protein//ZIP Zinc transporter//Altered inheritance of mitochondria 5	GO:0030001//GO:0042407//GO:0006352//GO:0006413//GO:0006446//GO:0006144//GO:0006206//GO:0009236//GO:0006355//GO:0006260//GO:0055085//GO:0006351//GO:0006270//GO:0006383	metal ion transport//cristae formation//DNA-templated transcription, initiation//translational initiation//regulation of translational initiation//purine nucleobase metabolic process//pyrimidine nucleobase metabolic process//cobalamin biosynthetic process//regulation of transcription, DNA-templated//DNA replication//transmembrane transport//transcription, DNA-templated//DNA replication initiation…	GO:0004190//GO:0003700//GO:0046873//GO:0003677//GO:0031369//GO:0016987//GO:0003887//GO:0003743//GO:0003899	aspartic-type endopeptidase activity//transcription factor activity, sequence-specific DNA binding//metal ion transmembrane transporter activity//DNA binding//translation initiation factor binding//sigma factor activity//DNA-directed DNA polymerase activity//translation initiation factor activity//DNA-directed RNA polymerase activity	GO:0005852//GO:0005730//GO:0005840//GO:0044284//GO:0061617//GO:0016021//GO:0005666//GO:0005789//GO:0032040//GO:0042575//GO:0016020//GO:0005667	eukaryotic translation initiation factor 3 complex//nucleolus//ribosome//mitochondrial crista junction//MICOS complex//integral component of membrane//DNA-directed RNA polymerase III complex//endoplasmic reticulum membrane//small-subunit processome//DNA polymerase complex//membrane//transcription factor complex	--	--	DOWN	-1.7773	0.0074288	blast,frame:-1 start:758 end:54	Category 2
Cluster-6671.1030	84	71	84	548	613	565	1.35	1.05	1.15	5.91	6.29	6.65	4121	7855289	ONI05873.1	5714	0	hypothetical protein PRUPE_5G027500 [Prunus persica]	XM_008239942.1	XM_008239942	3912	0	PREDICTED: Prunus mume cellulose synthase-like protein D3 (LOC103336830), mRNA	--	--	--	--	Q9M9M4	4433	0	Cellulose synthase-like protein D3 OS=Arabidopsis thaliana OX=3702 GN=CSLD3 PE=1 SV=1	PF12131//PF01721//PF03552	Protein of unknown function (DUF3586)//Class II bacteriocin//Cellulose synthase	GO:0006011//GO:0030244//GO:0005985//GO:0006508//GO:0005982//GO:0042742	UDP-glucose metabolic process//cellulose biosynthetic process//sucrose metabolic process//proteolysis//starch metabolic process//defense response to bacterium	GO:0004197//GO:0016760	cysteine-type endopeptidase activity//cellulose synthase (UDP-forming) activity	GO:0016020//GO:0005576	membrane//extracellular region	--	--	DOWN	-2.4837	1.3596e-55	blast,frame:-2 start:3709 end:302	Category 2
Cluster-6671.11250	1249.1	1275.06	1560.53	866.01	970.52	793.01	20.06	18.72	21.3	9.31	9.93	9.3	4135	3489634	XP_008240486.1	3085	0	PREDICTED: L-type lectin-domain containing receptor kinase IV.1-like [Prunus mume]	XM_008242264.2	XM_008242264	2364	0	PREDICTED: Prunus mume L-type lectin-domain containing receptor kinase IV.1-like (LOC103338983), mRNA	--	--	--	--	O80939	1868	2.8e-207	L-type lectin-domain containing receptor kinase IV.1 OS=Arabidopsis thaliana OX=3702 GN=LECRK41 PE=2 SV=1	PF00139//PF00069//PF00514//PF07714	Legume lectin domain//Protein kinase domain//Armadillo/beta-catenin-like repeat//Protein tyrosine kinase	GO:0006468	protein phosphorylation	GO:0005524//GO:0004672//GO:0030246//GO:0005515	ATP binding//protein kinase activity//carbohydrate binding//protein binding	--	--	--	--	UP	1.002	2.493e-29	blast,frame:-1 start:3043 end:968	Category 2
Cluster-6671.11873	362	304	370	867	991.71	969	7.7	5.9	6.68	12.31	13.4	15.02	3195	9090739	XP_021804374.1	4173	0	probably inactive leucine-rich repeat receptor-like protein kinase IMK2, partial [Prunus avium]	XM_008235600.2	XM_008235600	2905	0	PREDICTED: Prunus mume probably inactive leucine-rich repeat receptor-like protein kinase IMK2 (LOC103332840), mRNA	--	--	--	--	C0LGP9	2394	2.2e-268	Probable leucine-rich repeat receptor-like protein kinase IMK3 OS=Arabidopsis thaliana OX=3702 GN=IMK3 PE=1 SV=1	PF13855//PF00560//PF07714//PF00069	Leucine rich repeat//Leucine Rich Repeat//Protein tyrosine kinase//Protein kinase domain	GO:0006468	protein phosphorylation	GO:0005524//GO:0004672//GO:0005515	ATP binding//protein kinase activity//protein binding	--	--	--	--	DOWN	-1.0804	1.8946e-18	blast,frame:1 start:127 end:2916	Category 2
Cluster-6671.1247	47	49	61	282	306	301	1.55	1.47	1.7	6.17	6.37	7.19	2168	7868037	ONI18621.1	3066	0	hypothetical protein PRUPE_3G227500 [Prunus persica]	XM_007214872.1	XM_007214872	2045	0	Prunus persica hypothetical protein (PRUPE_ppa001369mg) mRNA, complete cds	--	--	--	--	O64477	1965	8.3e-219	G-type lectin S-receptor-like serine/threonine-protein kinase At2g19130 OS=Arabidopsis thaliana OX=3702 GN=At2g19130 PE=2 SV=1	PF00069//PF07714//PF00954	Protein kinase domain//Protein tyrosine kinase//S-locus glycoprotein domain	GO:0006468//GO:0048544	protein phosphorylation//recognition of pollen	GO:0004672//GO:0005524	protein kinase activity//ATP binding	--	--	--	--	DOWN	-2.1394	3.3764e-26	blast,frame:3 start:3 end:2024	Category 2
Cluster-6671.12856	54	56	34	600	495	506	2.56	2.4	1.36	18.78	14.72	17.3	1597	6531478	XP_008245897.2	462	2.5e-43	PREDICTED: uncharacterized protein LOC103344046, partial [Prunus mume]	XM_008247688.1	XM_008247688	421	0	PREDICTED: Prunus mume uncharacterized LOC103344060 (LOC103344060), partial mRNA	--	--	--	--	--	--	--	--	PF06373	Cocaine and amphetamine regulated transcript protein (CART)	GO:0001678//GO:0000186//GO:0007186//GO:0008343//GO:0009267//GO:0032099	cellular glucose homeostasis//activation of MAPKK activity//G-protein coupled receptor signaling pathway//adult feeding behavior//cellular response to starvation//negative regulation of appetite	--	--	GO:0005615	extracellular space	--	--	DOWN	-3.1036	1.23e-52	blast,frame:1 start:1123 end:1596	Category 2
Cluster-6671.12918	16	19.73	18.06	97	101.25	81.96	0.98	1.09	0.93	3.9	3.87	3.6	1303	9096866	XP_021832254.1	1691	6.4e-186	probable mannitol dehydrogenase [Prunus avium]	XM_008238238.1	XM_008238238	1262	0	PREDICTED: Prunus mume probable mannitol dehydrogenase (LOC103335223), mRNA	K00083	E1.1.1.195	cinnamyl-alcohol dehydrogenase	http://www.genome.jp/dbget-bin/www_bget?ko:K00083	Q9ZRF1	1414	3.9e-155	Probable mannitol dehydrogenase OS=Fragaria ananassa OX=3747 GN=CAD PE=2 SV=1	PF02737//PF00107//PF02826//PF08240//PF00106//PF13241	3-hydroxyacyl-CoA dehydrogenase, NAD binding domain//Zinc-binding dehydrogenase//D-isomer specific 2-hydroxyacid dehydrogenase, NAD binding domain//Alcohol dehydrogenase GroES-like domain//short chain dehydrogenase//Putative NAD(P)-binding	GO:0006568//GO:0018874//GO:0019354//GO:0006554//GO:0006631//GO:0006633//GO:0006552//GO:0006779//GO:0055114//GO:0006550//GO:0006574//GO:0008152	tryptophan metabolic process//benzoate metabolic process//siroheme biosynthetic process//lysine catabolic process//fatty acid metabolic process//fatty acid biosynthetic process//leucine catabolic process//porphyrin-containing compound biosynthetic process//oxidation-reduction process//isoleucine catabolic process//valine catabolic process//metabolic process	GO:0043115//GO:0051287//GO:0016491//GO:0003857	precorrin-2 dehydrogenase activity//NAD binding//oxidoreductase activity//3-hydroxyacyl-CoA dehydrogenase activity	--	--	--	--	DOWN	-2.0052	1.2007e-08	estscan,start:1247 end:165; minus strand	Category 2
Cluster-6671.13744	59	83	55	201	245.15	171	1.5	1.92	1.18	3.4	3.94	3.16	2726	7880372	ONI30956.1	613	1.3e-60	hypothetical protein PRUPE_1G284100 [Prunus persica]	XM_016791400.1	XM_016791400	799	0	PREDICTED: Prunus mume probable methyltransferase PMT5 (LOC103321494), mRNA	--	--	--	--	Q3EC77	396	9e-37	Probable methyltransferase PMT5 OS=Arabidopsis thaliana OX=3702 GN=At2g03480 PE=2 SV=2	PF15108	Voltage-dependent calcium channel gamma-like subunit protein family	GO:0006816//GO:0006811	calcium ion transport//ion transport	GO:0005262//GO:0005244	calcium channel activity//voltage-gated ion channel activity	GO:0016021	integral component of membrane	KOG0477	DNA replication licensing factor, MCM2 component	DOWN	-1.269	8.3264e-08	estscan,start:445 end:55; minus strand	Category 2
Cluster-6671.13973	27	27	28.94	135	143	144	0.78	0.71	0.71	2.61	2.63	3.04	2419	9089389	XP_021824014.1	2734	1.4e-306	LEAF RUST 10 DISEASE-RESISTANCE LOCUS RECEPTOR-LIKE PROTEIN KINASE-like 2.5 [Prunus avium]	XM_008247490.2	XM_008247490	1067	0	PREDICTED: Prunus mume rust resistance kinase Lr10-like (LOC103343850), mRNA	--	--	--	--	P93604	957	7.1e-102	Rust resistance kinase Lr10 OS=Triticum aestivum OX=4565 GN=LRK10 PE=2 SV=1	PF13947//PF07714//PF00069	Wall-associated receptor kinase galacturonan-binding//Protein tyrosine kinase//Protein kinase domain	GO:0006468	protein phosphorylation	GO:0004672//GO:0005524//GO:0030247	protein kinase activity//ATP binding//polysaccharide binding	--	--	--	--	DOWN	-1.9812	2.788e-12	blast,frame:-2 start:2370 end:178	Category 2
Cluster-6671.14092	11	11	6	1404	1223	1032	0.73	0.66	0.34	61.39	50.77	49.31	1220	3510046	XP_008246073.1	1257	1.3e-135	PREDICTED: annexin D4-like, partial [Prunus mume]	XM_008247851.2	XM_008247851	917	0	PREDICTED: Prunus mume annexin D4-like (LOC103344228), partial mRNA	K17099	ANXA13	annexin A13	http://www.genome.jp/dbget-bin/www_bget?ko:K17099	Q9ZVJ6	723	4.8e-75	Annexin D4 OS=Arabidopsis thaliana OX=3702 GN=ANN4 PE=1 SV=1	PF00191	Annexin	--	--	GO:0005544//GO:0005509	calcium-dependent phospholipid binding//calcium ion binding	--	--	KOG0819	Annexin	DOWN	-6.6611	3.9873e-108	blast,frame:-2 start:952 end:191	Category 2
Cluster-6671.14286	5	10	12.05	34.44	24	39	0.65	1.16	1.31	2.88	1.9	3.57	765	7861423	ONI12007.1	273	1e-21	hypothetical protein PRUPE_4G139500 [Prunus persica]	XR_001677524.1	XR_001677524	149	6.51872e-70	PREDICTED: Prunus mume uncharacterized LOC107880770 (LOC107880770), ncRNA	--	--	--	--	O81832	161	4.5e-10	G-type lectin S-receptor-like serine/threonine-protein kinase At4g27290 OS=Arabidopsis thaliana OX=3702 GN=At4g27290 PE=3 SV=4	PF07714	Protein tyrosine kinase	GO:0006468	protein phosphorylation	GO:0004672	protein kinase activity	--	--	--	--	DOWN	-1.5078	0.017827	blast,frame:3 start:663 end:764	Category 2
Cluster-6671.14323	4	2	2	47.06	34.99	22	0.63	0.28	0.26	4.71	3.31	2.41	683	--	--	--	--	--	XM_007214218.1	XM_007214218	115	4.60241e-51	Prunus persica hypothetical protein (PRUPE_ppa026535mg) mRNA, partial cds	K04733	IRAK4	interleukin-1 receptor-associated kinase 4	http://www.genome.jp/dbget-bin/www_bget?ko:K04733	C0LGH3	176	7.3e-12	Probable LRR receptor-like serine/threonine-protein kinase At1g56140 OS=Arabidopsis thaliana OX=3702 GN=At1g56140 PE=2 SV=2	PF07714//PF00069	Protein tyrosine kinase//Protein kinase domain	GO:0006468	protein phosphorylation	GO:0004672//GO:0005524	protein kinase activity//ATP binding	--	--	--	--	DOWN	-3.3184	1.9563e-05	estscan,start:683 end:548; minus strand	Category 2
Cluster-6671.14341	125	105	109	1095	1359	1141	2.04	1.57	1.51	11.98	14.15	13.62	4067	3505886	XP_008240010.1	624	1.1e-61	PREDICTED: ninja-family protein 1-like [Prunus mume]	XM_008241788.1	XM_008241788	524	0	PREDICTED: Prunus mume ninja-family protein 1-like (LOC103338571), mRNA	--	--	--	--	Q10Q07	221	2.6e-16	Ninja-family protein MODD OS=Oryza sativa subsp. japonica OX=39947 GN=MODD PE=1 SV=1	PF01342//PF10716//PF07966	SAND domain//NADH dehydrogenase transmembrane subunit//A1 Propeptide	GO:0006508//GO:0006118//GO:0055114	proteolysis//obsolete electron transport//oxidation-reduction process	GO:0003677//GO:0004190//GO:0016655	DNA binding//aspartic-type endopeptidase activity//oxidoreductase activity, acting on NAD(P)H, quinone or similar compound as acceptor	--	--	--	--	DOWN	-3.0323	4.6564e-115	blast,frame:-2 start:3325 end:2687|blast,frame:-3 start:624 end:160	Category 2
Cluster-6671.1501	318	317	376	211	160	164	17.59	15.85	17.53	7.7	5.54	6.53	1409	3494732	XP_008224360.1	1250	9.5e-135	PREDICTED: phosphoenolpyruvate carboxylase kinase 1-like [Prunus mume]	XM_008226138.1	XM_008226138	787	0	PREDICTED: Prunus mume phosphoenolpyruvate carboxylase kinase 1-like (LOC103324100), mRNA	--	--	--	--	Q9SPK4	713	8.1e-74	Phosphoenolpyruvate carboxylase kinase 1 OS=Arabidopsis thaliana OX=3702 GN=PPCK1 PE=1 SV=1	PF06293//PF00069//PF07714	Lipopolysaccharide kinase (Kdo/WaaP) family//Protein kinase domain//Protein tyrosine kinase	GO:0006468	protein phosphorylation	GO:0004672//GO:0005524//GO:0016773	protein kinase activity//ATP binding//phosphotransferase activity, alcohol group as acceptor	GO:0016020	membrane	--	--	UP	1.2802	6.0168e-15	blast,frame:3 start:3 end:821	Category 2
Cluster-6671.15114	53	98.05	84	339	549	448	1.52	2.57	2.05	6.49	9.99	9.36	2441	3498825	XP_008230137.1	2866	0	PREDICTED: G-type lectin S-receptor-like serine..threonine-protein kinase At4g27290 isoform X1 [Prunus mume]	XM_008231915.2	XM_008231915	2107	0	PREDICTED: Prunus mume G-type lectin S-receptor-like serine/threonine-protein kinase At4g27290 (LOC103329440), transcript variant X1, mRNA	--	--	--	--	Q9SXB8	883	2.7e-93	G-type lectin S-receptor-like serine/threonine-protein kinase At1g11330 OS=Arabidopsis thaliana OX=3702 GN=At1g11330 PE=1 SV=3	PF00954//PF00069//PF07714	S-locus glycoprotein domain//Protein kinase domain//Protein tyrosine kinase	GO:0048544//GO:0006468	recognition of pollen//protein phosphorylation	GO:0005524//GO:0004672	ATP binding//protein kinase activity	--	--	--	--	DOWN	-2.1422	2.7216e-25	estscan,start:652 end:2441	Category 2
Cluster-6671.15115	99	139	147	41	42.77	45	13.29	16.51	16.37	3.52	3.48	4.24	752	6534677	XP_016649004.1	1212	1.3e-130	PREDICTED: LOW QUALITY PROTEIN: uncharacterized protein LOC103329478 [Prunus mume]	XM_016793518.1	XM_016793518	743	0	PREDICTED: Prunus mume uncharacterized LOC103329478 (LOC103329478), mRNA	--	--	--	--	Q8GYA4	767	2.4e-80	Cysteine-rich receptor-like protein kinase 10 OS=Arabidopsis thaliana OX=3702 GN=CRK10 PE=1 SV=3	PF00069//PF07714	Protein kinase domain//Protein tyrosine kinase	GO:0006468	protein phosphorylation	GO:0004672//GO:0005524	protein kinase activity//ATP binding	--	--	--	--	UP	1.9345	8.1704e-14	estscan,start:1 end:752	Category 2
Cluster-6671.1532	508	526	588	284.92	287	269	23.89	22.41	23.34	8.86	8.48	9.13	1606	3509254	XP_008244696.1	1318	1.4e-142	PREDICTED: serine..threonine-protein kinase OXI1 [Prunus mume]	XM_008246474.2	XM_008246474	920	0	PREDICTED: Prunus mume serine/threonine-protein kinase OXI1 (LOC103342815), mRNA	--	--	--	--	Q9LSF1	834	8.6e-88	Serine/threonine-protein kinase OXI1 OS=Arabidopsis thaliana OX=3702 GN=OXI1 PE=1 SV=1	PF15200//PF07714//PF00069	Keratinocyte differentiation-associated//Protein tyrosine kinase//Protein kinase domain	GO:0006468	protein phosphorylation	GO:0004672//GO:0005524	protein kinase activity//ATP binding	GO:0005576	extracellular region	--	--	UP	1.3133	7.4242e-28	blast,frame:-2 start:1074 end:160|blast,frame:-3 start:1604 end:1143	Category 2
Cluster-6671.15437	284	293.59	311	1005.53	1130.08	1015.69	5.49	5.18	5.1	12.99	13.89	14.32	3486	7848257	ONH98840.1	2226	1.6e-247	hypothetical protein PRUPE_7G268300 [Prunus persica]	XM_008244831.2	XM_008244831	1776	0	PREDICTED: Prunus mume dual specificity protein kinase shkC (LOC103341326), mRNA	--	--	--	--	F4IS56	1817	1.9e-201	Integrin-linked protein kinase 1 OS=Arabidopsis thaliana OX=3702 GN=ILK1 PE=1 SV=1	PF13606//PF06293//PF00023//PF00069//PF07714	Ankyrin repeat//Lipopolysaccharide kinase (Kdo/WaaP) family//Ankyrin repeat//Protein kinase domain//Protein tyrosine kinase	GO:0006468	protein phosphorylation	GO:0005515//GO:0016773//GO:0005524//GO:0004672	protein binding//phosphotransferase activity, alcohol group as acceptor//ATP binding//protein kinase activity	GO:0016020	membrane	--	--	DOWN	-1.4579	2.1786e-43	blast,frame:1 start:613 end:1920	Category 2
Cluster-6671.15503	161.06	182.09	199	520.01	521.26	453	3.09	3.19	3.24	6.67	6.36	6.34	3508	7882199	ONI32783.1	601	4.3e-59	hypothetical protein PRUPE_1G385300 [Prunus persica]	XR_001677355.1	XR_001677355	915	0	PREDICTED: Prunus mume uncharacterized LOC107880515 (LOC107880515), ncRNA	--	--	--	--	--	--	--	--	PF12201	Bcl2-interacting killer, BH3-domain containing	GO:0006915	apoptotic process	--	--	--	--	--	--	DOWN	-1.0974	2.3936e-15	blast,frame:1 start:70 end:489|blast,frame:3 start:1803 end:2210|blast,frame:2 start:1400 end:1744	Category 2
Cluster-6671.15952	150.74	146.55	172	68.94	95.93	89.78	14.11	12.27	13.46	4.19	5.53	5.97	953	6536777	XP_016650918.1	1250	6.4e-135	PREDICTED: TMV resistance protein N-like [Prunus mume]	XR_001678161.1	XR_001678161	706	0	PREDICTED: Prunus mume TMV resistance protein N-like (LOC103336586), transcript variant X4, misc_RNA	--	--	--	--	Q40392	286	1.8e-24	TMV resistance protein N OS=Nicotiana glutinosa OX=35889 GN=N PE=1 SV=1	PF13855//PF09057//PF00560	Leucine rich repeat//Second Mitochondria-derived Activator of Caspases//Leucine Rich Repeat	GO:0006919//GO:0006915	activation of cysteine-type endopeptidase activity involved in apoptotic process//apoptotic process	GO:0005515	protein binding	GO:0005739	mitochondrion	--	--	UP	1.2497	1.2901e-08	estscan,start:953 end:1; minus strand	Category 2
Cluster-6671.16138	127	141	165.83	382	434.99	367.99	2.55	2.59	2.83	5.13	5.56	5.4	3361	8261891	XP_020413072.1	1007	3.4e-106	metalloendoproteinase 5-MMP [Prunus persica]	XM_008235014.2	XM_008235014	926	0	PREDICTED: Prunus mume metalloendoproteinase 5-MMP-like (LOC103332291), mRNA	--	--	--	--	O04529	298	2.6e-25	Metalloendoproteinase 2-MMP OS=Arabidopsis thaliana OX=3702 GN=2MMP PE=1 SV=1	PF00413//PF07998//PF01048//PF01400//PF06743//PF10462	Matrixin//Peptidase family M54//Phosphorylase superfamily//Astacin (Peptidase family M12A)//FAST kinase-like protein, subdomain 1//Peptidase M66	GO:0009116//GO:0006508	nucleoside metabolic process//proteolysis	GO:0004672//GO:0008270//GO:0003824//GO:0004222	protein kinase activity//zinc ion binding//catalytic activity//metalloendopeptidase activity	GO:0031012	extracellular matrix	--	--	DOWN	-1.0836	1.474e-12	blast,frame:1 start:565 end:1008|blast,frame:2 start:2 end:643	Category 2
Cluster-6671.17369	87	114	111	347	338.02	318	1.56	1.86	1.69	4.15	3.85	4.15	3744	3500170	XP_008232078.1	2983	0	PREDICTED: rust resistance kinase Lr10-like [Prunus mume]	XM_008233856.2	XM_008233856	1827	0	PREDICTED: Prunus mume rust resistance kinase Lr10-like (LOC103331238), mRNA	--	--	--	--	P93604	1023	2.4e-109	Rust resistance kinase Lr10 OS=Triticum aestivum OX=4565 GN=LRK10 PE=2 SV=1	PF13947//PF00069//PF02083//PF06144//PF07714	Wall-associated receptor kinase galacturonan-binding//Protein kinase domain//Urotensin II//DNA polymerase III, delta subunit//Protein tyrosine kinase	GO:0006260//GO:0006468//GO:0008217//GO:0007165//GO:0042312	DNA replication//protein phosphorylation//regulation of blood pressure//signal transduction//regulation of vasodilation	GO:0005179//GO:0030247//GO:0005524//GO:0003677//GO:0003887//GO:0004672	hormone activity//polysaccharide binding//ATP binding//DNA binding//DNA-directed DNA polymerase activity//protein kinase activity	GO:0009360//GO:0042575//GO:0005576	DNA polymerase III complex//DNA polymerase complex//extracellular region	--	--	DOWN	-1.3219	1.9743e-14	blast,frame:3 start:3 end:1817|blast,frame:1 start:3058 end:3297	Category 2
Cluster-6671.17393	24	41	57	394	480	391	0.46	0.71	0.92	5	5.8	5.42	3543	7845640	ONH96223.1	2594	3.4e-290	hypothetical protein PRUPE_7G114300 [Prunus persica]	XM_007203607.1	XM_007203607	1437	0	Prunus persica hypothetical protein (PRUPE_ppa026851mg) mRNA, complete cds	--	--	--	--	Q9LZS6	1676	4.4e-185	Subtilisin-like protease SBT4.15 OS=Arabidopsis thaliana OX=3702 GN=SBT4.15 PE=3 SV=1	PF00082//PF00452	Subtilase family//Apoptosis regulator proteins, Bcl-2 family	GO:0006508//GO:0042981	proteolysis//regulation of apoptotic process	GO:0004252	serine-type endopeptidase activity	--	--	--	--	DOWN	-3.0149	5.442e-47	blast,frame:2 start:2036 end:2629|blast,frame:3 start:411 end:2012	Category 2
Cluster-6671.17492	419	452	440	245	194	248	17.67	17.3	15.68	6.84	5.15	7.56	1757	3492069	XP_008220627.1	2313	6.5e-258	PREDICTED: aspartyl protease family protein At5g10770-like [Prunus mume]	XM_008222405.2	XM_008222405	1392	0	PREDICTED: Prunus mume aspartyl protease family protein At5g10770-like (LOC103320693), mRNA	--	--	--	--	Q8S9J6	1141	2.4e-123	Aspartyl protease family protein At5g10770 OS=Arabidopsis thaliana OX=3702 GN=At5g10770 PE=2 SV=1	PF00026	Eukaryotic aspartyl protease	GO:0006508	proteolysis	GO:0004190	aspartic-type endopeptidase activity	--	--	--	--	UP	1.2931	7.4623e-17	blast,frame:3 start:3 end:1526	Category 2
Cluster-6671.17541	534.21	551	576.35	214	256	198.99	14.47	13.6	13.23	3.86	4.39	3.92	2572	8267803	XP_020418490.1	2628	2.8e-294	wall-associated receptor kinase 2 [Prunus persica]	XM_007212324.1	XM_007212324	768	0	Prunus persica hypothetical protein (PRUPE_ppa016247mg) mRNA, partial cds	--	--	--	--	Q9LMP1	1071	4.5e-115	Wall-associated receptor kinase 2 OS=Arabidopsis thaliana OX=3702 GN=WAK2 PE=1 SV=1	PF08488//PF00069//PF00008//PF13947//PF07645//PF07714	Wall-associated kinase//Protein kinase domain//EGF-like domain//Wall-associated receptor kinase galacturonan-binding//Calcium-binding EGF domain//Protein tyrosine kinase	GO:0009069//GO:0016310//GO:0006468	serine family amino acid metabolic process//phosphorylation//protein phosphorylation	GO:0004672//GO:0005509//GO:0030247//GO:0004674//GO:0005515//GO:0005524	protein kinase activity//calcium ion binding//polysaccharide binding//protein serine/threonine kinase activity//protein binding//ATP binding	GO:0016021	integral component of membrane	--	--	UP	1.6843	2.3897e-41	blast,frame:-3 start:2570 end:207	Category 2
Cluster-6671.17790	8	10	19	419	362	365	0.29	0.33	0.59	10.21	8.39	9.71	1974	3495758	XP_008225735.1	2299	3.1e-256	PREDICTED: aspartic proteinase nepenthesin-1 [Prunus mume]	XM_008227513.1	XM_008227513	1700	0	PREDICTED: Prunus mume aspartic proteinase nepenthesin-1 (LOC103325350), mRNA	--	--	--	--	Q940R4	485	3.1e-47	Probable aspartyl protease At4g16563 OS=Arabidopsis thaliana OX=3702 GN=At4g16563 PE=2 SV=1	PF00026	Eukaryotic aspartyl protease	GO:0006508	proteolysis	GO:0004190	aspartic-type endopeptidase activity	--	--	--	--	DOWN	-4.5961	1.3966e-54	blast,frame:3 start:147 end:1640	Category 2
Cluster-6671.18097	53	54	82	300.05	309	217	0.83	0.77	1.09	3.13	3.07	2.47	4253	567647	CAN79061.1	2256	6.4e-251	hypothetical protein VITISV_024577 [Vitis vinifera]	XM_008246841.2	XM_008246841	597	0	PREDICTED: Prunus mume uncharacterized LOC103343169 (LOC103343169), mRNA	--	--	--	--	Q9ZT94	870	1.5e-91	Retrovirus-related Pol polyprotein from transposon RE2 OS=Arabidopsis thaliana OX=3702 GN=RE2 PE=4 SV=1	PF04103//PF02728//PF00665//PF05757	CD20-like family//Copper amine oxidase, N3 domain//Integrase core domain//Oxygen evolving enhancer protein 3 (PsbQ)	GO:0055114//GO:0009308//GO:0015074//GO:0015979	oxidation-reduction process//amine metabolic process//DNA integration//photosynthesis	GO:0048038//GO:0005507//GO:0008131//GO:0005509	quinone binding//copper ion binding//primary amine oxidase activity//calcium ion binding	GO:0016021//GO:0009654//GO:0009523//GO:0019898	integral component of membrane//photosystem II oxygen evolving complex//photosystem II//extrinsic component of membrane	--	--	DOWN	-1.7621	2.4737e-16	blast,frame:1 start:2530 end:2826	Category 2
Cluster-6671.18161	7	1	2	94.73	72	51	0.38	0.05	0.09	3.37	2.43	1.98	1439	6534676	XP_016649003.1	757	1.4e-77	PREDICTED: uncharacterized protein LOC103329477 [Prunus mume]	XM_016793510.1	XM_016793510	435	0	PREDICTED: Prunus mume G-type lectin S-receptor-like serine/threonine-protein kinase At4g27290 (LOC103329378), mRNA	--	--	--	--	Q8GYA4	519	2.6e-51	Cysteine-rich receptor-like protein kinase 10 OS=Arabidopsis thaliana OX=3702 GN=CRK10 PE=1 SV=3	PF00069//PF07714	Protein kinase domain//Protein tyrosine kinase	GO:0006468	protein phosphorylation	GO:0004672//GO:0005524	protein kinase activity//ATP binding	--	--	--	--	DOWN	-4.0612	7.5376e-11	blast,frame:-3 start:588 end:355	Category 2
Cluster-6671.19022	67	94	109	292	262	273	2.03	2.59	2.8	5.89	5.02	6.01	2331	9080217	XP_021813801.1	3035	0	wall-associated receptor kinase-like 20 [Prunus avium]	XM_008235265.2	XM_008235265	2094	0	PREDICTED: Prunus mume wall-associated receptor kinase-like 20 (LOC103332526), mRNA	--	--	--	--	Q9LZM4	1770	3.6e-196	Wall-associated receptor kinase-like 20 OS=Arabidopsis thaliana OX=3702 GN=WAKL20 PE=2 SV=1	PF13947//PF00069//PF11770//PF07714	Wall-associated receptor kinase galacturonan-binding//Protein kinase domain//GRB2-binding adapter (GAPT)//Protein tyrosine kinase	GO:0006468	protein phosphorylation	GO:0004672//GO:0005524//GO:0030247	protein kinase activity//ATP binding//polysaccharide binding	GO:0016021	integral component of membrane	--	--	DOWN	-1.2607	2.3872e-10	blast,frame:3 start:24 end:2087	Category 2
Cluster-6671.19054	62	51	46	416	495	487	2	1.5	1.26	8.94	10.11	11.42	2204	3493802	XP_008223070.1	2492	1.4e-278	PREDICTED: receptor-like cytosolic serine..threonine-protein kinase RBK2 [Prunus mume]	XM_008224848.2	XM_008224848	1981	0	PREDICTED: Prunus mume receptor-like cytosolic serine/threonine-protein kinase RBK2 (LOC103322896), mRNA	--	--	--	--	Q8RXC8	1198	7.3e-130	Receptor-like cytosolic serine/threonine-protein kinase RBK2 OS=Arabidopsis thaliana OX=3702 GN=RBK2 PE=1 SV=1	PF07714//PF00069	Protein tyrosine kinase//Protein kinase domain	GO:0006468	protein phosphorylation	GO:0005524//GO:0004672	ATP binding//protein kinase activity	--	--	--	--	DOWN	-2.7641	9.6203e-47	blast,frame:-3 start:1998 end:421	Category 2
Cluster-6671.19197	0	3	1	53	55	37	0	0.71	0.22	8.97	8.77	6.88	510	7841952	ONH92535.1	227	1.4e-16	hypothetical protein PRUPE_8G179600 [Prunus persica]	XM_007199625.1	XM_007199625	269	8.32185e-137	Prunus persica hypothetical protein (PRUPE_ppa000433mg) mRNA, complete cds	--	--	--	--	--	--	--	--	PF13202//PF13499//PF13405//PF00036	EF hand//EF-hand domain pair//EF-hand domain//EF hand	--	--	GO:0005509	calcium ion binding	--	--	--	--	DOWN	-4.8103	9.0257e-08	blast,frame:2 start:128 end:379	Category 2
Cluster-6671.19399	11	9	19	47	63	71	0.69	0.51	1	1.93	2.46	3.19	1280	8276159	XP_020426203.1	525	1e-50	alpha-protein kinase 1-like [Prunus persica]	XM_011461451.1	XM_011461451	126	6.77502e-57	PREDICTED: Fragaria vesca subsp. vesca uncharacterized LOC105350079 (LOC105350079), mRNA	--	--	--	--	--	--	--	--	PF05456//PF06682	Eukaryotic translation initiation factor 4E binding protein (EIF4EBP)//SOCE-associated regulatory factor of calcium homoeostasis	GO:0045947//GO:2001256	negative regulation of translational initiation//regulation of store-operated calcium entry	GO:0008190	eukaryotic initiation factor 4E binding	GO:0030176	integral component of endoplasmic reticulum membrane	--	--	DOWN	-1.862	5.8515e-05	blast,frame:-1 start:743 end:237	Category 2
Cluster-6671.19411	48	47	41	314	360	328	2.53	2.24	1.82	10.92	11.9	12.46	1464	3498706	XP_008229972.1	2101	2.1e-233	PREDICTED: mitogen-activated protein kinase kinase kinase 2 [Prunus mume]	XM_008231750.2	XM_008231750	1401	0	PREDICTED: Prunus mume mitogen-activated protein kinase kinase kinase 2 (LOC103329302), mRNA	--	--	--	--	Q9ZVP5	840	1.6e-88	Mitogen-activated protein kinase kinase kinase 18 OS=Arabidopsis thaliana OX=3702 GN=MAPKKK18 PE=1 SV=1	PF06455//PF00069//PF00665//PF07714	NADH dehydrogenase subunit 5 C-terminus//Protein kinase domain//Integrase core domain//Protein tyrosine kinase	GO:0015992//GO:0006814//GO:0015074//GO:0055114//GO:0006468//GO:0006744//GO:0042773//GO:0006120	proton transport//sodium ion transport//DNA integration//oxidation-reduction process//protein phosphorylation//ubiquinone biosynthetic process//ATP synthesis coupled electron transport//mitochondrial electron transport, NADH to ubiquinone	GO:0004672//GO:0008137//GO:0005524	protein kinase activity//NADH dehydrogenase (ubiquinone) activity//ATP binding	--	--	--	--	DOWN	-2.51	6.1769e-35	blast,frame:-2 start:1463 end:96	Category 2
Cluster-6671.19530	33	35	43	244	298	261	0.87	0.84	0.96	4.27	4.96	4.99	2643	3499399	XP_008230910.1	2664	1.9e-298	PREDICTED: receptor-like protein kinase FERONIA [Prunus mume]	XM_008232688.1	XM_008232688	1865	0	PREDICTED: Prunus mume receptor-like protein kinase FERONIA (LOC103330131), mRNA	--	--	--	--	Q9SCZ4	1457	8.1e-160	Receptor-like protein kinase FERONIA OS=Arabidopsis thaliana OX=3702 GN=FER PE=1 SV=1	PF07714//PF01241//PF00069	Protein tyrosine kinase//Photosystem I psaG / psaK//Protein kinase domain	GO:0015979//GO:0006468	photosynthesis//protein phosphorylation	GO:0004672//GO:0005524	protein kinase activity//ATP binding	GO:0016020//GO:0009522	membrane//photosystem I	--	--	DOWN	-2.489	7.5253e-29	blast,frame:-1 start:1956 end:286|blast,frame:-2 start:2342 end:1920	Category 2
Cluster-6671.19571	334.06	414.93	421	142	186.97	165.98	9.81	11.1	10.48	2.78	3.48	3.54	2394	3502519	XP_008235262.1	507	2.3e-48	PREDICTED: F-box protein At2g27310-like [Prunus mume]	XM_008237041.2	XM_008237041	337	6.51476e-174	PREDICTED: Prunus mume F-box protein At2g27310-like (LOC103334104), transcript variant X2, mRNA	--	--	--	--	--	--	--	--	PF05381//PF00646//PF12937	Tymovirus endopeptidase//F-box domain//F-box-like	GO:0006508//GO:0016032	proteolysis//viral process	GO:0004197//GO:0005515	cysteine-type endopeptidase activity//protein binding	--	--	--	--	UP	1.6063	4.8808e-27	blast,frame:-2 start:446 end:3	Category 2
Cluster-6671.19798	224.26	266	254	125.68	90	82	12.43	13.33	11.86	4.59	3.12	3.27	1407	3496551	XP_008226906.1	532	1.7e-51	PREDICTED: NEP1-interacting protein 2 isoform X3 [Prunus mume]	XM_007213776.1	XM_007213776	412	0	Prunus persica hypothetical protein (PRUPE_ppa010852mg) mRNA, complete cds	--	--	--	--	Q8GT75	234	2.8e-18	NEP1-interacting protein 1 OS=Arabidopsis thaliana OX=3702 GN=NIP1 PE=1 SV=2	PF12906//PF00097//PF17123//PF05353//PF07694//PF13639//PF11789//PF12861//PF05433//PF12678//PF14634	RING-variant domain//Zinc finger, C3HC4 type (RING finger)//RING-like zinc finger//Delta Atracotoxin//5TMR of 5TMR-LYT//Ring finger domain//Zinc-finger of the MIZ type in Nse subunit//Anaphase-promoting complex subunit 11 RING-H2 finger//Glycine zipper 2TM domain//RING-H2 zinc finger//zinc-RING finger domain	GO:0009405//GO:0000160//GO:0016310//GO:0006810//GO:0071555//GO:0016567	pathogenesis//phosphorelay signal transduction system//phosphorylation//transport//cell wall organization//protein ubiquitination	GO:0004673//GO:0046872//GO:0019871//GO:0008270//GO:0005515//GO:0004842//GO:0000155	protein histidine kinase activity//metal ion binding//sodium channel inhibitor activity//zinc ion binding//protein binding//ubiquitin-protein transferase activity//phosphorelay sensor kinase activity	GO:0019867//GO:0016021//GO:0005576//GO:0005680//GO:0009365	outer membrane//integral component of membrane//extracellular region//anaphase-promoting complex//protein histidine kinase complex	--	--	UP	1.6853	1.0881e-17	blast,frame:3 start:3 end:416|blast,frame:2 start:755 end:1123	Category 2
Cluster-6671.19806	17	29	16	70	53	40	1.47	2.24	1.16	3.94	2.83	2.46	1008	3496441	XP_008226730.1	706	8.1e-72	PREDICTED: calcium-binding protein PBP1 [Prunus mume]	XM_008228508.1	XM_008228508	671	0	PREDICTED: Prunus mume calcium-binding protein PBP1 (LOC103326296), mRNA	--	--	--	--	O81831	310	3.1e-27	Calcium-binding protein KRP1 OS=Arabidopsis thaliana OX=3702 GN=KRP1 PE=2 SV=1	PF00036//PF13202//PF13833//PF12763	EF hand//EF hand//EF-hand domain pair//Cytoskeletal-regulatory complex EF hand	--	--	GO:0005509//GO:0005515	calcium ion binding//protein binding	--	--	--	--	DOWN	-1.0225	0.035428	blast,frame:2 start:185 end:598	Category 2
Cluster-6671.20021	59.37	40.06	48.21	36.09	28.89	23.2	3.36	2.05	2.3	1.35	1.02	0.95	1383	3490388	XP_008218255.1	1630	8e-179	PREDICTED: probable aldo-keto reductase 1 [Prunus mume]	XM_008220033.2	XM_008220033	1319	0	PREDICTED: Prunus mume probable aldo-keto reductase 1 (LOC103318629), mRNA	--	--	--	--	C6TBN2	1198	4.6e-130	Probable aldo-keto reductase 1 OS=Glycine max OX=3847 GN=AKR1 PE=2 SV=1	PF02283	Cobinamide kinase / cobinamide phosphate guanyltransferase	GO:0009236//GO:0051188	cobalamin biosynthetic process//cofactor biosynthetic process	GO:0043752//GO:0000166	adenosylcobinamide kinase activity//nucleotide binding	--	--	--	--	UP	1.1194	0.007585	blast,frame:1 start:154 end:1257	Category 2
Cluster-6671.20362	54	41	53	172	198.8	166.09	2.13	1.47	1.76	4.49	4.93	4.73	1861	3505551	XP_008239542.1	1619	2e-177	PREDICTED: transcription factor bHLH137 isoform X2 [Prunus mume]	XM_008241320.2	XM_008241320	1212	0	PREDICTED: Prunus mume transcription factor bHLH137 (LOC103338133), transcript variant X2, mRNA	--	--	--	--	Q93W88	458	4e-44	Transcription factor bHLH137 OS=Arabidopsis thaliana OX=3702 GN=BHLH137 PE=1 SV=1	PF00010//PF10278//PF06459//PF00830	Helix-loop-helix DNA-binding domain//Mediator of RNA pol II transcription subunit 19//Ryanodine Receptor TM 4-6//Ribosomal L28 family	GO:0006357//GO:0006816//GO:0006874//GO:0042254	regulation of transcription from RNA polymerase II promoter//calcium ion transport//cellular calcium ion homeostasis//ribosome biogenesis	GO:0005219//GO:0003735//GO:0046983//GO:0001104	ryanodine-sensitive calcium-release channel activity//structural constituent of ribosome//protein dimerization activity//RNA polymerase II transcription cofactor activity	GO:0016592//GO:0005622//GO:0016021//GO:0005840	mediator complex//intracellular//integral component of membrane//ribosome	--	--	DOWN	-1.4868	6.3535e-10	blast,frame:-3 start:1730 end:654	Category 2
Cluster-6671.20445	373.75	390.41	366.01	146.98	198.5	136.96	13.06	12.41	10.83	3.41	4.38	3.47	2059	--	--	--	--	--	XM_007213378.1	XM_007213378	1474	0	Prunus persica hypothetical protein (PRUPE_ppa025278mg) mRNA, partial cds	--	--	--	--	Q9T0J1	1127	1.2e-121	Cysteine-rich receptor-like protein kinase 26 OS=Arabidopsis thaliana OX=3702 GN=CRK26 PE=2 SV=1	PF07714//PF00069//PF05434	Protein tyrosine kinase//Protein kinase domain//TMEM9	GO:0006468	protein phosphorylation	GO:0004672//GO:0005524	protein kinase activity//ATP binding	GO:0016021	integral component of membrane	--	--	UP	1.6077	8.1261e-25	blast,frame:2 start:128 end:1954	Category 2
Cluster-6671.20599	523	532	586	320	371.96	298	12.79	11.87	12.16	5.22	5.77	5.31	2816	--	--	--	--	--	XM_008236401.2	XM_008236401	1860	0	PREDICTED: Prunus mume uncharacterized calcium-binding protein At1g02270 (LOC103333549), mRNA	--	--	--	--	O81916	1480	1.9e-162	Uncharacterized calcium-binding protein At1g02270 OS=Arabidopsis thaliana OX=3702 GN=At1g02270 PE=2 SV=2	PF13405//PF00036//PF08039//PF13202//PF07648//PF13833//PF13499	EF-hand domain//EF hand//Mitochondrial proteolipid//EF hand//Kazal-type serine protease inhibitor domain//EF-hand domain pair//EF-hand domain pair	--	--	GO:0005515//GO:0005509	protein binding//calcium ion binding	GO:0005739	mitochondrion	--	--	UP	1.0997	1.0132e-20	blast,frame:-3 start:2031 end:646	Category 2
Cluster-6671.2083	0	7	6	93	96	69	0	0.35	0.28	3.44	3.37	2.79	1394	7851992	ONI02576.1	1663	1.2e-182	hypothetical protein PRUPE_6G207700 [Prunus persica]	XM_008238312.2	XM_008238312	1219	0	PREDICTED: Prunus mume probable mannitol dehydrogenase (LOC103335298), transcript variant X1, mRNA	K00083	E1.1.1.195	cinnamyl-alcohol dehydrogenase	http://www.genome.jp/dbget-bin/www_bget?ko:K00083	Q9ZRF1	1407	2.7e-154	Probable mannitol dehydrogenase OS=Fragaria ananassa OX=3747 GN=CAD PE=2 SV=1	PF08240//PF02737//PF00070//PF13241//PF02826//PF02629//PF00107//PF00106	Alcohol dehydrogenase GroES-like domain//3-hydroxyacyl-CoA dehydrogenase, NAD binding domain//Pyridine nucleotide-disulphide oxidoreductase//Putative NAD(P)-binding//D-isomer specific 2-hydroxyacid dehydrogenase, NAD binding domain//CoA binding domain//Zinc-binding dehydrogenase//short chain dehydrogenase	GO:0006568//GO:0018874//GO:0019354//GO:0006554//GO:0006631//GO:0006552//GO:0006633//GO:0006779//GO:0006550//GO:0055114//GO:0006574//GO:0008152	tryptophan metabolic process//benzoate metabolic process//siroheme biosynthetic process//lysine catabolic process//fatty acid metabolic process//leucine catabolic process//fatty acid biosynthetic process//porphyrin-containing compound biosynthetic process//isoleucine catabolic process//oxidation-reduction process//valine catabolic process//metabolic process	GO:0051287//GO:0043115//GO:0016491//GO:0003857//GO:0048037	NAD binding//precorrin-2 dehydrogenase activity//oxidoreductase activity//3-hydroxyacyl-CoA dehydrogenase activity//cofactor binding	--	--	--	--	DOWN	-3.9506	3.4373e-13	blast,frame:-3 start:1353 end:250	Category 2
Cluster-6671.20867	31	37	27	93	99	89	1.69	1.82	1.24	3.34	3.38	3.5	1425	8265852	XP_007217590.2	1751	7.7e-193	mitogen-activated protein kinase kinase kinase 2 [Prunus persica]	XM_008230601.1	XM_008230601	1203	0	PREDICTED: Prunus mume mitogen-activated protein kinase kinase kinase ANP1-like (LOC103328206), mRNA	--	--	--	--	O80888	339	1.9e-30	Mitogen-activated protein kinase kinase kinase 17 OS=Arabidopsis thaliana OX=3702 GN=MAPKKK17 PE=1 SV=1	PF07714//PF00069//PF05445	Protein tyrosine kinase//Protein kinase domain//Poxvirus serine/threonine protein kinase	GO:0006468	protein phosphorylation	GO:0004672//GO:0005524	protein kinase activity//ATP binding	--	--	--	--	DOWN	-1.1925	0.00027027	blast,frame:-1 start:1413 end:220	Category 2
Cluster-6671.21578	83.98	99	92.49	219.26	302.15	280.88	1.66	1.79	1.55	2.9	3.8	4.05	3413	3496218	XP_008226418.1	3228	0	PREDICTED: L-type lectin-domain containing receptor kinase IX.1-like [Prunus mume]	XM_008228196.2	XM_008228196	2350	0	PREDICTED: Prunus mume L-type lectin-domain containing receptor kinase IX.1-like (LOC103325998), mRNA	--	--	--	--	Q9LXA5	1245	4e-135	L-type lectin-domain containing receptor kinase IX.1 OS=Arabidopsis thaliana OX=3702 GN=LECRK91 PE=1 SV=1	PF00069//PF00139//PF07714//PF05430	Protein kinase domain//Legume lectin domain//Protein tyrosine kinase//S-adenosyl-L-methionine-dependent methyltransferase	GO:0055114//GO:0006468	oxidation-reduction process//protein phosphorylation	GO:0030246//GO:0016645//GO:0004672//GO:0005524	carbohydrate binding//oxidoreductase activity, acting on the CH-NH group of donors//protein kinase activity//ATP binding	--	--	--	--	DOWN	-1.1761	4.7901e-09	blast,frame:-1 start:3413 end:957	Category 2
Cluster-6671.21767	285	237	282	738	784	646	6.88	5.22	5.77	11.88	12.01	11.35	2850	3495033	XP_008224765.1	2232	2.6e-248	PREDICTED: cysteine-rich receptor-like protein kinase 10 [Prunus mume]	XM_008226543.1	XM_008226543	1607	0	PREDICTED: Prunus mume cysteine-rich receptor-like protein kinase 10 (LOC103324484), mRNA	--	--	--	--	Q9M0X5	1176	3.4e-127	Cysteine-rich receptor-like protein kinase 25 OS=Arabidopsis thaliana OX=3702 GN=CRK25 PE=3 SV=1	PF11883//PF00069//PF07714//PF10099//PF01213	Domain of unknown function (DUF3403)//Protein kinase domain//Protein tyrosine kinase//Anti-sigma-K factor rskA//Adenylate cyclase associated (CAP) N terminal	GO:0009069//GO:0007010//GO:0016310//GO:0006468	serine family amino acid metabolic process//cytoskeleton organization//phosphorylation//protein phosphorylation	GO:0004672//GO:0003779//GO:0004674//GO:0005524	protein kinase activity//actin binding//protein serine/threonine kinase activity//ATP binding	GO:0016021//GO:0005886	integral component of membrane//plasma membrane	--	--	DOWN	-1.0578	2.3453e-16	blast,frame:3 start:1992 end:2531|blast,frame:2 start:182 end:1744	Category 2
Cluster-6671.21810	125	134.02	120	386	351	346.01	5.18	5.04	4.2	10.6	9.16	10.37	1783	3503273	XP_008236269.1	1589	5.9e-174	PREDICTED: non-functional pseudokinase ZED1-like [Prunus mume]	XM_008238047.2	XM_008238047	1091	0	PREDICTED: Prunus mume non-functional pseudokinase ZED1-like (LOC103335055), mRNA	--	--	--	--	Q8LGB6	588	3.2e-59	Non-functional pseudokinase ZED1 OS=Arabidopsis thaliana OX=3702 GN=ZED1 PE=1 SV=1	PF07714//PF00069	Protein tyrosine kinase//Protein kinase domain	GO:0006468	protein phosphorylation	GO:0004672//GO:0005524	protein kinase activity//ATP binding	--	--	--	--	DOWN	-1.147	1.4656e-11	blast,frame:3 start:465 end:1589	Category 2
Cluster-6671.2319	210	203	249	844	849	786	5.96	5.25	5.99	15.94	15.25	16.21	2469	3555636	XP_008370510.1	1918	5.8e-212	PREDICTED: aspartic proteinase PCS1-like [Malus domestica]	XM_008235423.2	XM_008235423	1563	0	PREDICTED: Prunus mume aspartic proteinase PCS1 (LOC103332673), mRNA	--	--	--	--	Q9LZL3	1473	1.1e-161	Aspartic proteinase PCS1 OS=Arabidopsis thaliana OX=3702 GN=PCS1 PE=2 SV=1	PF00026	Eukaryotic aspartyl protease	GO:0006508	proteolysis	GO:0004190	aspartic-type endopeptidase activity	--	--	--	--	DOWN	-1.54	5.8062e-38	blast,frame:-1 start:2277 end:979	Category 2
Cluster-6671.2626	524.12	634.01	651	277.01	223.01	223.31	15.6	17.18	16.42	5.49	4.2	4.83	2367	3503439	XP_008236501.1	1758	2e-193	PREDICTED: abscisic acid 8'-hydroxylase 4 [Prunus mume]	XM_008238279.2	XM_008238279	1085	0	PREDICTED: Prunus mume abscisic acid 8'-hydroxylase 4 (LOC103335270), mRNA	K09843	E1.14.13.93	(+)-abscisic acid 8'-hydroxylase	http://www.genome.jp/dbget-bin/www_bget?ko:K09843	Q9LJK2	1279	3.2e-139	Abscisic acid 8'-hydroxylase 4 OS=Arabidopsis thaliana OX=3702 GN=CYP707A4 PE=2 SV=2	PF06426//PF00067	Serine acetyltransferase, N-terminal//Cytochrome P450	GO:0006534//GO:0042967//GO:0055114//GO:0006535	cysteine metabolic process//acyl-carrier-protein biosynthetic process//oxidation-reduction process//cysteine biosynthetic process from serine	GO:0020037//GO:0005506//GO:0009001//GO:0016705	heme binding//iron ion binding//serine O-acetyltransferase activity//oxidoreductase activity, acting on paired donors, with incorporation or reduction of molecular oxygen	GO:0005737	cytoplasm	--	--	UP	1.6842	9.0235e-37	blast,frame:2 start:1853 end:2077	Category 2
Cluster-6671.3598	6	12	11	150	123	93	0.29	0.52	0.44	4.75	3.7	3.21	1583	9070804	XP_021829569.1	1521	4e-166	sulfite oxidase-like [Prunus avium]	XM_016792340.1	XM_016792340	639	0	PREDICTED: Prunus mume sulfite oxidase-like (LOC103322059), mRNA	K00387	SUOX	sulfite oxidase	http://www.genome.jp/dbget-bin/www_bget?ko:K00387	Q9S850	1126	1.2e-121	Sulfite oxidase OS=Arabidopsis thaliana OX=3702 GN=SOX PE=1 SV=1	PF00629//PF00174//PF02971//PF03404//PF00080	MAM domain, meprin/A5/mu//Oxidoreductase molybdopterin binding domain//Formiminotransferase domain//Mo-co oxidoreductase dimerisation domain//Copper/zinc superoxide dismutase (SODC)	GO:0055114//GO:0008152//GO:0042128//GO:0006801	oxidation-reduction process//metabolic process//nitrate assimilation//superoxide metabolic process	GO:0046872//GO:0030151//GO:0016740//GO:0005542//GO:0016491	metal ion binding//molybdenum ion binding//transferase activity//folic acid binding//oxidoreductase activity	GO:0016020	membrane	KOG0535	Sulfite oxidase, molybdopterin-binding component	DOWN	-3.2938	1.2754e-16	blast,frame:-3 start:657 end:469	Category 2
Cluster-6671.3967	89	109	87	317	318	303.02	3.58	3.98	2.96	8.46	8.06	8.83	1827	3489850	XP_008243572.1	1868	2.7e-206	PREDICTED: uncharacterized protein LOC103341794 [Prunus mume]	XM_008245350.1	XM_008245350	1502	0	PREDICTED: Prunus mume uncharacterized LOC103341794 (LOC103341794), mRNA	--	--	--	--	--	--	--	--	PF01080//PF01059	Presenilin//NADH-ubiquinone oxidoreductase chain 4, amino terminus	GO:0055114//GO:0006120	oxidation-reduction process//mitochondrial electron transport, NADH to ubiquinone	GO:0004190	aspartic-type endopeptidase activity	GO:0016021	integral component of membrane	--	--	DOWN	-1.3504	1.608e-13	blast,frame:-3 start:1678 end:335	Category 2
Cluster-6671.4505	334	383	430	904	1233.61	1132	5.21	5.46	5.69	9.43	12.24	12.88	4253	3491042	XP_008219241.1	2469	1.3e-275	PREDICTED: serine..threonine-protein kinase CTR1 [Prunus mume]	XM_008221019.1	XM_008221019	1604	0	PREDICTED: Prunus mume serine/threonine-protein kinase CTR1 (LOC103319476), mRNA	--	--	--	--	Q05609	994	6.4e-106	Serine/threonine-protein kinase CTR1 OS=Arabidopsis thaliana OX=3702 GN=CTR1 PE=1 SV=1	PF04995//PF00069//PF07714	Heme exporter protein D (CcmD)//Protein kinase domain//Protein tyrosine kinase	GO:0015886//GO:0017004//GO:0006468	heme transport//cytochrome complex assembly//protein phosphorylation	GO:0005524//GO:0004672	ATP binding//protein kinase activity	GO:0016021	integral component of membrane	--	--	DOWN	-1.1474	6.1133e-21	blast,frame:-3 start:3642 end:2239	Category 2
Cluster-6671.4745	11	9	30	66	60	48	1.11	0.81	2.53	4.32	3.73	3.44	904	--	--	--	--	--	AB537563.1	AB537563	79	6.33749e-31	Prunus persica S3-RNase gene for S-ribonuclease 3, complete cds	--	--	--	--	--	--	--	--	PF02331	Apoptosis preventing protein	GO:0043066	negative regulation of apoptotic process	GO:0043027	cysteine-type endopeptidase inhibitor activity involved in apoptotic process	--	--	--	--	DOWN	-1.453	0.0031242	estscan,start:807 end:904	Category 2
Cluster-6671.5251	0	0	0	269	299	287	0	0	0	8.99	9.49	10.48	1513	8266037	XP_020416889.1	401	2.9e-36	BAHD acyltransferase At5g47980-like isoform X1 [Prunus persica]	XM_007202692.1	XM_007202692	145	2.20483e-67	Prunus persica hypothetical protein (PRUPE_ppa013349mg) mRNA, complete cds	--	--	--	--	Q70PR7	221	9.8e-17	Vinorine synthase OS=Rauvolfia serpentina OX=4060 GN=ACT PE=1 SV=2	PF02671//PF02458//PF02285	Paired amphipathic helix repeat//Transferase family//Cytochrome oxidase c subunit VIII	GO:0006123//GO:0006355//GO:0015992	mitochondrial electron transport, cytochrome c to oxygen//regulation of transcription, DNA-templated//proton transport	GO:0016747//GO:0004129	transferase activity, transferring acyl groups other than amino-acyl groups//cytochrome-c oxidase activity	GO:0045277	respiratory chain complex IV	--	--	DOWN	-10.23	2.1128e-16	blast,frame:2 start:485 end:838|blast,frame:1 start:778 end:1155	Category 2
Cluster-6671.5294	41	37	47	128	148	113	1.72	1.41	1.67	3.56	3.92	3.44	1762	--	--	--	--	--	XM_008244022.2	XM_008244022	878	0	PREDICTED: Prunus mume serine/threonine-protein kinase At5g01020 (LOC103340591), mRNA	--	--	--	--	Q9ZUF4	1400	2.2e-153	Serine/threonine-protein kinase RIPK OS=Arabidopsis thaliana OX=3702 GN=RIPK PE=1 SV=1	PF07714//PF00069	Protein tyrosine kinase//Protein kinase domain	GO:0006468	protein phosphorylation	GO:0005524//GO:0004672	ATP binding//protein kinase activity	--	--	--	--	DOWN	-1.2667	3.6318e-06	blast,frame:-3 start:1628 end:156	Category 2
Cluster-6671.5308	14	24	12	342.97	386	325	0.63	0.98	0.46	10.24	10.95	10.6	1661	9098807	XP_021834447.1	1021	4e-108	uncharacterized protein LOC110774212 [Prunus avium]	XM_016793033.1	XM_016793033	510	0	PREDICTED: Prunus mume uncharacterized LOC107880779 (LOC107880779), mRNA	--	--	--	--	--	--	--	--	PF02902	Ulp1 protease family, C-terminal catalytic domain	GO:0006508	proteolysis	GO:0008234	cysteine-type peptidase activity	--	--	--	--	DOWN	-4.0274	1.0907e-51	estscan,start:759 end:1553	Category 2
Cluster-6671.685	137	221	194	421	556	462	2.87	4.22	3.44	5.88	7.39	7.04	3244	3490199	XP_008246416.1	4627	0	PREDICTED: respiratory burst oxidase homolog protein B [Prunus mume]	XM_008248194.1	XM_008248194	1987	0	PREDICTED: Prunus mume respiratory burst oxidase homolog protein B (LOC103344591), mRNA	K13447	RBOH	respiratory burst oxidase	http://www.genome.jp/dbget-bin/www_bget?ko:K13447	Q948T9	3545	0	Respiratory burst oxidase homolog protein B OS=Solanum tuberosum OX=4113 GN=RBOHB PE=1 SV=1	PF13405//PF08414//PF00033//PF13833//PF13499//PF00036//PF08030//PF13202//PF08022	EF-hand domain//Respiratory burst NADPH oxidase//Cytochrome b/b6/petB//EF-hand domain pair//EF-hand domain pair//EF hand//Ferric reductase NAD binding domain//EF hand//FAD-binding domain	GO:0006979//GO:0022904//GO:0006804//GO:0055114	response to oxidative stress//respiratory electron transport chain//obsolete peroxidase reaction//oxidation-reduction process	GO:0005509//GO:0016491//GO:0050664//GO:0004601	calcium ion binding//oxidoreductase activity//oxidoreductase activity, acting on NAD(P)H, oxygen as acceptor//peroxidase activity	GO:0016020	membrane	--	--	DOWN	-1.0176	6.4681e-10	estscan,start:2972 end:210; minus strand	Category 2
Cluster-6671.7356	0	0	0	31	22	16	0	0	0	6.6	4.41	3.75	458	--	--	--	--	--	XM_008247675.2	XM_008247675	366	0	PREDICTED: Prunus mume uncharacterized LOC103344046 (LOC103344046), partial mRNA	--	--	--	--	--	--	--	--	PF07074//PF08496//PF11744//PF01080	Translocon-associated protein, gamma subunit (TRAP-gamma)//Peptidase family S49 N-terminal//Aluminium activated malate transporter//Presenilin	GO:0015743//GO:0006613	malate transport//cotranslational protein targeting to membrane	GO:0004252//GO:0004190	serine-type endopeptidase activity//aspartic-type endopeptidase activity	GO:0030176//GO:0016021//GO:0005886//GO:0005784	integral component of endoplasmic reticulum membrane//integral component of membrane//plasma membrane//Sec61 translocon complex	--	--	DOWN	-6.5949	6.2962e-06	estscan,start:458 end:1; minus strand	Category 2
Cluster-6671.7370	376	397	426	1172	1072	976	6.81	6.57	6.55	14.19	12.35	12.89	3702	7880883	ONI31467.1	2187	5.6e-243	hypothetical protein PRUPE_1G314900 [Prunus persica]	XM_007225083.1	XM_007225083	1271	0	Prunus persica hypothetical protein (PRUPE_ppa002452mg) mRNA, complete cds	--	--	--	--	Q9M9C5	1272	3.2e-138	Probable leucine-rich repeat receptor-like protein kinase At1g68400 OS=Arabidopsis thaliana OX=3702 GN=At1g68400 PE=2 SV=1	PF13855//PF00560//PF00069//PF07714	Leucine rich repeat//Leucine Rich Repeat//Protein kinase domain//Protein tyrosine kinase	GO:0006468	protein phosphorylation	GO:0005515//GO:0005524//GO:0004672	protein binding//ATP binding//protein kinase activity	--	--	--	--	DOWN	-1.0593	2.5345e-22	blast,frame:1 start:1 end:1437	Category 2
Cluster-6671.7612	64	67.85	93.76	168	232.02	185	1.52	1.47	1.89	2.67	3.5	3.21	2886	--	--	--	--	--	XM_007200803.1	XM_007200803	1419	0	Prunus persica hypothetical protein (PRUPE_ppa1027153mg) mRNA, complete cds	--	--	--	--	Q8VZG8	1188	1.4e-128	MDIS1-interacting receptor like kinase 2 OS=Arabidopsis thaliana OX=3702 GN=MIK2 PE=1 SV=3	PF07714//PF13855//PF00069//PF00560	Protein tyrosine kinase//Leucine rich repeat//Protein kinase domain//Leucine Rich Repeat	GO:0006468	protein phosphorylation	GO:0005524//GO:0004672//GO:0005515	ATP binding//protein kinase activity//protein binding	--	--	--	--	DOWN	-1.007	1.0129e-05	estscan,start:1 end:2304	Category 2
Cluster-6671.7688	610	675	712	404	384	359	18.52	18.66	18.31	8.16	7.38	7.92	2326	--	--	--	--	--	XM_007205744.1	XM_007205744	869	0	Prunus persica hypothetical protein (PRUPE_ppa010707mg) mRNA, complete cds	K08597	SENP8, NEDP1, DEN1	sentrin-specific protease 8	http://www.genome.jp/dbget-bin/www_bget?ko:K08597	Q9LSS7	589	3.2e-59	NEDD8-specific protease 1 OS=Arabidopsis thaliana OX=3702 GN=NEDP1 PE=2 SV=1	PF00770//PF02902	Adenovirus endoprotease//Ulp1 protease family, C-terminal catalytic domain	GO:0006508	proteolysis	GO:0008234//GO:0004197	cysteine-type peptidase activity//cysteine-type endopeptidase activity	--	--	KOG3246	Sentrin-specific cysteine protease (Ulp1 family)	UP	1.1651	8.6122e-26	blast,frame:1 start:1309 end:2025	Category 2
Cluster-6671.8407	3	1	1	67	64	45	0.28	0.08	0.08	4.06	3.67	2.98	956	8269364	XP_020419963.1	298	1.6e-24	uncharacterized protein LOC109949245 [Prunus persica]	XM_016792181.1	XM_016792181	223	5.99789e-111	PREDICTED: Prunus mume uncharacterized LOC103320005 (LOC103320005), transcript variant X2, mRNA	K19027	ZFYVE26	zinc finger FYVE domain-containing protein 26	http://www.genome.jp/dbget-bin/www_bget?ko:K19027	Q9SXB8	179	4.6e-12	G-type lectin S-receptor-like serine/threonine-protein kinase At1g11330 OS=Arabidopsis thaliana OX=3702 GN=At1g11330 PE=1 SV=3	PF00069//PF07714	Protein kinase domain//Protein tyrosine kinase	GO:0006468	protein phosphorylation	GO:0005524//GO:0004672	ATP binding//protein kinase activity	--	--	--	--	DOWN	-4.7589	2.4362e-09	blast,frame:-2 start:955 end:821|blast,frame:-3 start:927 end:640|blast,frame:-1 start:791 end:243	Category 2
Cluster-6671.8948	33.43	37.88	30	210	172.08	113	3.1	3.14	2.33	12.66	9.84	7.45	959	--	--	--	--	--	XM_008221419.2	XM_008221419	702	0	PREDICTED: Prunus mume LEAF RUST 10 DISEASE-RESISTANCE LOCUS RECEPTOR-LIKE PROTEIN KINASE-like 2.5 (LOC103319825), mRNA	--	--	--	--	F4HQ20	846	2.1e-89	LEAF RUST 10 DISEASE-RESISTANCE LOCUS RECEPTOR-LIKE PROTEIN KINASE-like 2.5 OS=Arabidopsis thaliana OX=3702 GN=LRK10L-2.5 PE=3 SV=1	PF00069//PF07714	Protein kinase domain//Protein tyrosine kinase	GO:0006468	protein phosphorylation	GO:0005524//GO:0004672	ATP binding//protein kinase activity	--	--	--	--	DOWN	-1.9164	8.6519e-11	blast,frame:1 start:1 end:852	Category 2
Cluster-6671.8954	193	147	156.1	1402	1818.01	1492	3.76	2.61	2.58	18.23	22.49	21.17	3465	10955680	XP_024159261.1	3005	0	dynamin-related protein 5A isoform X2 [Rosa chinensis]	XM_016792993.1	XM_016792993	2267	0	PREDICTED: Prunus mume dynamin-related protein 5A (LOC103326198), transcript variant X1, mRNA	--	--	--	--	F4HPR5	2560	1.3e-287	Dynamin-related protein 5A OS=Arabidopsis thaliana OX=3702 GN=DRP5A PE=2 SV=1	PF04548//PF07821//PF01031//PF01926	AIG1 family//Alpha-amylase C-terminal beta-sheet domain//Dynamin central region//50S ribosome-binding GTPase	GO:0005975//GO:0005985//GO:0005982	carbohydrate metabolic process//sucrose metabolic process//starch metabolic process	GO:0005509//GO:0005525//GO:0004556	calcium ion binding//GTP binding//alpha-amylase activity	--	--	KOG0446	Vacuolar sorting protein VPS1, dynamin, and related proteins	DOWN	-2.869	1.1038e-105	blast,frame:-2 start:719 end:510|blast,frame:-1 start:3006 end:646	Category 2
Cluster-6671.9640	137	150	153.01	920.42	1388.17	1196.85	1.35	1.36	1.28	6.09	8.74	8.64	6549	6789016	XP_017179074.1	5213	0	PREDICTED: LOW QUALITY PROTEIN: uncharacterized protein LOC103404019 [Malus domestica]	FM253563.1	FM253563	2114	0	Prunus cerasifera BAC insert containing Ma gene, resistant Ma1 allele, clone 76H19	--	--	--	--	Q7LHG5	871	1.8e-91	Transposon Ty3-I Gag-Pol polyprotein OS=Saccharomyces cerevisiae (strain ATCC 204508 / S288c) OX=559292 GN=TY3B-I PE=3 SV=2	PF02411//PF13895//PF12581//PF00665	MerT mercuric transport protein//Immunoglobulin domain//Protein of unknown function (DUF3756)//Integrase core domain	GO:0015074//GO:0006144//GO:0006508//GO:0015694	DNA integration//purine nucleobase metabolic process//proteolysis//mercury ion transport	GO:0070008//GO:0005515//GO:0004197//GO:0015097//GO:0003968//GO:0016817//GO:0004252	serine-type exopeptidase activity//protein binding//cysteine-type endopeptidase activity//mercury ion transmembrane transporter activity//RNA-directed RNA polymerase activity//hydrolase activity, acting on acid anhydrides//serine-type endopeptidase activity	GO:0016020//GO:0031379	membrane//RNA-directed RNA polymerase complex	--	--	DOWN	-2.6235	6.0907e-75	blast,frame:1 start:2389 end:6153	Category 2
Cluster-6671.9794	72	66.93	80.91	94.01	338.47	292.28	3.94	3.31	3.73	3.39	11.6	11.52	1421	9073339	XP_021806144.1	1760	7e-194	putative disease resistance RPP13-like protein 1 [Prunus avium]	XM_016797012.1	XM_016797012	984	0	PREDICTED: Prunus mume putative disease resistance RPP13-like protein 1 (LOC103343307), mRNA	--	--	--	--	Q9LRR4	721	9.6e-75	Putative disease resistance RPP13-like protein 1 OS=Arabidopsis thaliana OX=3702 GN=RPPL1 PE=3 SV=1	PF00158//PF06743//PF00931//PF05496//PF08477//PF00005	Sigma-54 interaction domain//FAST kinase-like protein, subdomain 1//NB-ARC domain//Holliday junction DNA helicase ruvB N-terminus//Ras of Complex, Roc, domain of DAPkinase//ABC transporter	GO:0006281//GO:0006355//GO:0006310//GO:0007264	DNA repair//regulation of transcription, DNA-templated//DNA recombination//small GTPase mediated signal transduction	GO:0008134//GO:0005525//GO:0004672//GO:0016887//GO:0009378//GO:0043531//GO:0005524	transcription factor binding//GTP binding//protein kinase activity//ATPase activity//four-way junction helicase activity//ADP binding//ATP binding	GO:0005667//GO:0009379//GO:0005657	transcription factor complex//Holliday junction helicase complex//replication fork	--	--	DOWN	-1.3437	0.038727	estscan,start:1 end:1421	Category 2
Cluster-7050.0	90	92	119	67	65	42	11.06	10.03	12.15	5.29	4.86	3.63	795	3501501	XP_008233918.1	694	1.6e-70	PREDICTED: probable calcium-binding protein CML29 [Prunus mume]	XM_008235696.1	XM_008235696	618	0	PREDICTED: Prunus mume probable calcium-binding protein CML29 (LOC103332931), mRNA	--	--	--	--	Q5Z676	244	1.1e-19	Probable calcium-binding protein CML29 OS=Oryza sativa subsp. japonica OX=39947 GN=CML29 PE=2 SV=1	PF00404//PF00036//PF13833//PF13202//PF13405//PF10591//PF12763//PF13499	Dockerin type I repeat//EF hand//EF-hand domain pair//EF hand//EF-hand domain//Secreted protein acidic and rich in cysteine Ca binding region//Cytoskeletal-regulatory complex EF hand//EF-hand domain pair	GO:0005975//GO:0007165	carbohydrate metabolic process//signal transduction	GO:0005515//GO:0004553//GO:0005509	protein binding//hydrolase activity, hydrolyzing O-glycosyl compounds//calcium ion binding	GO:0005578	proteinaceous extracellular matrix	KOG0027	Calmodulin and related proteins (EF-Hand superfamily)	UP	1.159	3.2663e-05	blast,frame:-1 start:702 end:124	Category 2
Cluster-7690.0	14	36	8	242	219	194	0.61	1.43	0.3	7.01	6.02	6.13	1705	8257135	XP_007221864.2	1938	1.9e-214	uncharacterized protein LOC18789479 [Prunus persica]	XM_008245523.2	XM_008245523	1486	0	PREDICTED: Prunus mume uncharacterized LOC103341972 (LOC103341972), mRNA	--	--	--	--	--	--	--	--	PF05365//PF05431	Ubiquinol-cytochrome C reductase, UQCRX/QCR9 like//Insecticidal Crystal Toxin, P42	GO:0009405//GO:0006122	pathogenesis//mitochondrial electron transport, ubiquinol to cytochrome c	--	--	GO:0005750//GO:0005743	mitochondrial respiratory chain complex III//mitochondrial inner membrane	--	--	DOWN	-3.1202	7.4093e-07	estscan,start:1492 end:80; minus strand	Category 2
Cluster-8642.0	4	5.91	2	101	110.99	75.02	0.16	0.22	0.07	2.72	2.84	2.21	1811	7869305	ONI19889.1	1349	4e-146	hypothetical protein PRUPE_3G303500 [Prunus persica]	XM_007217358.1	XM_007217358	475	0	Prunus persica hypothetical protein (PRUPE_ppa026411mg) mRNA, complete cds	--	--	--	--	Q9SD53	377	9.5e-35	UPF0481 protein At3g47200 OS=Arabidopsis thaliana OX=3702 GN=At3g47200 PE=2 SV=1	PF10440	Ubiquitin-binding WIYLD domain	GO:0006479//GO:0006554	protein methylation//lysine catabolic process	GO:0018024	histone-lysine N-methyltransferase activity	--	--	--	--	DOWN	-4.2019	4.6698e-15	blast,frame:2 start:83 end:1546	Category 2
Cluster-8915.0	40	30	28	149	134	129	2.21	1.5	1.3	5.42	4.63	5.13	1412	3496578	XP_008226949.1	2155	1.1e-239	PREDICTED: mitogen-activated protein kinase kinase kinase NPK1-like [Prunus mume]	XM_008228727.2	XM_008228727	1352	0	PREDICTED: Prunus mume mitogen-activated protein kinase kinase kinase NPK1-like (LOC103326494), mRNA	--	--	--	--	O80888	690	3.8e-71	Mitogen-activated protein kinase kinase kinase 17 OS=Arabidopsis thaliana OX=3702 GN=MAPKKK17 PE=1 SV=1	PF06293//PF00069//PF07714//PF16588//PF06689	Lipopolysaccharide kinase (Kdo/WaaP) family//Protein kinase domain//Protein tyrosine kinase//C2H2 zinc-finger//ClpX C4-type zinc finger	GO:0006468	protein phosphorylation	GO:0004672//GO:0008270//GO:0003676//GO:0016773//GO:0005524//GO:0046983	protein kinase activity//zinc ion binding//nucleic acid binding//phosphotransferase activity, alcohol group as acceptor//ATP binding//protein dimerization activity	GO:0016020	membrane	--	--	DOWN	-1.6972	5.3272e-09	estscan,start:39 end:1223	Category 2
Cluster-9064.0	60	66	62	211	267	235	1.41	1.42	1.24	3.31	3.99	4.03	2916	3508017	XP_008242934.1	2680	3e-300	PREDICTED: G-type lectin S-receptor-like serine..threonine-protein kinase At1g11410 [Prunus mume]	XM_008244712.2	XM_008244712	1656	0	PREDICTED: Prunus mume G-type lectin S-receptor-like serine/threonine-protein kinase At1g11410 (LOC103341228), mRNA	--	--	--	--	O81862	776	8.3e-81	Class V chitinase OS=Arabidopsis thaliana OX=3702 GN=ChiC PE=1 SV=1	PF00704//PF07714//PF00325//PF00069//PF07718	Glycosyl hydrolases family 18//Protein tyrosine kinase//Bacterial regulatory proteins, crp family//Protein kinase domain//Coatomer beta C-terminal region	GO:0006355//GO:0016192//GO:0006886//GO:0005975//GO:0006468	regulation of transcription, DNA-templated//vesicle-mediated transport//intracellular protein transport//carbohydrate metabolic process//protein phosphorylation	GO:0004553//GO:0004672//GO:0003677//GO:0005198//GO:0005524	hydrolase activity, hydrolyzing O-glycosyl compounds//protein kinase activity//DNA binding//structural molecule activity//ATP binding	GO:0030126	COPI vesicle coat	--	--	DOWN	-1.553	1.2215e-13	blast,frame:1 start:67 end:1764|blast,frame:2 start:2024 end:2725	Category 2
Cluster-9155.0	52	62	65	224	263	185	2.11	2.28	2.23	6.02	6.72	5.43	1816	3494495	XP_008224031.1	1048	3.2e-111	PREDICTED: uncharacterized protein LOC103323795 [Prunus mume]	XM_008225809.1	XM_008225809	607	0	PREDICTED: Prunus mume uncharacterized LOC103323795 (LOC103323795), mRNA	--	--	--	--	--	--	--	--	PF13833//PF13499//PF13405//PF00036	EF-hand domain pair//EF-hand domain pair//EF-hand domain//EF hand	--	--	GO:0005509	calcium ion binding	--	--	--	--	DOWN	-1.5371	1.237e-12	blast,frame:-1 start:1717 end:947|blast,frame:-3 start:437 end:312	Category 2
Cluster-9705.0	53	87	70	258	306	287.01	3.31	4.91	3.68	10.6	11.94	12.88	1281	3175349	EXB67431.1	1351	1.7e-146	putative serine..threonine-protein kinase WNK11 [Morus notabilis]	XM_008228881.2	XM_008228881	996	0	PREDICTED: Prunus mume probable serine/threonine-protein kinase WNK11 (LOC103326634), mRNA	K08867	WNK, PRKWNK	WNK lysine deficient protein kinase	http://www.genome.jp/dbget-bin/www_bget?ko:K08867	Q6ICW6	1274	6.5e-139	Probable serine/threonine-protein kinase WNK11 OS=Arabidopsis thaliana OX=3702 GN=WNK11 PE=2 SV=1	PF00069//PF04265//PF07714//PF03739	Protein kinase domain//Thiamin pyrophosphokinase, vitamin B1 binding domain//Protein tyrosine kinase//Predicted permease YjgP/YjgQ family	GO:0009229//GO:0006468	thiamine diphosphate biosynthetic process//protein phosphorylation	GO:0005524//GO:0030975//GO:0004672	ATP binding//thiamine binding//protein kinase activity	GO:0016021	integral component of membrane	--	--	DOWN	-1.6555	6.2224e-16	blast,frame:-3 start:1279 end:242	Category 2
Cluster-9760.0	12	17	20	80	105	94	0.53	0.68	0.74	2.32	2.9	2.98	1700	9099407	XP_021800103.1	1523	2.5e-166	putative UPF0481 protein At3g02645 [Prunus avium]	XM_016794190.1	XM_016794190	679	0	PREDICTED: Prunus mume UPF0481 protein At3g47200-like (LOC107881106), mRNA	--	--	--	--	Q9SD53	431	4.9e-41	UPF0481 protein At3g47200 OS=Arabidopsis thaliana OX=3702 GN=At3g47200 PE=2 SV=1	PF00081	Iron/manganese superoxide dismutases, alpha-hairpin domain	GO:0055114//GO:0006801	oxidation-reduction process//superoxide metabolic process	GO:0046872//GO:0004784	metal ion binding//superoxide dismutase activity	--	--	--	--	DOWN	-2.1478	4.04e-09	blast,frame:-3 start:1698 end:208	Category 2
Cluster-6671.13481	3563	3385.16	4183	2037	1847	1796	119.47	103.25	118.74	45.4	39.14	43.69	2134	3497194	XP_008227834.1	2204	3.4e-245	PREDICTED: aspartic proteinase nepenthesin-1 [Prunus mume]	XM_008229612.1	XM_008229612	1847	0	PREDICTED: Prunus mume aspartic proteinase nepenthesin-1 (LOC103327300), mRNA	--	--	--	--	Q766C3	969	2.5e-103	Aspartic proteinase nepenthesin-1 OS=Nepenthes gracilis OX=150966 GN=nep1 PE=1 SV=1	PF00026	Eukaryotic aspartyl protease	GO:0006508	proteolysis	GO:0004190	aspartic-type endopeptidase activity	--	--	--	--	UP	1.3338	2.8144e-53	blast,frame:3 start:351 end:1766	Category 3
Cluster-6671.14273	6513	7424.03	7272	3170	2897.46	2591	78.84	82.25	74.86	25.72	22.37	22.93	5391	8274943	XP_007203658.2	1672	4.2e-183	histone-lysine N-methyltransferase SUVR3 [Prunus persica]	XM_008245912.2	XM_008245912	1675	0	PREDICTED: Prunus mume histone-lysine N-methyltransferase SUVR3 (LOC103342301), mRNA	K11433	SETMAR	histone-lysine N-methyltransferase SETMAR	http://www.genome.jp/dbget-bin/www_bget?ko:K11433	Q9SRV2	924	1.1e-97	Histone-lysine N-methyltransferase SUVR3 OS=Arabidopsis thaliana OX=3702 GN=SUVR3 PE=2 SV=4	PF05204//PF00856//PF00646//PF03153//PF12937//PF05033	Homing endonuclease//SET domain//F-box domain//Transcription factor IIA, alpha/beta subunit//F-box-like//Pre-SET motif	GO:0034968//GO:0030908//GO:0006554//GO:0006479//GO:0006367	histone lysine methylation//protein splicing//lysine catabolic process//protein methylation//transcription initiation from RNA polymerase II promoter	GO:0005515//GO:0008270//GO:0004519//GO:0018024//GO:0003677	protein binding//zinc ion binding//endonuclease activity//histone-lysine N-methyltransferase activity//DNA binding	GO:0005672//GO:0005634	transcription factor TFIIA complex//nucleus	--	--	UP	1.6596	9.9862e-100	blast,frame:-2 start:5159 end:4083	Category 3
Cluster-6671.1994	425	503	461	186	179	170	67.28	70.01	60.25	18.7	17.03	18.73	681	7883046	ONI33630.1	468	2.2e-44	hypothetical protein PRUPE_1G436900 [Prunus persica]	XM_007225996.1	XM_007225996	527	0	Prunus persica hypothetical protein (PRUPE_ppa013983mg) mRNA, complete cds	--	--	--	--	--	--	--	--	PF13405//PF13202//PF00036//PF13833//PF10591//PF13499	EF-hand domain//EF hand//EF hand//EF-hand domain pair//Secreted protein acidic and rich in cysteine Ca binding region//EF-hand domain pair	GO:0007165	signal transduction	GO:0005509	calcium ion binding	GO:0005578	proteinaceous extracellular matrix	--	--	UP	1.7437	4.9905e-36	blast,frame:-2 start:647 end:360	Category 3
Cluster-6671.20018	16	35	13.09	180	214.99	196.2	0.53	1.05	0.36	3.93	4.47	4.68	2171	3509869	XP_008245767.1	1771	5.6e-195	PREDICTED: rust resistance kinase Lr10-like [Prunus mume]	XM_008247533.2	XM_008247533	1086	0	PREDICTED: Prunus mume rust resistance kinase Lr10-like (LOC103343892), partial mRNA	--	--	--	--	P93604	987	2.1e-105	Rust resistance kinase Lr10 OS=Triticum aestivum OX=4565 GN=LRK10 PE=2 SV=1	PF00069//PF13947//PF07714	Protein kinase domain//Wall-associated receptor kinase galacturonan-binding//Protein tyrosine kinase	GO:0006468	protein phosphorylation	GO:0005524//GO:0004672//GO:0030247	ATP binding//protein kinase activity//polysaccharide binding	--	--	--	--	DOWN	-2.8365	1.2529e-20	blast,frame:2 start:938 end:2008	Category 3
Cluster-6671.20799	2532	2622.01	3102	340	446.23	365	63.19	59.67	65.66	5.66	7.06	6.63	2766	3495175	XP_008224954.1	2623	1.2e-293	PREDICTED: external alternative NAD..P..H-ubiquinone oxidoreductase B3, mitochondrial [Prunus mume]	XM_008226732.2	XM_008226732	1665	0	PREDICTED: Prunus mume external alternative NAD(P)H-ubiquinone oxidoreductase B3, mitochondrial (LOC103324645), mRNA	K17871	ndh1	NADH:ubiquinone reductase (non-electrogenic)	http://www.genome.jp/dbget-bin/www_bget?ko:K17871	F4JJJ3	1881	5.8e-209	External alternative NAD(P)H-ubiquinone oxidoreductase B3, mitochondrial OS=Arabidopsis thaliana OX=3702 GN=NDB3 PE=2 SV=1	PF07992//PF13241//PF00036//PF13202//PF13833//PF13405//PF13499//PF01266//PF00070//PF03047	Pyridine nucleotide-disulphide oxidoreductase//Putative NAD(P)-binding//EF hand//EF hand//EF-hand domain pair//EF-hand domain//EF-hand domain pair//FAD dependent oxidoreductase//Pyridine nucleotide-disulphide oxidoreductase//COMC family	GO:0019354//GO:0055114//GO:0006779//GO:0007165	siroheme biosynthetic process//oxidation-reduction process//porphyrin-containing compound biosynthetic process//signal transduction	GO:0005186//GO:0043115//GO:0016491//GO:0005509	pheromone activity//precorrin-2 dehydrogenase activity//oxidoreductase activity//calcium ion binding	--	--	KOG2495	NADH-dehydrogenase (ubiquinone)	UP	3.2102	2.1159e-277	blast,frame:-1 start:2415 end:841	Category 3
Cluster-6671.3884	2145	2742.51	2543.05	446	478	417.02	54.04	63	54.33	7.49	7.64	7.64	2743	8259611	XP_007226296.2	2202	7.5e-245	aspartic proteinase nepenthesin-1 [Prunus persica]	XM_007226234.1	XM_007226234	1237	0	Prunus persica hypothetical protein (PRUPE_ppa020423mg) mRNA, partial cds	--	--	--	--	Q766C3	596	5.8e-60	Aspartic proteinase nepenthesin-1 OS=Nepenthes gracilis OX=150966 GN=nep1 PE=1 SV=1	PF00026//PF01284	Eukaryotic aspartyl protease//Membrane-associating domain	GO:0006508	proteolysis	GO:0004190	aspartic-type endopeptidase activity	GO:0016020	membrane	--	--	UP	2.8368	5.6121e-210	blast,frame:-1 start:2692 end:1334	Category 3
Cluster-6671.4285	6642.01	7829.96	7819	1447	1445.99	1257	63.1	68.14	63.21	9.22	8.77	8.74	6788	--	--	--	--	--	XM_008248079.2	XM_008248079	4225	0	PREDICTED: Prunus mume pleiotropic drug resistance protein 3-like (LOC103344496), mRNA	--	--	--	--	Q5W274	5038	0	Pleiotropic drug resistance protein 3 OS=Nicotiana tabacum OX=4097 GN=PDR3 PE=2 SV=1	PF02421//PF03193//PF02367//PF00910//PF03266//PF01637//PF07728//PF00438//PF06422//PF05496//PF00005//PF00985//PF02772//PF01443//PF13304//PF01061//PF02773//PF01926//PF10662//PF01333//PF00004	Ferrous iron transport protein B//Protein of unknown function, DUF258//Threonylcarbamoyl adenosine biosynthesis protein TsaE//RNA helicase//NTPase//Archaeal ATPase//AAA domain (dynein-related subfamily)//S-adenosylmethionine synthetase, N-terminal domain//CDR ABC transporter//Holliday junction DNA helicase ruvB N-terminus//ABC transporter//Merozoite Surface Antigen 2 (MSA-2) family//S-adenosylmet…	GO:0006556//GO:0007155//GO:0015979//GO:0006118//GO:0002949//GO:0015684//GO:0006576//GO:0006810//GO:0006555//GO:0006281//GO:0006310	S-adenosylmethionine biosynthetic process//cell adhesion//photosynthesis//obsolete electron transport//tRNA threonylcarbamoyladenosine modification//ferrous iron transport//cellular biogenic amine metabolic process//transport//methionine metabolic process//DNA repair//DNA recombination	GO:0005506//GO:0003724//GO:0009378//GO:0098519//GO:0005525//GO:0009055//GO:0003723//GO:0003924//GO:0042626//GO:0015093//GO:0005524//GO:0004478//GO:0020037//GO:0016887	iron ion binding//RNA helicase activity//four-way junction helicase activity//nucleotide phosphatase activity, acting on free nucleotides//GTP binding//electron carrier activity//RNA binding//GTPase activity//ATPase activity, coupled to transmembrane movement of substances//ferrous iron transmembrane transporter activity//ATP binding//methionine adenosyltransferase activity//heme binding//ATPase …	GO:0016020//GO:0009379//GO:0031361//GO:0016021//GO:0005657	membrane//Holliday junction helicase complex//integral component of thylakoid membrane//integral component of membrane//replication fork	--	--	UP	2.7918	0	blast,frame:-1 start:6410 end:2061	Category 3
Cluster-6671.6663	1160.75	1322	1493	507.55	541	429	38.13	39.51	41.53	11.09	11.23	10.23	2172	8271836	XP_020422240.1	402	3.1e-36	heavy metal-associated isoprenylated plant protein 6 [Prunus persica]	XM_008245774.2	XM_008245774	819	0	PREDICTED: Prunus mume heavy metal-associated isoprenylated plant protein 3 (LOC103342175), mRNA	--	--	--	--	Q9FJH5	274	1e-22	Heavy metal-associated isoprenylated plant protein 3 OS=Arabidopsis thaliana OX=3702 GN=HIPP03 PE=1 SV=1	PF00403//PF06459//PF15724	Heavy-metal-associated domain//Ryanodine Receptor TM 4-6//TMEM119 family	GO:0006874//GO:0030001//GO:0006816//GO:0001503	cellular calcium ion homeostasis//metal ion transport//calcium ion transport//ossification	GO:0046872//GO:0005219	metal ion binding//ryanodine-sensitive calcium-release channel activity	GO:0016021//GO:0005622	integral component of membrane//intracellular	--	--	UP	1.7936	3.7986e-81	blast,frame:-1 start:1047 end:418|blast,frame:-3 start:2050 end:1565	Category 3
Cluster-6671.7532	7504	9178	8686	1380	1197	1129	238.76	265.77	234.05	29.2	24.09	26.08	2233	--	--	--	--	--	XM_008244968.2	XM_008244968	1858	0	PREDICTED: Prunus mume protein ASPARTIC PROTEASE IN GUARD CELL 1 (LOC103341448), mRNA	--	--	--	--	Q9LS40	1146	7.9e-124	Protein ASPARTIC PROTEASE IN GUARD CELL 1 OS=Arabidopsis thaliana OX=3702 GN=ASPG1 PE=1 SV=1	PF00026	Eukaryotic aspartyl protease	GO:0006508	proteolysis	GO:0004190	aspartic-type endopeptidase activity	--	--	--	--	UP	3.1393	1.127e-289	blast,frame:2 start:2 end:1843	Category 3
Cluster-6671.7591	4229	4340	5005	2691	2608.02	2267	134.49	125.61	134.8	56.92	52.45	52.34	2234	3503477	XP_008236565.1	2492	1.4e-278	PREDICTED: cysteine proteinase RD21a-like [Prunus mume]	XM_008238343.1	XM_008238343	1889	0	PREDICTED: Prunus mume cysteine proteinase RD21a-like (LOC103335333), mRNA	--	--	--	--	P43297	1698	7.8e-188	Cysteine proteinase RD21A OS=Arabidopsis thaliana OX=3702 GN=RD21A PE=1 SV=1	PF03051//PF00112//PF02382	Peptidase C1-like family//Papain family cysteine protease//RTX N-terminal domain	GO:0009405//GO:0006508	pathogenesis//proteolysis	GO:0004197//GO:0005509//GO:0008234	cysteine-type endopeptidase activity//calcium ion binding//cysteine-type peptidase activity	GO:0005576	extracellular region	--	--	UP	1.2094	5.0483e-61	blast,frame:-3 start:1827 end:343	Category 3
Cluster-6671.7599	2395	2543	2629.43	1543	1508	1508.94	58.08	56.25	54.09	24.96	23.2	26.64	2838	7861097	ONI11681.1	718	9.3e-73	hypothetical protein PRUPE_4G120400 [Prunus persica]	XM_008227718.1	XM_008227718	750	0	PREDICTED: Prunus mume probable GMP synthase [glutamine-hydrolyzing] (LOC103325537), mRNA	K01246	tag	DNA-3-methyladenine glycosylase I	http://www.genome.jp/dbget-bin/www_bget?ko:K01246	Q7VG78	210	3.5e-15	Probable GMP synthase [glutamine-hydrolyzing] OS=Helicobacter hepaticus (strain ATCC 51449 / 3B1) OX=235279 GN=guaA PE=3 SV=1	PF03352//PF11883	Methyladenine glycosylase//Domain of unknown function (DUF3403)	GO:0009069//GO:0006284//GO:0016310	serine family amino acid metabolic process//base-excision repair//phosphorylation	GO:0008725//GO:0004674	DNA-3-methyladenine glycosylase activity//protein serine/threonine kinase activity	--	--	--	--	UP	1.0959	5.5378e-43	blast,frame:-1 start:2439 end:1663|blast,frame:-3 start:1702 end:1562|blast,frame:-2 start:1319 end:1125	Category 3
Cluster-6671.8139	1716	1831	1960	962	972	861	70.48	68.26	68.05	26.19	25.15	25.59	1796	3504837	XP_008238561.1	1751	9.7e-193	PREDICTED: L-lactate dehydrogenase B-like [Prunus mume]	XM_008240339.1	XM_008240339	1445	0	PREDICTED: Prunus mume L-lactate dehydrogenase B-like (LOC103337187), mRNA	K00016	LDH, ldh	L-lactate dehydrogenase	http://www.genome.jp/dbget-bin/www_bget?ko:K00016	P22988	1169	1.4e-126	L-lactate dehydrogenase A OS=Hordeum vulgare OX=4513 PE=1 SV=1	PF01210//PF02254//PF00070//PF07992//PF00056//PF03435//PF02056//PF02737//PF02866	NAD-dependent glycerol-3-phosphate dehydrogenase N-terminus//TrkA-N domain//Pyridine nucleotide-disulphide oxidoreductase//Pyridine nucleotide-disulphide oxidoreductase//lactate/malate dehydrogenase, NAD binding domain//Saccharopine dehydrogenase NADP binding domain//Family 4 glycosyl hydrolase//3-hydroxyacyl-CoA dehydrogenase, NAD binding domain//lactate/malate dehydrogenase, alpha/beta C-termin…	GO:0006568//GO:0018874//GO:0006631//GO:0006554//GO:0006552//GO:0005975//GO:0006633//GO:0006813//GO:0055114//GO:0006550//GO:0006574//GO:0046168	tryptophan metabolic process//benzoate metabolic process//fatty acid metabolic process//lysine catabolic process//leucine catabolic process//carbohydrate metabolic process//fatty acid biosynthetic process//potassium ion transport//oxidation-reduction process//isoleucine catabolic process//valine catabolic process//glycerol-3-phosphate catabolic process	GO:0051287//GO:0004553//GO:0016616//GO:0016491//GO:0003857	NAD binding//hydrolase activity, hydrolyzing O-glycosyl compounds//oxidoreductase activity, acting on the CH-OH group of donors, NAD or NADP as acceptor//oxidoreductase activity//3-hydroxyacyl-CoA dehydrogenase activity	--	--	KOG1495	Lactate dehydrogenase	UP	1.3456	9.7172e-65	blast,frame:2 start:389 end:1453	Category 3
Cluster-6671.9052	6507.92	6659.27	7727.04	4023	4512	4003	179.65	167.5	180.8	73.98	78.91	80.34	2529	7849289	ONH99872.1	2951	0	hypothetical protein PRUPE_6G054800 [Prunus persica]	XM_008222976.2	XM_008222976	1111	0	PREDICTED: Prunus mume asparagine synthetase [glutamine-hydrolyzing] (LOC103321188), mRNA	K01953	asnB, ASNS	asparagine synthase (glutamine-hydrolysing)	http://www.genome.jp/dbget-bin/www_bget?ko:K01953	P31752	2530	2.9e-284	Asparagine synthetase [glutamine-hydrolyzing] OS=Asparagus officinalis OX=4686 PE=2 SV=2	PF00733	Asparagine synthase	GO:0006529//GO:0006531//GO:0006522	asparagine biosynthetic process//aspartate metabolic process//alanine metabolic process	GO:0004066	asparagine synthase (glutamine-hydrolyzing) activity	--	--	KOG0571	Asparagine synthase (glutamine-hydrolyzing)	UP	1.1031	1.0136e-67	estscan,start:258 end:2238	Category 3
Cluster-6671.9573	5906	6864.61	6329	1491	1769.56	1659.83	59.78	63.63	54.5	10.12	11.43	12.29	6390	3490331	XP_008218175.1	3570	0	PREDICTED: serine..threonine-protein kinase EDR1 isoform X1 [Prunus mume]	XM_008219953.2	XM_008219953	2091	0	PREDICTED: Prunus mume serine/threonine-protein kinase EDR1 (LOC103318557), transcript variant X1, mRNA	--	--	--	--	Q9FPR3	1952	7.8e-217	Serine/threonine-protein kinase EDR1 OS=Arabidopsis thaliana OX=3702 GN=EDR1 PE=1 SV=1	PF07714//PF00069//PF08140	Protein tyrosine kinase//Protein kinase domain//Crustacean cuticle protein repeat	GO:0006468	protein phosphorylation	GO:0004672//GO:0005524//GO:0042302	protein kinase activity//ATP binding//structural constituent of cuticle	--	--	--	--	UP	2.3252	2.5031e-181	blast,frame:2 start:5765 end:6085|blast,frame:1 start:3490 end:5643	Category 3
Cluster-6671.9599	4857.95	5165.56	5727.85	3324.03	3178.1	2755.04	122.43	118.71	122.42	55.86	50.8	50.53	2742	--	--	--	--	--	XM_008241151.1	XM_008241151	992	0	PREDICTED: Prunus mume vignain-like (LOC103337980), mRNA	K16292	CEP, CYSEP	KDEL-tailed cysteine endopeptidase	http://www.genome.jp/dbget-bin/www_bget?ko:K16292	P12412	949	6.8e-101	Vignain OS=Vigna mungo OX=3915 PE=1 SV=1	PF00112//PF01625//PF03051	Papain family cysteine protease//Peptide methionine sulfoxide reductase//Peptidase C1-like family	GO:0006508//GO:0006464//GO:0055114	proteolysis//cellular protein modification process//oxidation-reduction process	GO:0004197//GO:0008113//GO:0008234	cysteine-type endopeptidase activity//peptide-methionine (S)-S-oxide reductase activity//cysteine-type peptidase activity	--	--	--	--	UP	1.1332	3.0576e-55	blast,frame:3 start:384 end:1280|blast,frame:1 start:1108 end:1662	Category 3
Cluster-6671.10058	1314	1320	1582.19	12379.8	11913.9	10370.3	16.17	14.86	16.55	102.06	93.48	93.27	5309	3568252	XP_008381574.1	1400	1.4e-151	PREDICTED: pentatricopeptide repeat-containing protein At1g06270 [Malus domestica]	XM_008230904.2	XM_008230904	1403	0	PREDICTED: Prunus mume pentatricopeptide repeat-containing protein At1g06270 (LOC103328507), transcript variant X1, mRNA	--	--	--	--	Q9LNC0	1009	1.4e-107	Pentatricopeptide repeat-containing protein At1g06270 OS=Arabidopsis thaliana OX=3702 GN=At1g06270 PE=2 SV=1	PF03347//PF03161//PF03051//PF00112	Vibrio thermostable direct hemolysin//LAGLIDADG DNA endonuclease family//Peptidase C1-like family//Papain family cysteine protease	GO:0006508//GO:0019836	proteolysis//hemolysis by symbiont of host erythrocytes	GO:0004197//GO:0004519//GO:0008234	cysteine-type endopeptidase activity//endonuclease activity//cysteine-type peptidase activity	GO:0005576	extracellular region	--	--	DOWN	-2.674	2.51e-276	blast,frame:-2 start:4561 end:3521	Category 4
Cluster-6671.10120	433.94	450.9	492.65	1265.09	1251.09	1085.02	17.99	16.97	17.26	34.76	32.67	32.55	1782	8272223	XP_007205228.2	905	1.2e-94	probable mitochondrial adenine nucleotide transporter BTL3 [Prunus persica]	XM_008235814.1	XM_008235814	907	0	PREDICTED: Prunus mume probable mitochondrial adenine nucleotide transporter BTL3 (LOC103333010), mRNA	--	--	--	--	Q9LV81	807	1.3e-84	Probable mitochondrial adenine nucleotide transporter BTL3 OS=Arabidopsis thaliana OX=3702 GN=At5g64970 PE=2 SV=1	PF02939	UcrQ family	GO:0015992//GO:0006119//GO:0006118	proton transport//oxidative phosphorylation//obsolete electron transport	GO:0008121	ubiquinol-cytochrome-c reductase activity	--	--	KOG0036	Predicted mitochondrial carrier protein	DOWN	-1.0183	1.1254e-24	blast,frame:1 start:475 end:1074	Category 4
Cluster-6671.10125	1270.33	1396.2	1564	6872.68	5814.94	4939	132.53	129.87	136.11	463.98	372.09	364.76	885	7841601	ONH92184.1	733	5.3e-75	hypothetical protein PRUPE_8G160900 [Prunus persica]	XM_008237978.1	XM_008237978	400	0	PREDICTED: Prunus mume proline-rich protein 4 (LOC103334993), mRNA	--	--	--	--	Q62635	172	2.7e-11	Mucin-2 (Fragment) OS=Rattus norvegicus OX=10116 GN=Muc2 PE=1 SV=1	PF05001//PF01442//PF07464//PF10399	RNA polymerase Rpb1 C-terminal repeat//Apolipoprotein A1/A4/E domain//Apolipophorin-III precursor (apoLp-III)//Ubiquitinol-cytochrome C reductase Fe-S subunit TAT signal	GO:0006869//GO:0055114//GO:0006366//GO:0042157//GO:0006119//GO:0006118//GO:0015992	lipid transport//oxidation-reduction process//transcription from RNA polymerase II promoter//lipoprotein metabolic process//oxidative phosphorylation//obsolete electron transport//proton transport	GO:0008121//GO:0008289//GO:0003677	ubiquinol-cytochrome-c reductase activity//lipid binding//DNA binding	GO:0005665//GO:0005576	DNA-directed RNA polymerase II, core complex//extracellular region	--	--	DOWN	-1.6946	3.4584e-67	blast,frame:2 start:320 end:883|blast,frame:-1 start:885 end:238	Category 4
Cluster-6671.10469	957	1039	1089	3164.49	3135.95	2774.07	33.1	32.67	31.88	72.71	68.5	69.58	2078	3454519	KDO84939.1	1466	1.3e-159	hypothetical protein CISIN_1g018158mg [Citrus sinensis]	XM_008222999.2	XM_008222999	759	0	PREDICTED: Prunus mume probable cinnamyl alcohol dehydrogenase 6 (LOC103321211), mRNA	K00083	E1.1.1.195	cinnamyl-alcohol dehydrogenase	http://www.genome.jp/dbget-bin/www_bget?ko:K00083	Q7XWU3	933	3.7e-99	Probable cinnamyl alcohol dehydrogenase 6 OS=Oryza sativa subsp. japonica OX=39947 GN=CAD6 PE=2 SV=2	PF00270//PF00107//PF02826//PF02254//PF13241//PF02737//PF08240//PF03446	DEAD/DEAH box helicase//Zinc-binding dehydrogenase//D-isomer specific 2-hydroxyacid dehydrogenase, NAD binding domain//TrkA-N domain//Putative NAD(P)-binding//3-hydroxyacyl-CoA dehydrogenase, NAD binding domain//Alcohol dehydrogenase GroES-like domain//NAD binding domain of 6-phosphogluconate dehydrogenase	GO:0019521//GO:0006568//GO:0018874//GO:0006098//GO:0006631//GO:0006554//GO:0019354//GO:0006633//GO:0006552//GO:0006813//GO:0006779//GO:0006550//GO:0055114//GO:0006574	D-gluconate metabolic process//tryptophan metabolic process//benzoate metabolic process//pentose-phosphate shunt//fatty acid metabolic process//lysine catabolic process//siroheme biosynthetic process//fatty acid biosynthetic process//leucine catabolic process//potassium ion transport//porphyrin-containing compound biosynthetic process//isoleucine catabolic process//oxidation-reduction process//va…	GO:0051287//GO:0043115//GO:0005524//GO:0004616//GO:0016491//GO:0003676//GO:0003857	NAD binding//precorrin-2 dehydrogenase activity//ATP binding//phosphogluconate dehydrogenase (decarboxylating) activity//oxidoreductase activity//nucleic acid binding//3-hydroxyacyl-CoA dehydrogenase activity	--	--	--	--	DOWN	-1.1895	1.4754e-53	estscan,start:444 end:1640	Category 4
Cluster-6671.10542	1174.16	1186.23	1428.84	3799.08	4689.3	4108.01	24.08	22.21	24.87	52.04	61.1	61.4	3303	--	--	--	--	--	XM_008240913.1	XM_008240913	728	0	PREDICTED: Prunus mume UDP-glucose 4-epimerase GEPI48 (LOC103337743), mRNA	K01784	galE, GALE	UDP-glucose 4-epimerase	http://www.genome.jp/dbget-bin/www_bget?ko:K01784	Q8LNZ3	377	1.7e-34	UDP-glucose 4-epimerase 1 OS=Oryza sativa subsp. japonica OX=39947 GN=UGE-1 PE=2 SV=1	PF05309//PF00106//PF01370//PF01073//PF02737	TraE protein//short chain dehydrogenase//NAD dependent epimerase/dehydratase family//3-beta hydroxysteroid dehydrogenase/isomerase family//3-hydroxyacyl-CoA dehydrogenase, NAD binding domain	GO:0006574//GO:0008152//GO:0000746//GO:0055114//GO:0006550//GO:0006694//GO:0008210//GO:0006552//GO:0006633//GO:0006554//GO:0006631//GO:0018874//GO:0008209//GO:0006568//GO:0008207	valine catabolic process//metabolic process//conjugation//oxidation-reduction process//isoleucine catabolic process//steroid biosynthetic process//estrogen metabolic process//leucine catabolic process//fatty acid biosynthetic process//lysine catabolic process//fatty acid metabolic process//benzoate metabolic process//androgen metabolic process//tryptophan metabolic process//C21-steroid hormone me…	GO:0003854//GO:0050662//GO:0003857//GO:0003824//GO:0016491//GO:0016616	3-beta-hydroxy-delta5-steroid dehydrogenase activity//coenzyme binding//3-hydroxyacyl-CoA dehydrogenase activity//catalytic activity//oxidoreductase activity//oxidoreductase activity, acting on the CH-OH group of donors, NAD or NADP as acceptor	--	--	KOG1371	UDP-glucose 4-epimerase/UDP-sulfoquinovose synthase	DOWN	-1.3666	8.8549e-64	blast,frame:2 start:875 end:1210|blast,frame:1 start:3127 end:3231	Category 4
Cluster-6671.10812	193	263	234	853	790	715	17.38	21.2	17.63	49.97	43.89	45.8	979	3498303	XP_008229410.1	389	4.5e-35	PREDICTED: transcription factor PAR1 [Prunus mume]	XM_008231188.1	XM_008231188	779	0	PREDICTED: Prunus mume transcription factor PAR1 (LOC103328777), mRNA	--	--	--	--	Q9SJH0	184	1.2e-12	Transcription factor PAR1 OS=Arabidopsis thaliana OX=3702 GN=PAR1 PE=1 SV=1	PF01577//PF04281//PF01080//PF04618//PF03832	Potyvirus P1 protease//Mitochondrial import receptor subunit Tom22//Presenilin//HD-ZIP protein N terminus//WSK motif	GO:0006886//GO:0006605//GO:0007165//GO:0006508	intracellular protein transport//protein targeting//signal transduction//proteolysis	GO:0004197//GO:0004190	cysteine-type endopeptidase activity//aspartic-type endopeptidase activity	GO:0005741//GO:0016021//GO:0005634	mitochondrial outer membrane//integral component of membrane//nucleus	--	--	DOWN	-1.4086	4.7806e-27	blast,frame:-1 start:979 end:464	Category 4
Cluster-6671.11112	820	827.94	912	8378.14	7767.85	6448.1	46.93	42.81	43.96	315.8	278.09	265.51	1372	6533458	XP_016647829.1	1170	1.7e-125	PREDICTED: BURP domain protein RD22-like isoform X2 [Prunus mume]	XM_016796987.1	XM_016796987	851	0	PREDICTED: Prunus mume BURP domain-containing protein 5-like (LOC103343226), mRNA	--	--	--	--	Q942D4	583	9.3e-59	BURP domain-containing protein 3 OS=Oryza sativa subsp. japonica OX=39947 GN=BURP3 PE=2 SV=1	PF06734//PF00218	UL97//Indole-3-glycerol phosphate synthase	GO:0006571//GO:0000162//GO:0016032//GO:0009094	tyrosine biosynthetic process//tryptophan biosynthetic process//viral process//L-phenylalanine biosynthetic process	GO:0005524//GO:0004672//GO:0004425	ATP binding//protein kinase activity//indole-3-glycerol-phosphate synthase activity	--	--	--	--	DOWN	-2.7726	1.3724e-223	blast,frame:3 start:3 end:707	Category 4
Cluster-6671.11191	726	784.52	842	3641	3152.01	2922	17.71	17.46	17.42	59.25	48.78	51.89	2823	6532360	XP_016646814.1	1124	7.7e-120	PREDICTED: protein YLS9 [Prunus mume]	XM_016791328.1	XM_016791328	1059	0	PREDICTED: Prunus mume protein YLS9 (LOC103330379), mRNA	--	--	--	--	Q9ZVD2	589	3.9e-59	NDR1/HIN1-like protein 13 OS=Arabidopsis thaliana OX=3702 GN=NHL13 PE=2 SV=1	PF12131	Protein of unknown function (DUF3586)	GO:0006508	proteolysis	GO:0004197	cysteine-type endopeptidase activity	--	--	--	--	DOWN	-1.6814	1.1973e-71	blast,frame:-2 start:1079 end:252	Category 4
Cluster-6671.11618	786	787	894	4621	4156	3546	30.06	27.34	28.92	117.26	100.25	98.24	1907	--	--	--	--	--	XM_008241936.2	XM_008241936	1170	0	PREDICTED: Prunus mume probable calcium-binding protein CML27 (LOC103338702), mRNA	K13448	CML	calcium-binding protein CML	http://www.genome.jp/dbget-bin/www_bget?ko:K13448	Q9LE22	458	4.1e-44	Probable calcium-binding protein CML27 OS=Arabidopsis thaliana OX=3702 GN=CML27 PE=1 SV=1	PF13833//PF13499//PF12763//PF10591//PF13202//PF00036//PF13405	EF-hand domain pair//EF-hand domain pair//Cytoskeletal-regulatory complex EF hand//Secreted protein acidic and rich in cysteine Ca binding region//EF hand//EF hand//EF-hand domain	GO:0007165	signal transduction	GO:0005515//GO:0005509	protein binding//calcium ion binding	GO:0005578	proteinaceous extracellular matrix	--	--	DOWN	-1.9531	2.4874e-98	blast,frame:-2 start:1555 end:935	Category 4
Cluster-6671.12043	843	971.91	1034	3562	3845.92	3276.98	16.3	17.17	16.98	46.04	47.29	46.22	3484	7859565	ONI10149.1	1853	2.8e-204	hypothetical protein PRUPE_4G030500 [Prunus persica]	XM_008226668.1	XM_008226668	1312	0	PREDICTED: Prunus mume pentatricopeptide repeat-containing protein At3g13160, mitochondrial-like (LOC103324597), mRNA	--	--	--	--	P0CV95	1097	5.9e-118	(3S,6E)-nerolidol synthase 2, chloroplastic/mitochondrial OS=Fragaria ananassa OX=3747 PE=1 SV=1	PF01397//PF09106//PF05853//PF03936	Terpene synthase, N-terminal domain//Elongation factor SelB, winged helix//3-keto-5-aminohexanoate cleavage enzyme//Terpene synthase family, metal binding domain	GO:0019475//GO:0006448//GO:0008152//GO:0001514	L-lysine catabolic process to acetate//regulation of translational elongation//metabolic process//selenocysteine incorporation	GO:0016829//GO:0005525//GO:0010333//GO:0000287//GO:0003746//GO:0016740//GO:0003723	lyase activity//GTP binding//terpene synthase activity//magnesium ion binding//translation elongation factor activity//transferase activity//RNA binding	GO:0005840//GO:0005737	ribosome//cytoplasm	--	--	DOWN	-1.5407	2.5868e-100	blast,frame:-3 start:2219 end:1521|blast,frame:-2 start:3483 end:2281|blast,frame:1 start:4 end:1263	Category 4
Cluster-6671.12055	327	377	410	1522	1683.99	1540	8.12	8.53	8.63	25.19	26.51	27.82	2780	3638664	CDP08489.1	2165	1.5e-240	unnamed protein product [Coffea canephora]	XM_008232430.2	XM_008232430	1488	0	PREDICTED: Prunus mume xyloglucan glycosyltransferase 4 (LOC103329903), mRNA	--	--	--	--	Q9LJP4	1610	1.5e-177	Xyloglucan glycosyltransferase 4 OS=Arabidopsis thaliana OX=3702 GN=CSLC4 PE=1 SV=1	PF09057//PF13506	Second Mitochondria-derived Activator of Caspases//Glycosyl transferase family 21	GO:0006919//GO:0006915	activation of cysteine-type endopeptidase activity involved in apoptotic process//apoptotic process	GO:0016757	transferase activity, transferring glycosyl groups	GO:0005739	mitochondrion	--	--	DOWN	-1.7267	6.1807e-75	estscan,start:2323 end:164; minus strand	Category 4
Cluster-6671.12655	119	143	139	1235	1054	972	8.78	9.49	8.61	59.65	48.31	51.31	1130	3496445	XP_008226736.1	512	2.9e-49	PREDICTED: calcium-binding protein PBP1-like [Prunus mume]	XM_008228514.1	XM_008228514	846	0	PREDICTED: Prunus mume calcium-binding protein PBP1-like (LOC103326301), mRNA	--	--	--	--	O81831	342	6.8e-31	Calcium-binding protein KRP1 OS=Arabidopsis thaliana OX=3702 GN=KRP1 PE=2 SV=1	PF13405//PF00036//PF13833//PF12763	EF-hand domain//EF hand//EF-hand domain pair//Cytoskeletal-regulatory complex EF hand	--	--	GO:0005509//GO:0005515	calcium ion binding//protein binding	--	--	--	--	DOWN	-2.6594	2.8321e-85	blast,frame:-3 start:888 end:370	Category 4
Cluster-6671.13309	197	200	242	1349	1500	1396	5.32	4.92	5.54	24.26	25.65	27.4	2580	3491957	XP_008220480.1	2719	7.9e-305	PREDICTED: probable leucine-rich repeat receptor-like protein kinase At1g68400 [Prunus mume]	XM_008222258.1	XM_008222258	2451	0	PREDICTED: Prunus mume probable leucine-rich repeat receptor-like protein kinase At1g68400 (LOC103320561), mRNA	--	--	--	--	O48788	814	2.9e-85	Probable inactive receptor kinase At2g26730 OS=Arabidopsis thaliana OX=3702 GN=At2g26730 PE=1 SV=1	PF02072//PF13855//PF00560//PF00069//PF07714	Prepro-orexin//Leucine rich repeat//Leucine Rich Repeat//Protein kinase domain//Protein tyrosine kinase	GO:0007218//GO:0006468//GO:0007631	neuropeptide signaling pathway//protein phosphorylation//feeding behavior	GO:0004672//GO:0005524//GO:0005515	protein kinase activity//ATP binding//protein binding	--	--	--	--	DOWN	-2.3675	2.136e-107	blast,frame:-2 start:2234 end:150	Category 4
Cluster-6671.13529	188	202	198	852	695	577	11.6	11.24	10.28	34.56	26.77	25.57	1294	7847219	ONH97802.1	1545	5.4e-169	hypothetical protein PRUPE_7G211600 [Prunus persica]	XM_007202269.1	XM_007202269	1200	0	Prunus persica hypothetical protein (PRUPE_ppa009163mg) mRNA, complete cds	K01489	cdd, CDA	cytidine deaminase	http://www.genome.jp/dbget-bin/www_bget?ko:K01489	O65896	967	2.6e-103	Cytidine deaminase 1 OS=Arabidopsis thaliana OX=3702 GN=CDA1 PE=1 SV=1	PF08211//PF01135//PF00383	Cytidine and deoxycytidylate deaminase zinc-binding region//Protein-L-isoaspartate(D-aspartate) O-methyltransferase (PCMT)//Cytidine and deoxycytidylate deaminase zinc-binding region	GO:0046500//GO:0006479//GO:0006807//GO:0006206//GO:0006464//GO:0046087//GO:0009972	S-adenosylmethionine metabolic process//protein methylation//nitrogen compound metabolic process//pyrimidine nucleobase metabolic process//cellular protein modification process//cytidine metabolic process//cytidine deamination	GO:0004719//GO:0004126//GO:0008270	protein-L-isoaspartate (D-aspartate) O-methyltransferase activity//cytidine deaminase activity//zinc ion binding	--	--	--	--	DOWN	-1.4835	1.1296e-22	blast,frame:-2 start:1293 end:298	Category 4
Cluster-6671.13748	131	144	155	652	644	526	6.08	6.06	6.07	20.02	18.79	17.64	1623	7845905	ONH96488.1	1701	5.5e-187	hypothetical protein PRUPE_7G132100 [Prunus persica]	XM_008243247.2	XM_008243247	1302	0	PREDICTED: Prunus mume mitogen-activated protein kinase kinase kinase 3 (LOC103339898), mRNA	--	--	--	--	O80888	518	3.8e-51	Mitogen-activated protein kinase kinase kinase 17 OS=Arabidopsis thaliana OX=3702 GN=MAPKKK17 PE=1 SV=1	PF07714//PF00069	Protein tyrosine kinase//Protein kinase domain	GO:0006468	protein phosphorylation	GO:0004672//GO:0005524	protein kinase activity//ATP binding	--	--	--	--	DOWN	-1.7152	1.3883e-34	blast,frame:-1 start:1623 end:454	Category 4
Cluster-6671.14322	429.62	445.39	500.85	1396.88	1258.36	999.49	21.76	20.42	21.4	46.72	39.98	36.51	1512	--	--	--	--	--	XM_016792703.1	XM_016792703	1374	0	PREDICTED: Prunus mume uncharacterized LOC103325393 (LOC103325393), mRNA	--	--	--	--	C0LGH3	1343	7.7e-147	Probable LRR receptor-like serine/threonine-protein kinase At1g56140 OS=Arabidopsis thaliana OX=3702 GN=At1g56140 PE=2 SV=2	PF07714//PF00069	Protein tyrosine kinase//Protein kinase domain	GO:0006468	protein phosphorylation	GO:0004672//GO:0005524	protein kinase activity//ATP binding	--	--	--	--	DOWN	-1.0405	1.0972e-18	blast,frame:2 start:2 end:1312	Category 4
Cluster-6671.14401	286	354.8	324.83	1432.69	1384.83	1231.94	6.55	7.41	6.31	21.9	20.13	20.55	2988	3488399	XP_008222515.1	1481	3.3e-161	PREDICTED: LOW QUALITY PROTEIN: probable serine..threonine-protein kinase RLCKVII [Prunus mume]	XM_008224293.2	XM_008224293	835	0	PREDICTED: Prunus mume probable serine/threonine-protein kinase RLCKVII (LOC103322380), mRNA	--	--	--	--	Q9LQQ8	1141	4e-123	Probable serine/threonine-protein kinase PBL5 OS=Arabidopsis thaliana OX=3702 GN=PBL5 PE=2 SV=1	PF07714//PF02951//PF00069	Protein tyrosine kinase//Prokaryotic glutathione synthetase, N-terminal domain//Protein kinase domain	GO:0006468//GO:0006750	protein phosphorylation//glutathione biosynthetic process	GO:0004672//GO:0004363//GO:0005524	protein kinase activity//glutathione synthase activity//ATP binding	--	--	--	--	DOWN	-1.7013	4.2108e-57	blast,frame:-1 start:2175 end:1198|blast,frame:-2 start:611 end:291	Category 4
Cluster-6671.14769	477	484	509	1690	1552	1504	25.97	23.83	23.36	60.67	52.93	58.98	1427	3501900	XP_008234445.1	1349	3.2e-146	PREDICTED: ethylene-responsive transcription factor ERF105 [Prunus mume]	XM_008236223.2	XM_008236223	1328	0	PREDICTED: Prunus mume ethylene-responsive transcription factor ERF105 (LOC103333393), mRNA	K09286	EREBP	EREBP-like factor	http://www.genome.jp/dbget-bin/www_bget?ko:K09286	Q40478	472	7.2e-46	Ethylene-responsive transcription factor 5 OS=Nicotiana tabacum OX=4097 GN=ERF5 PE=2 SV=1	PF01080//PF00847	Presenilin//AP2 domain	GO:0006355	regulation of transcription, DNA-templated	GO:0004190//GO:0003700	aspartic-type endopeptidase activity//transcription factor activity, sequence-specific DNA binding	GO:0016021//GO:0005667	integral component of membrane//transcription factor complex	--	--	DOWN	-1.3249	4.8e-40	blast,frame:-1 start:1385 end:246	Category 4
Cluster-6671.15192	148	149	177	759	746	623	5.62	5.14	5.68	19.12	17.86	17.13	1919	8271177	XP_020421631.1	1140	7.3e-122	probably inactive leucine-rich repeat receptor-like protein kinase IMK2 isoform X2 [Prunus persica]	XM_007206169.1	XM_007206169	874	0	Prunus persica hypothetical protein (PRUPE_ppa015441mg) mRNA, partial cds	--	--	--	--	Q9SCT4	756	1.1e-78	Probably inactive leucine-rich repeat receptor-like protein kinase IMK2 OS=Arabidopsis thaliana OX=3702 GN=IMK2 PE=1 SV=1	PF07714//PF13855//PF00069//PF00560	Protein tyrosine kinase//Leucine rich repeat//Protein kinase domain//Leucine Rich Repeat	GO:0006468	protein phosphorylation	GO:0005515//GO:0004672//GO:0005524	protein binding//protein kinase activity//ATP binding	--	--	--	--	DOWN	-1.7994	1.002e-41	blast,frame:1 start:1 end:915|blast,frame:3 start:900 end:1619	Category 4
Cluster-6671.15836	28	22	18	289	239.38	198.19	6.93	4.69	3.62	44.15	34.5	33.26	537	3503937	XP_008237260.1	315	9.5e-27	PREDICTED: cytochrome c oxidase subunit 5C-2-like [Prunus mume]	XM_008239038.2	XM_008239038	370	0	PREDICTED: Prunus mume cytochrome c oxidase subunit 5C-2-like (LOC103336003), mRNA	--	--	--	--	Q8VY39	224	1.6e-17	Cytochrome c oxidase subunit 5C-2 OS=Helianthus annuus OX=4232 GN=COX5C2 PE=3 SV=1	PF06743	FAST kinase-like protein, subdomain 1	--	--	GO:0004672	protein kinase activity	--	--	--	--	DOWN	-3.0407	4.6678e-28	blast,frame:1 start:151 end:342	Category 4
Cluster-6671.15850	454	457	537.84	1933.63	1952.54	1878.26	11.81	10.84	11.87	33.54	32.21	35.56	2665	5963745	KVI00401.1	730	3.6e-74	Protein kinase, ATP binding site-containing protein [Cynara cardunculus var. scolymus]	XM_008226707.1	XM_008226707	557	0	PREDICTED: Prunus mume mitogen-activated protein kinase 3 (LOC103324623), mRNA	K04371	MAPK1_3	mitogen-activated protein kinase 1/3	http://www.genome.jp/dbget-bin/www_bget?ko:K04371	Q39023	626	1.9e-63	Mitogen-activated protein kinase 3 OS=Arabidopsis thaliana OX=3702 GN=MPK3 PE=1 SV=2	PF07714//PF00069//PF04281	Protein tyrosine kinase//Protein kinase domain//Mitochondrial import receptor subunit Tom22	GO:0006468//GO:0006886	protein phosphorylation//intracellular protein transport	GO:0004672//GO:0005524	protein kinase activity//ATP binding	GO:0005741	mitochondrial outer membrane	--	--	DOWN	-1.6286	2.0296e-71	blast,frame:3 start:1893 end:2114|blast,frame:2 start:1607 end:1900	Category 4
Cluster-6671.15853	259	320	314	1857	1725	1582	9.04	10.15	9.27	43.05	38.02	40.03	2062	3492714	XP_008221464.1	832	4.1e-86	PREDICTED: probable calcium-binding protein CML25 [Prunus mume]	XM_008223242.2	XM_008223242	1215	0	PREDICTED: Prunus mume probable calcium-binding protein CML25 (LOC103321442), mRNA	K13448	CML	calcium-binding protein CML	http://www.genome.jp/dbget-bin/www_bget?ko:K13448	Q9FYK2	555	2.5e-55	Probable calcium-binding protein CML25 OS=Arabidopsis thaliana OX=3702 GN=CML25 PE=2 SV=1	PF00404//PF13405//PF00036//PF13499//PF10591//PF13202//PF13833//PF12763	Dockerin type I repeat//EF-hand domain//EF hand//EF-hand domain pair//Secreted protein acidic and rich in cysteine Ca binding region//EF hand//EF-hand domain pair//Cytoskeletal-regulatory complex EF hand	GO:0007165//GO:0005975	signal transduction//carbohydrate metabolic process	GO:0005509//GO:0004553//GO:0005515	calcium ion binding//hydrolase activity, hydrolyzing O-glycosyl compounds//protein binding	GO:0005578	proteinaceous extracellular matrix	KOG0027	Calmodulin and related proteins (EF-Hand superfamily)	DOWN	-2.1678	2.4681e-95	blast,frame:-3 start:1505 end:843	Category 4
Cluster-6671.16150	528	534	682	2018	1731	1612	19.42	17.85	21.23	49.28	40.19	42.98	1971	7880025	ONI30609.1	2072	6.4e-230	hypothetical protein PRUPE_1G262000 [Prunus persica]	XM_008223258.2	XM_008223258	1716	0	PREDICTED: Prunus mume probable galacturonosyltransferase-like 9 (LOC103321454), mRNA	--	--	--	--	O04536	1505	1.6e-165	Probable galacturonosyltransferase-like 9 OS=Arabidopsis thaliana OX=3702 GN=GATL9 PE=2 SV=1	PF08496//PF12767//PF02507//PF10278//PF15686//PF02535//PF03137//PF01501//PF15168//PF14630	Peptidase family S49 N-terminal//Transcriptional regulator of RNA polII, SAGA, subunit//Photosystem I reaction centre subunit III//Mediator of RNA pol II transcription subunit 19//Lysine-rich CEACAM1 co-isolated protein family//ZIP Zinc transporter//Organic Anion Transporter Polypeptide (OATP) family//Glycosyl transferase family 8//Triple QxxK/R motif-containing protein family//Origin recognition…	GO:0043066//GO:0006810//GO:0045766//GO:0006260//GO:0055085//GO:0015979//GO:0043123//GO:0006357//GO:0030001	negative regulation of apoptotic process//transport//positive regulation of angiogenesis//DNA replication//transmembrane transport//photosynthesis//positive regulation of I-kappaB kinase/NF-kappaB signaling//regulation of transcription from RNA polymerase II promoter//metal ion transport	GO:0016757//GO:0046873//GO:0004252//GO:0005215//GO:0001104	transferase activity, transferring glycosyl groups//metal ion transmembrane transporter activity//serine-type endopeptidase activity//transporter activity//RNA polymerase II transcription cofactor activity	GO:0000808//GO:0005789//GO:0070461//GO:0005886//GO:0005634//GO:0009538//GO:0009522//GO:0016592//GO:0016020	origin recognition complex//endoplasmic reticulum membrane//SAGA-type complex//plasma membrane//nucleus//photosystem I reaction center//photosystem I//mediator complex//membrane	--	--	DOWN	-1.2592	9.9603e-31	blast,frame:1 start:202 end:1638	Category 4
Cluster-6671.16609	495	556	588	1580	1614	1354	16.25	16.61	16.35	34.49	33.5	32.26	2173	3492068	XP_008220626.1	2295	9.8e-256	PREDICTED: aspartyl protease family protein At5g10770-like [Prunus mume]	XM_008222404.2	XM_008222404	1564	0	PREDICTED: Prunus mume aspartyl protease family protein At5g10770-like (LOC103320692), mRNA	--	--	--	--	Q8S9J6	1224	7e-133	Aspartyl protease family protein At5g10770 OS=Arabidopsis thaliana OX=3702 GN=At5g10770 PE=2 SV=1	PF00026	Eukaryotic aspartyl protease	GO:0006508	proteolysis	GO:0004190	aspartic-type endopeptidase activity	--	--	--	--	DOWN	-1.1051	1.9157e-33	blast,frame:2 start:143 end:1624	Category 4
Cluster-6671.17231	154	155	185	1073	1016	802	6.07	5.55	6.17	28.07	25.26	22.91	1858	8259991	XP_007223954.2	1096	9e-117	protein TIFY 9 [Prunus persica]	XM_008224140.1	XM_008224140	1323	0	PREDICTED: Prunus mume protein TIFY 9 (LOC103322242), mRNA	--	--	--	--	Q93ZM9	364	3.1e-33	Protein TIFY 9 OS=Arabidopsis thaliana OX=3702 GN=TIFY9 PE=1 SV=1	PF11889//PF06203	Domain of unknown function (DUF3409)//CCT motif	GO:0006144//GO:0006508	purine nucleobase metabolic process//proteolysis	GO:0005515//GO:0004197//GO:0003968//GO:0016817//GO:0004252//GO:0070008//GO:0017111	protein binding//cysteine-type endopeptidase activity//RNA-directed RNA polymerase activity//hydrolase activity, acting on acid anhydrides//serine-type endopeptidase activity//serine-type exopeptidase activity//nucleoside-triphosphatase activity	GO:0031379	RNA-directed RNA polymerase complex	--	--	DOWN	-2.1808	2.5423e-61	blast,frame:-3 start:1805 end:951	Category 4
Cluster-6671.17824	148	183	166	633.36	590	568.75	7.95	8.89	7.52	22.45	19.86	22.02	1442	3499327	XP_008230821.1	437	1.8e-40	PREDICTED: lamin-like protein [Prunus mume]	XM_008232599.1	XM_008232599	450	0	PREDICTED: Prunus mume lamin-like protein (LOC103330056), mRNA	--	--	--	--	Q39131	139	3e-07	Lamin-like protein OS=Arabidopsis thaliana OX=3702 GN=At5g15350 PE=1 SV=1	PF07966//PF02298	A1 Propeptide//Plastocyanin-like domain	GO:0006118//GO:0006508	obsolete electron transport//proteolysis	GO:0004190//GO:0009055	aspartic-type endopeptidase activity//electron carrier activity	--	--	--	--	DOWN	-1.4856	3.0585e-26	blast,frame:1 start:886 end:1290	Category 4
Cluster-6671.1876	111	88	140	388	331	321	8.47	6.04	8.97	19.37	15.68	17.52	1102	9082697	XP_021816573.1	885	1.6e-92	mavicyanin [Prunus avium]	XM_008241017.2	XM_008241017	789	0	PREDICTED: Prunus mume mavicyanin (LOC103337851), mRNA	--	--	--	--	Q9SK27	204	6.6e-15	Early nodulin-like protein 1 OS=Arabidopsis thaliana OX=3702 GN=At2g25060 PE=1 SV=2	PF16965//PF02298	Ceramide synthase regulator//Plastocyanin-like domain	GO:0006874//GO:0006118	cellular calcium ion homeostasis//obsolete electron transport	GO:0030234//GO:0009055	enzyme regulator activity//electron carrier activity	GO:0030176	integral component of endoplasmic reticulum membrane	--	--	DOWN	-1.2561	3.401e-11	blast,frame:3 start:309 end:905	Category 4
Cluster-6671.2989	309	343	390	914	1012	834	8.15	8.25	8.73	16.08	16.93	16.01	2632	--	--	--	--	--	XM_008228229.1	XM_008228229	1721	0	PREDICTED: Prunus mume uncharacterized LOC103326025 (LOC103326025), mRNA	--	--	--	--	Q5QNI2	641	3.4e-65	Sodium/calcium exchanger NCL1 OS=Oryza sativa subsp. japonica OX=39947 GN=NCL1 PE=2 SV=1	PF01090//PF10591//PF13499//PF13202//PF00036//PF01699//PF13833//PF13405	Ribosomal protein S19e//Secreted protein acidic and rich in cysteine Ca binding region//EF-hand domain pair//EF hand//EF hand//Sodium/calcium exchanger protein//EF-hand domain pair//EF-hand domain	GO:0055085//GO:0006412//GO:0042254//GO:0007165	transmembrane transport//translation//ribosome biogenesis//signal transduction	GO:0003735//GO:0005509	structural constituent of ribosome//calcium ion binding	GO:0016021//GO:0005578//GO:0005840	integral component of membrane//proteinaceous extracellular matrix//ribosome	--	--	DOWN	-1.0386	1.8949e-22	blast,frame:1 start:2203 end:2274|blast,frame:2 start:662 end:2452	Category 4
Cluster-6671.3212	841	877	1030	2478.13	2767	2437	18.02	17.16	18.73	35.46	37.67	38.05	3173	3504614	XP_008238247.1	2527	1.8e-282	PREDICTED: transcription factor MYC2 [Prunus mume]	XM_008240025.2	XM_008240025	2720	0	PREDICTED: Prunus mume transcription factor MYC2 (LOC103336894), mRNA	K13422	MYC2	transcription factor MYC2	http://www.genome.jp/dbget-bin/www_bget?ko:K13422	Q39204	1351	1.9e-147	Transcription factor MYC2 OS=Arabidopsis thaliana OX=3702 GN=MYC2 PE=1 SV=2	PF15898//PF00010	cGMP-dependent protein kinase interacting domain//Helix-loop-helix DNA-binding domain	--	--	GO:0019901//GO:0046983	protein kinase binding//protein dimerization activity	--	--	--	--	DOWN	-1.1174	1.0514e-46	blast,frame:-1 start:2549 end:477	Category 4
Cluster-6671.3256	299	311	341	1093	912	831	13.2	12.45	12.72	31.95	25.34	26.53	1691	--	--	--	--	--	XM_008230991.2	XM_008230991	764	0	PREDICTED: Prunus mume probable calcium-binding protein CML23 (LOC103328591), mRNA	K13448	CML	calcium-binding protein CML	http://www.genome.jp/dbget-bin/www_bget?ko:K13448	Q9C8Y1	400	1.9e-37	Probable calcium-binding protein CML23 OS=Arabidopsis thaliana OX=3702 GN=CML23 PE=2 SV=1	PF13405//PF13833//PF12763//PF13202//PF00036//PF10591//PF08651//PF13499	EF-hand domain//EF-hand domain pair//Cytoskeletal-regulatory complex EF hand//EF hand//EF hand//Secreted protein acidic and rich in cysteine Ca binding region//DASH complex subunit Duo1//EF-hand domain pair	GO:0007067//GO:0007165	mitotic nuclear division//signal transduction	GO:0005515//GO:0005509	protein binding//calcium ion binding	GO:0042729//GO:0005578//GO:0072686	DASH complex//proteinaceous extracellular matrix//mitotic spindle	--	--	DOWN	-1.2111	9.8141e-22	blast,frame:1 start:1 end:741	Category 4
Cluster-6671.3736	548	523	542	1542	1431	1309	24.39	21.11	20.38	45.43	40.06	42.11	1680	3504215	XP_008237695.1	1031	2.8e-109	PREDICTED: bidirectional sugar transporter SWEET1 [Prunus mume]	XM_007200528.1	XM_007200528	830	0	Prunus persica hypothetical protein (PRUPE_ppa010181mg) mRNA, complete cds	K15382	SLC50A, SWEET	solute carrier family 50 (sugar transporter)	http://www.genome.jp/dbget-bin/www_bget?ko:K15382	Q8L9J7	765	9e-80	Bidirectional sugar transporter SWEET1 OS=Arabidopsis thaliana OX=3702 GN=SWEET1 PE=1 SV=1	PF03083//PF05297//PF03419//PF02580	Sugar efflux transporter for intercellular exchange//Herpesvirus latent membrane protein 1 (LMP1)//Sporulation factor SpoIIGA//D-Tyr-tRNA(Tyr) deacylase	GO:0019087//GO:0019478//GO:0030436//GO:0006508	transformation of host cell by virus//D-amino acid catabolic process//asexual sporulation//proteolysis	GO:0004190//GO:0016788	aspartic-type endopeptidase activity//hydrolase activity, acting on ester bonds	GO:0005737//GO:0016021	cytoplasm//integral component of membrane	--	--	DOWN	-1.0385	5.0381e-23	blast,frame:-3 start:997 end:272|blast,frame:-1 start:1617 end:1243	Category 4
Cluster-6671.3798	205	217	270	1315	1281.85	1202	6.6	6.36	7.37	28.17	26.11	28.11	2209	7866954	ONI17538.1	2089	7.7e-232	hypothetical protein PRUPE_3G165900 [Prunus persica]	XR_515030.2	XR_515030	1471	0	PREDICTED: Prunus mume aspartic proteinase PCS1-like (LOC103344067), misc_RNA	--	--	--	--	Q9LZL3	635	1.4e-64	Aspartic proteinase PCS1 OS=Arabidopsis thaliana OX=3702 GN=PCS1 PE=2 SV=1	PF00026//PF08184	Eukaryotic aspartyl protease//Cuticle protein 7 isoform family	GO:0006508	proteolysis	GO:0042302//GO:0004190	structural constituent of cuticle//aspartic-type endopeptidase activity	--	--	--	--	DOWN	-2.0949	1.275e-79	blast,frame:2 start:2 end:1360	Category 4
Cluster-6671.3962	324	318	383	1132	925	968	10.06	8.98	10.07	23.37	18.16	21.82	2282	9094232	XP_021829315.1	1796	7.5e-198	protein LYK5 [Prunus avium]	XM_008239652.2	XM_008239652	2115	0	PREDICTED: Prunus mume protein LYK5 (LOC103336594), mRNA	--	--	--	--	O22808	914	6.5e-97	Protein LYK5 OS=Arabidopsis thaliana OX=3702 GN=LYK5 PE=2 SV=1	PF01299//PF10099//PF00069//PF07714//PF02480	Lysosome-associated membrane glycoprotein (Lamp)//Anti-sigma-K factor rskA//Protein kinase domain//Protein tyrosine kinase//Alphaherpesvirus glycoprotein E	GO:0006468	protein phosphorylation	GO:0005524//GO:0004672	ATP binding//protein kinase activity	GO:0016020//GO:0005886//GO:0016021	membrane//plasma membrane//integral component of membrane	--	--	DOWN	-1.2008	1.8358e-21	blast,frame:-2 start:2218 end:161	Category 4
Cluster-6671.4675	250.78	327.84	298.22	1005.85	922.63	903.86	9.76	11.59	9.82	25.97	22.64	25.48	1879	7883152	ONI33736.1	983	1.2e-103	hypothetical protein PRUPE_1G443900 [Prunus persica]	XM_008221912.1	XM_008221912	515	0	PREDICTED: Prunus mume serine/threonine-protein kinase Aurora-1 (LOC103320262), mRNA	K08850	AURKX	aurora kinase, other	http://www.genome.jp/dbget-bin/www_bget?ko:K08850	Q9M077	904	7.7e-96	Serine/threonine-protein kinase Aurora-1 OS=Arabidopsis thaliana OX=3702 GN=AUR1 PE=1 SV=1	PF13931//PF07714//PF00069	Kinesin-associated microtubule-binding//Protein tyrosine kinase//Protein kinase domain	GO:0006468	protein phosphorylation	GO:0008017//GO:0005524//GO:0004672	microtubule binding//ATP binding//protein kinase activity	GO:0045298	tubulin complex	KOG0580	Serine/threonine protein kinase	DOWN	-1.329	5.403e-28	blast,frame:-2 start:594 end:409	Category 4
Cluster-6671.4977	140	145	177	559	473	492	9.09	8.49	9.67	23.84	19.15	22.93	1244	3502533	XP_008235282.1	1577	1e-172	PREDICTED: uncharacterized protein LOC103334121 [Prunus mume]	XM_008237060.1	XM_008237060	1169	0	PREDICTED: Prunus mume uncharacterized LOC103334121 (LOC103334121), mRNA	--	--	--	--	--	--	--	--	PF01166//PF15898//PF08988//PF06156	TSC-22/dip/bun family//cGMP-dependent protein kinase interacting domain//Type III secretion system, cytoplasmic E component of needle//Protein of unknown function (DUF972)	GO:0009405//GO:0006260//GO:0006355	pathogenesis//DNA replication//regulation of transcription, DNA-templated	GO:0019901//GO:0003700	protein kinase binding//transcription factor activity, sequence-specific DNA binding	GO:0005667	transcription factor complex	--	--	DOWN	-1.3625	8.0984e-19	blast,frame:-3 start:1242 end:169	Category 4
Cluster-6671.5168	730	836	884	1813	2491	2154	10.29	10.78	10.59	17.11	22.37	22.18	4672	3495899	XP_008225938.1	5812	0	PREDICTED: LRR receptor-like serine..threonine-protein kinase GSO1 [Prunus mume]	XM_008227716.2	XM_008227716	4206	0	PREDICTED: Prunus mume LRR receptor-like serine/threonine-protein kinase GSO1 (LOC103325535), mRNA	--	--	--	--	C0LGQ5	3909	0	LRR receptor-like serine/threonine-protein kinase GSO1 OS=Arabidopsis thaliana OX=3702 GN=GSO1 PE=1 SV=1	PF07714//PF00069//PF04406//PF00560//PF13855//PF01304	Protein tyrosine kinase//Protein kinase domain//Type IIB DNA topoisomerase//Leucine Rich Repeat//Leucine rich repeat//Gas vesicles protein GVPc repeated domain	GO:0006259//GO:0031412//GO:0006468	DNA metabolic process//gas vesicle organization//protein phosphorylation	GO:0004672//GO:0003824//GO:0003677//GO:0005524//GO:0005515	protein kinase activity//catalytic activity//DNA binding//ATP binding//protein binding	GO:0031411//GO:0005694	gas vesicle//chromosome	--	--	DOWN	-1.0307	1.8045e-24	blast,frame:-3 start:4109 end:252	Category 4
Cluster-6671.6659	308	320	334	1176	1135.16	1016.02	11.68	11.02	10.71	29.59	27.15	27.91	1921	--	--	--	--	--	XM_008247189.1	XM_008247189	621	0	PREDICTED: Prunus mume annexin D3-like (LOC103343527), mRNA	K17095	ANXA7_11	annexin A7/11	http://www.genome.jp/dbget-bin/www_bget?ko:K17095	Q9SE45	466	4.8e-45	Annexin D3 OS=Arabidopsis thaliana OX=3702 GN=ANN3 PE=2 SV=2	PF00191	Annexin	--	--	GO:0005544//GO:0005509	calcium-dependent phospholipid binding//calcium ion binding	--	--	KOG0819	Annexin	DOWN	-1.4224	2.7051e-40	blast,frame:-1 start:1873 end:1280	Category 4
Cluster-6671.6778	732	759.99	893	2440	2569	2142	28.28	26.67	29.17	62.53	62.58	59.93	1891	--	--	--	--	--	XM_008239807.1	XM_008239807	1579	0	PREDICTED: Prunus mume serine/threonine-protein kinase At5g01020 (LOC103336706), mRNA	--	--	--	--	Q9SY91	1520	2.9e-167	Probable serine/threonine-protein kinase PBL15 OS=Arabidopsis thaliana OX=3702 GN=PBL15 PE=1 SV=1	PF00069//PF07714	Protein kinase domain//Protein tyrosine kinase	GO:0006468	protein phosphorylation	GO:0004672//GO:0005524	protein kinase activity//ATP binding	--	--	--	--	DOWN	-1.2172	3.1548e-50	blast,frame:-2 start:1890 end:568	Category 4
Cluster-6671.8326	343	392.65	468.54	1961.9	2364.64	1815.54	27.95	28.71	32	104.34	119.31	105.56	1051	6533458	XP_016647829.1	840	2.5e-87	PREDICTED: BURP domain protein RD22-like isoform X2 [Prunus mume]	XM_016792343.1	XM_016792343	522	0	PREDICTED: Prunus mume BURP domain protein RD22-like (LOC103319971), transcript variant X2, mRNA	--	--	--	--	Q942D4	209	1.7e-15	BURP domain-containing protein 3 OS=Oryza sativa subsp. japonica OX=39947 GN=BURP3 PE=2 SV=1	PF00734//PF00641//PF04272	Fungal cellulose binding domain//Zn-finger in Ran binding protein and others//Phospholamban	GO:0006816//GO:0005975//GO:0006810	calcium ion transport//carbohydrate metabolic process//transport	GO:0005246//GO:0004553//GO:0030248//GO:0008270//GO:0042030	calcium channel regulator activity//hydrolase activity, hydrolyzing O-glycosyl compounds//cellulose binding//zinc ion binding//ATPase inhibitor activity	GO:0005576//GO:0016020	extracellular region//membrane	--	--	DOWN	-1.9826	9.6774e-93	estscan,start:266 end:1051	Category 4
Cluster-6671.8362	280.2	307.69	322.5	818.76	1015.15	854.77	16.93	16.78	16.4	32.55	38.32	37.12	1315	--	--	--	--	--	XM_007214218.1	XM_007214218	471	0	Prunus persica hypothetical protein (PRUPE_ppa026535mg) mRNA, partial cds	--	--	--	--	C0LGH2	416	2.1e-39	Probable LRR receptor-like serine/threonine-protein kinase At1g56130 OS=Arabidopsis thaliana OX=3702 GN=At1g56130 PE=2 SV=2	PF00069//PF07714	Protein kinase domain//Protein tyrosine kinase	GO:0006468	protein phosphorylation	GO:0005524//GO:0004672	ATP binding//protein kinase activity	--	--	--	--	DOWN	-1.1939	1.9472e-26	blast,frame:-1 start:1066 end:602	Category 4
Cluster-6671.8587	41	39	51	221	203.1	193.82	5.83	4.89	6	20.06	17.45	19.27	726	3502603	XP_008235373.1	811	3.9e-84	PREDICTED: sulfate transporter 3.1 [Prunus mume]	XM_008237151.2	XM_008237151	690	0	PREDICTED: Prunus mume sulfate transporter 3.1 (LOC103334206), mRNA	K17471	SULTR3	sulfate transporter 3	http://www.genome.jp/dbget-bin/www_bget?ko:K17471	Q9SV13	552	1.9e-55	Sulfate transporter 3.1 OS=Arabidopsis thaliana OX=3702 GN=SULTR3;1 PE=2 SV=1	PF00433	Protein kinase C terminal domain	GO:0009069//GO:0006468//GO:0016310	serine family amino acid metabolic process//protein phosphorylation//phosphorylation	GO:0004674//GO:0005524	protein serine/threonine kinase activity//ATP binding	--	--	--	--	DOWN	-1.8753	9.7286e-16	blast,frame:-3 start:370 end:92	Category 4
Cluster-6671.8945	224	216	281	1369.88	1433	1275.99	8.3	7.27	8.81	33.69	33.5	34.26	1959	--	--	--	--	--	XM_008237804.2	XM_008237804	808	0	PREDICTED: Prunus mume probable BOI-related E3 ubiquitin-protein ligase 3 (LOC103334830), mRNA	K19042	BOI	E3 ubiquitin-protein ligase BOI and related proteins	http://www.genome.jp/dbget-bin/www_bget?ko:K19042	Q9LDD1	309	7.9e-27	Probable BOI-related E3 ubiquitin-protein ligase 3 OS=Arabidopsis thaliana OX=3702 GN=BRG3 PE=1 SV=1	PF03153//PF17060//PF04006//PF03234//PF00895//PF16716//PF09606	Transcription factor IIA, alpha/beta subunit//Monopolar spindle protein 2//Mpp10 protein//Cdc37 N terminal kinase binding//ATP synthase protein 8//Bone marrow stromal antigen 2//ARC105 or Med15 subunit of Mediator complex non-fungal	GO:0030474//GO:0006357//GO:0015986//GO:0006367//GO:0015992//GO:0051607//GO:0006364//GO:0071988	spindle pole body duplication//regulation of transcription from RNA polymerase II promoter//ATP synthesis coupled proton transport//transcription initiation from RNA polymerase II promoter//proton transport//defense response to virus//rRNA processing//protein localization to spindle pole body	GO:0015078//GO:0001104//GO:0019901	hydrogen ion transmembrane transporter activity//RNA polymerase II transcription cofactor activity//protein kinase binding	GO:0016592//GO:0000276//GO:0034457//GO:0005732//GO:0005634//GO:0005672	mediator complex//mitochondrial proton-transporting ATP synthase complex, coupling factor F(o)//Mpp10 complex//small nucleolar ribonucleoprotein complex//nucleus//transcription factor TFIIA complex	--	--	DOWN	-2.1354	1.7631e-88	blast,frame:-1 start:963 end:367|blast,frame:-2 start:1391 end:879	Category 4
Cluster-6671.9018	2173	2350	2659	7275	7802	6875	92.39	90.65	95.53	204.88	208.82	211.42	1745	--	--	--	--	--	XM_007222731.1	XM_007222731	1278	0	Prunus persica hypothetical protein (PRUPE_ppa006663mg) mRNA, complete cds	K00306	PIPOX	sarcosine oxidase / L-pipecolate oxidase	http://www.genome.jp/dbget-bin/www_bget?ko:K00306	Q9SJA7	1491	6.1e-164	Probable sarcosine oxidase OS=Arabidopsis thaliana OX=3702 GN=At2g24580 PE=2 SV=1	PF13241//PF12831//PF02737//PF01593//PF01134//PF00070//PF01266//PF01494//PF07992	Putative NAD(P)-binding//FAD dependent oxidoreductase//3-hydroxyacyl-CoA dehydrogenase, NAD binding domain//Flavin containing amine oxidoreductase//Glucose inhibited division protein A//Pyridine nucleotide-disulphide oxidoreductase//FAD dependent oxidoreductase//FAD binding domain//Pyridine nucleotide-disulphide oxidoreductase	GO:0006552//GO:0006633//GO:0006779//GO:0008033//GO:0006550//GO:0055114//GO:0006574//GO:0006568//GO:0018874//GO:0019354//GO:0006631//GO:0006554	leucine catabolic process//fatty acid biosynthetic process//porphyrin-containing compound biosynthetic process//tRNA processing//isoleucine catabolic process//oxidation-reduction process//valine catabolic process//tryptophan metabolic process//benzoate metabolic process//siroheme biosynthetic process//fatty acid metabolic process//lysine catabolic process	GO:0016491//GO:0071949//GO:0003857//GO:0043115//GO:0050660	oxidoreductase activity//FAD binding//3-hydroxyacyl-CoA dehydrogenase activity//precorrin-2 dehydrogenase activity//flavin adenine dinucleotide binding	--	--	KOG2820	FAD-dependent oxidoreductase	DOWN	-1.2466	1.8566e-89	blast,frame:3 start:102 end:1421	Category 4
Cluster-6671.9436	921	970	1069	3263	3819	3535	16.14	15.54	15.92	38.25	42.59	45.21	3814	3496406	XP_008226684.1	3728	0	PREDICTED: receptor-like protein kinase THESEUS 1 isoform X1 [Prunus mume]	XM_016793211.1	XM_016793211	3568	0	PREDICTED: Prunus mume receptor-like protein kinase THESEUS 1 (LOC103326255), transcript variant X2, mRNA	--	--	--	--	Q9LK35	2860	0	Receptor-like protein kinase THESEUS 1 OS=Arabidopsis thaliana OX=3702 GN=THE1 PE=1 SV=1	PF03144//PF07973//PF00046//PF07714//PF00069	Elongation factor Tu domain 2//Threonyl and Alanyl tRNA synthetase second additional domain//Homeobox domain//Protein tyrosine kinase//Protein kinase domain	GO:0006468//GO:0043039	protein phosphorylation//tRNA aminoacylation	GO:0003677//GO:0005525//GO:0004672//GO:0005524//GO:0016876	DNA binding//GTP binding//protein kinase activity//ATP binding//ligase activity, forming aminoacyl-tRNA and related compounds	--	--	--	--	DOWN	-1.4767	2.2747e-78	blast,frame:-3 start:2972 end:432	Category 4
Cluster-6671.9720	806	795	890	2937	3508	3356.01	14.96	13.48	14.03	36.43	41.4	45.42	3619	9083233	XP_021817162.1	3163	0	receptor-like kinase TMK4 [Prunus avium]	XM_008224515.1	XM_008224515	2356	0	PREDICTED: Prunus mume receptor-like kinase TMK4 (LOC103322588), mRNA	--	--	--	--	Q9LK43	1951	5.8e-217	Receptor-like kinase TMK4 OS=Arabidopsis thaliana OX=3702 GN=TMK4 PE=1 SV=1	PF07714//PF13855//PF00560//PF00069	Protein tyrosine kinase//Leucine rich repeat//Leucine Rich Repeat//Protein kinase domain	GO:0006468	protein phosphorylation	GO:0004672//GO:0005524//GO:0005515	protein kinase activity//ATP binding//protein binding	--	--	--	--	DOWN	-1.6095	1.2253e-73	blast,frame:1 start:1 end:2466	Category 4
Cluster-6671.9905	5414.98	5682	6248	17619.9	16836.5	14644.7	164.98	157.61	161.26	357.23	324.58	324.08	2319	3494101	XP_008223483.1	1967	1.1e-217	PREDICTED: S-adenosylmethionine synthase 5 [Prunus mume]	XM_008225261.1	XM_008225261	1513	0	PREDICTED: Prunus mume S-adenosylmethionine synthase 5 (LOC103323276), mRNA	K00789	metK	S-adenosylmethionine synthetase	http://www.genome.jp/dbget-bin/www_bget?ko:K00789	A7Q0V4	1920	1.5e-213	S-adenosylmethionine synthase 5 OS=Vitis vinifera OX=29760 GN=METK5 PE=3 SV=1	PF02773//PF02772//PF00985//PF00438	S-adenosylmethionine synthetase, C-terminal domain//S-adenosylmethionine synthetase, central domain//Merozoite Surface Antigen 2 (MSA-2) family//S-adenosylmethionine synthetase, N-terminal domain	GO:0006556//GO:0006555//GO:0007155	S-adenosylmethionine biosynthetic process//methionine metabolic process//cell adhesion	GO:0004478	methionine adenosyltransferase activity	--	--	KOG1506	S-adenosylmethionine synthetase	DOWN	-1.1343	2.4924e-60	blast,frame:-3 start:1558 end:374	Category 4
Cluster-6671.9949	1762.99	1773.59	1996.26	6007.88	6854.91	5825.89	19.08	17.57	18.38	43.6	47.34	46.12	5995	3504028	XP_008237402.1	1092	8.5e-116	PREDICTED: uncharacterized aarF domain-containing protein kinase At1g71810, chloroplastic isoform X1 [Prunus mume]	XM_008239180.2	XM_008239180	911	0	PREDICTED: Prunus mume uncharacterized aarF domain-containing protein kinase At1g71810, chloroplastic (LOC103336150), transcript variant X1, mRNA	K08869	ADCK, ABC1	aarF domain-containing kinase	http://www.genome.jp/dbget-bin/www_bget?ko:K08869	Q94BU1	690	1.6e-70	Uncharacterized aarF domain-containing protein kinase At1g71810, chloroplastic OS=Arabidopsis thaliana OX=3702 GN=At1g71810 PE=1 SV=1	PF10717//PF00069	Occlusion-derived virus envelope protein ODV-E18//Protein kinase domain	GO:0006468	protein phosphorylation	GO:0005524//GO:0004672	ATP binding//protein kinase activity	GO:0019031	viral envelope	--	--	DOWN	-1.3868	1.4507e-96	blast,frame:-3 start:4760 end:4308|blast,frame:-2 start:3312 end:2860	Category 4
