# Supplementary material for: Transcriptomic analysis reveals candidate genes for male sterility in Prunus sibirica
Source: PeerJ. 2021 Oct 20;9:e12349. doi: 10.7717/peerj.12349 (PMC8541319; doi:10.7717/peerj.12349)
Supplement: Supplemental Information 10 [file peerj-09-12349-s010.xls]

## Sheet: Sheet1
Table S7 Physiological indexes between MSFBs and MFFBs
Raw data of physiological indexes
Stage		Soluble sugars(mg/g)	Starch(mg/g)	Soluble protein(mg/gFW)
Microspore stage	Male sterile flower buds	17.66	5.17	2.66
		18.79	5.25	2.91
		20.61	4.76	2.94
	Fertile flower buds	21.4	11.2	7.57
		22.39	9.43	7.19
		22.73	11.38	7.78
Pollen maturity stage	Male sterile flower buds	20.32	11.4	2.6
		19.34	10.37	2.65
		21.02	10.54	2.65
	Fertile flower buds	24.93	7.08	3.9
		25.29	6.94	3.51
		25.31	6.32	3.84
Processed data of physiological indexes
Stage		Soluble sugars(mg/g)	Starch(mg/g)	Soluble protein(mg/gFW)
Microspore stage	Male sterile flower buds	19.02±1.49Ab	5.06±0.26Bb	2.84±0.15Bb
	Fertile flower buds	22.17±0.69Aa	10.67±1.08Aa	7.51±0.30Aa
Pollen maturity stage	Male sterile flower buds	20.23±0.84Ab	10.77±0.55Aa	2.63±0.03Bb
	Fertile flower buds	25.18±0.21Aa	6.78±0.40Bb	3.75±0.21Aa
