# Supplementary material for: Transcriptomic analysis reveals candidate genes for male sterility in Prunus sibirica
Source: PeerJ. 2021 Oct 20;9:e12349. doi: 10.7717/peerj.12349 (PMC8541319; doi:10.7717/peerj.12349)
Supplement: Supplemental Information 11 [file peerj-09-12349-s011.xlsx]

## Sheet: Sheet1
Table S8 Detailed information of differentially expressed genes in KEGG pathway enrichment analysis
gene_id	sample_readcount(MSFB_1)	sample_readcount(MSFB_2)	sample_readcount(MSFB_3)	sample_readcount(MFFB_1)	sample_readcount(MFFB_2)	sample_readcount(MFFB_3)	sample_fpkm(MSFB_1)	sample_fpkm(MSFB_2)	sample_fpkm(MSFB_3)	sample_fpkm(MFFB_1)	sample_fpkm(MFFB_2)	sample_fpkm(MFFB_3)	Gene Length	NR GI	NR ID	NR Score	NR Evalue	NR Description	NT GI	NT ID	NT Score	NT Evalue	NT Description	KO ID	KO Name	KO Description	Http Link	Swissprot ID	Swissprot Score	Swissprot Evalue	Swissprot Description	PFAM ID	PFAM description	Gene Ontology Biological Pathway	BP Description	Gene Ontology Molecular Function	MF Description	Gene Ontology Cellular Component	CC Description	KOG ID	KOG Description	UP_DOWN_REGULATION(MSFBvsMFFB)	log2FC(MSFBvsMFFB)	q value(MSFBvsMFFB)	CDS_flag	Category
Cluster-6671.10578	1798	1787	2076.05	7368.18	6930.44	6116.74	57.45	51.96	56.17	156.56	140.02	141.87	2225	6126464	XP_015885016.1	2054	8.8e-228	PREDICTED: UDP-glucuronate 4-epimerase 1 [Ziziphus jujuba]	XM_008225351.1	XM_008225351	1648	0	PREDICTED: Prunus mume UDP-glucuronate 4-epimerase 1 (LOC103323359), mRNA	K08679	E5.1.3.6	UDP-glucuronate 4-epimerase	http://www.genome.jp/dbget-bin/www_bget?ko:K08679	Q9M0B6	1949	6.1e-217	UDP-glucuronate 4-epimerase 1 OS=Arabidopsis thaliana OX=3702 GN=GAE1 PE=1 SV=1	PF00106//PF01370//PF01073//PF02919//PF02533//PF08241	short chain dehydrogenase//NAD dependent epimerase/dehydratase family//3-beta hydroxysteroid dehydrogenase/isomerase family//Eukaryotic DNA topoisomerase I, DNA binding fragment//Photosystem II 4 kDa reaction centre component//Methyltransferase domain	GO:0008152//GO:0006265//GO:0055114//GO:0008210//GO:0006694//GO:0015979//GO:0008209//GO:0008207	metabolic process//DNA topological change//oxidation-reduction process//estrogen metabolic process//steroid biosynthetic process//photosynthesis//androgen metabolic process//C21-steroid hormone metabolic process	GO:0003854//GO:0050662//GO:0008168//GO:0003824//GO:0003917//GO:0016491//GO:0003677//GO:0016616	3-beta-hydroxy-delta5-steroid dehydrogenase activity//coenzyme binding//methyltransferase activity//catalytic activity//DNA topoisomerase type I activity//oxidoreductase activity//DNA binding//oxidoreductase activity, acting on the CH-OH group of donors, NAD or NADP as acceptor	GO:0009523//GO:0009539//GO:0005694	photosystem II//photosystem II reaction center//chromosome	KOG1371	UDP-glucose 4-epimerase/UDP-sulfoquinovose synthase	DOWN	-1.4841	1.1979e-80	blast,frame:2 start:11 end:1477	Category 1
Cluster-6671.12654	1927	2065	2246	6277	6863	5710	48.75	47.63	48.18	105.87	110.1	105.1	2733	3494512	XP_008224054.1	2904	0	PREDICTED: beta-amylase 1, chloroplastic [Prunus mume]	XM_008225832.2	XM_008225832	2235	0	PREDICTED: Prunus mume beta-amylase 1, chloroplastic (LOC103323813), mRNA	K01177	E3.2.1.2	beta-amylase	http://www.genome.jp/dbget-bin/www_bget?ko:K01177	Q9LIR6	2270	4.5e-254	Beta-amylase 1, chloroplastic OS=Arabidopsis thaliana OX=3702 GN=BAM1 PE=1 SV=1	PF01373//PF02449	Glycosyl hydrolase family 14//Beta-galactosidase	GO:0005985//GO:0006012//GO:0000272//GO:0046486//GO:0006027//GO:0006687//GO:0005982//GO:0005975	sucrose metabolic process//galactose metabolic process//polysaccharide catabolic process//glycerolipid metabolic process//glycosaminoglycan catabolic process//glycosphingolipid metabolic process//starch metabolic process//carbohydrate metabolic process	GO:0004565//GO:0016161	beta-galactosidase activity//beta-amylase activity	GO:0009341	beta-galactosidase complex	--	--	DOWN	-1.2268	5.3814e-83	blast,frame:-3 start:2338 end:503	Category 1
Cluster-6671.3208	1646.94	1865.04	1887.9	1068	1143.03	948.56	57.76	59.48	56.04	24.88	25.32	24.13	2053	7852968	ONI03552.1	1301	1.7e-140	hypothetical protein PRUPE_6G264400 [Prunus persica]	XM_008241931.1	XM_008241931	799	0	PREDICTED: Prunus mume probable proteasome inhibitor (LOC103338695), mRNA	K06700	PSMF1	proteasome inhibitor subunit 1 (PI31)	http://www.genome.jp/dbget-bin/www_bget?ko:K06700	Q9M330	754	2.1e-78	Probable proteasome inhibitor OS=Arabidopsis thaliana OX=3702 GN=At3g53970 PE=1 SV=1	PF03600	Citrate transporter	GO:0055085	transmembrane transport	--	--	GO:0016021	integral component of membrane	--	--	UP	1.1419	4.3096e-47	blast,frame:3 start:1638 end:1727	Category 1
Cluster-6671.4606	274	290	261	1296	1313	1130	7.3	7.04	5.89	23.01	22.17	21.89	2610	7843386	ONH93969.1	1635	4e-179	hypothetical protein PRUPE_8G263900 [Prunus persica]	XM_008236898.2	XM_008236898	986	0	PREDICTED: Prunus mume probable pectinesterase/pectinesterase inhibitor 7 (LOC103333986), mRNA	K01051	E3.1.1.11	pectinesterase	http://www.genome.jp/dbget-bin/www_bget?ko:K01051	Q9SRX4	1041	1.4e-111	Probable pectinesterase/pectinesterase inhibitor 7 OS=Arabidopsis thaliana OX=3702 GN=PME7 PE=2 SV=1	PF04043//PF01095//PF15462	Plant invertase/pectin methylesterase inhibitor//Pectinesterase//Bartter syndrome, infantile, with sensorineural deafness (Barttin)	GO:0042545//GO:0005985//GO:0005982//GO:0006821	cell wall modification//sucrose metabolic process//starch metabolic process//chloride transport	GO:0004857//GO:0030599	enzyme inhibitor activity//pectinesterase activity	GO:0005618	cell wall	--	--	DOWN	-1.8083	8.563e-60	blast,frame:-1 start:2409 end:1300|blast,frame:-2 start:1199 end:486	Category 1
Cluster-6671.6276	125	129	159	477	507	410	14.11	12.95	14.94	34.73	34.98	32.66	840	3508501	XP_008243586.1	1121	5.1e-120	PREDICTED: beta-glucosidase 12-like [Prunus mume]	XM_008245364.1	XM_008245364	810	0	PREDICTED: Prunus mume beta-glucosidase 12-like (LOC103341809), mRNA	K01188	E3.2.1.21	beta-glucosidase	http://www.genome.jp/dbget-bin/www_bget?ko:K01188	Q5Z9Z0	693	1e-71	Beta-glucosidase 24 OS=Oryza sativa subsp. japonica OX=39947 GN=BGLU24 PE=2 SV=1	PF00232	Glycosyl hydrolase family 1	GO:0005975	carbohydrate metabolic process	GO:0004553	hydrolase activity, hydrolyzing O-glycosyl compounds	--	--	--	--	DOWN	-1.3881	1.2232e-20	blast,frame:-3 start:838 end:200	Category 1
Cluster-6671.6372	7793.28	8624.16	8927	3407.76	3773	3350.05	135.83	137.36	132.16	39.72	41.84	42.61	3834	10535254	PON66060.1	3650	0	Sucrose synthase [Parasponia andersonii]	XM_007204588.1	XM_007204588	2414	0	Prunus persica hypothetical protein (PRUPE_ppa001535mg) mRNA, complete cds	K00695	E2.4.1.13	sucrose synthase	http://www.genome.jp/dbget-bin/www_bget?ko:K00695	P13708	3507	0	Sucrose synthase OS=Glycine max OX=3847 GN=SS PE=1 SV=2	PF00156//PF00862//PF03533	Phosphoribosyl transferase domain//Sucrose synthase//SPO11 homologue	GO:0005985//GO:0005982//GO:0007131//GO:0009116	sucrose metabolic process//starch metabolic process//reciprocal meiotic recombination//nucleoside metabolic process	GO:0003677//GO:0016157	DNA binding//sucrose synthase activity	--	--	--	--	UP	1.6345	2.2379e-166	estscan,start:2756 end:233; minus strand	Category 1
Cluster-6671.7573	1447.42	1710.41	1729.46	924.87	986.63	880.09	33.28	35.89	33.74	14.19	14.4	14.74	2977	2681525	AHC04401.1	1627	3.9e-178	beta-glucosidase 1 [Fragaria x ananassa]	XM_016791841.1	XM_016791841	1149	0	PREDICTED: Prunus mume beta-glucosidase 40-like (LOC103321488), mRNA	K01188	E3.2.1.21	beta-glucosidase	http://www.genome.jp/dbget-bin/www_bget?ko:K01188	Q9FZE0	1503	4.2e-165	Beta-glucosidase 40 OS=Arabidopsis thaliana OX=3702 GN=BGLU40 PE=2 SV=1	PF16053//PF00232//PF00150	Mitochondrial 28S ribosomal protein S34//Glycosyl hydrolase family 1//Cellulase (glycosyl hydrolase family 5)	GO:0005975//GO:0042254	carbohydrate metabolic process//ribosome biogenesis	GO:0003735//GO:0004553	structural constituent of ribosome//hydrolase activity, hydrolyzing O-glycosyl compounds	GO:0005840//GO:0005739	ribosome//mitochondrion	--	--	UP	1.1731	6.2423e-47	blast,frame:1 start:439 end:1623	Category 1
Cluster-6671.8055	296	356	398	1263	1475	1255	9.41	10.3	10.71	26.7	29.65	28.96	2235	10538143	PON68949.1	2327	2e-259	UDP-glucose 6-dehydrogenase type [Parasponia andersonii]	XM_008241818.1	XM_008241818	1598	0	PREDICTED: Prunus mume UDP-glucose 6-dehydrogenase 5 (LOC103338599), transcript variant X1, mRNA	K00012	UGDH, ugd	UDPglucose 6-dehydrogenase	http://www.genome.jp/dbget-bin/www_bget?ko:K00012	Q2QS13	2322	3.4e-260	UDP-glucose 6-dehydrogenase 5 OS=Oryza sativa subsp. japonica OX=39947 GN=UGD5 PE=2 SV=1	PF03446//PF03720//PF03721//PF00984	NAD binding domain of 6-phosphogluconate dehydrogenase//UDP-glucose/GDP-mannose dehydrogenase family, UDP binding domain//UDP-glucose/GDP-mannose dehydrogenase family, NAD binding domain//UDP-glucose/GDP-mannose dehydrogenase family, central domain	GO:0019521//GO:0055114//GO:0006098	D-gluconate metabolic process//oxidation-reduction process//pentose-phosphate shunt	GO:0051287//GO:0016616//GO:0004616	NAD binding//oxidoreductase activity, acting on the CH-OH group of donors, NAD or NADP as acceptor//phosphogluconate dehydrogenase (decarboxylating) activity	--	--	KOG2666	UDP-glucose/GDP-mannose dehydrogenase	DOWN	-1.5623	2.9535e-54	blast,frame:-3 start:1687 end:236	Category 1
Cluster-10297.0	56	51.13	53.11	10.61	5.65	7.19	1.94	1.61	1.56	0.24	0.12	0.18	2071	--	--	--	--	--	XM_008231626.2	XM_008231626	1406	0	PREDICTED: Prunus mume exopolygalacturonase-like (LOC103329197), mRNA	K01213	E3.2.1.67	galacturan 1,4-alpha-galacturonidase	http://www.genome.jp/dbget-bin/www_bget?ko:K01213	P24548	1201	3.1e-130	Exopolygalacturonase (Fragment) OS=Oenothera organensis OX=3945 PE=2 SV=1	PF00295	Glycosyl hydrolases family 28	GO:0005985//GO:0005982//GO:0005975	sucrose metabolic process//starch metabolic process//carbohydrate metabolic process	GO:0004650	polygalacturonase activity	--	--	--	--	UP	3.1064	5.4183e-11	blast,frame:1 start:649 end:1875	Category 2
Cluster-1342.0	21	18	25	5	14	9	1.18	0.92	1.19	0.19	0.49	0.36	1389	10532790	PON63596.1	1343	1.5e-145	Glycoside hydrolase [Parasponia andersonii]	XM_019000937.1	XM_019000937	54	7.79722e-17	PREDICTED: Juglans regia exopolygalacturonase-like (LOC109018756), partial mRNA	K01213	E3.2.1.67	galacturan 1,4-alpha-galacturonidase	http://www.genome.jp/dbget-bin/www_bget?ko:K01213	Q39786	1008	4.9e-108	Polygalacturonase OS=Gossypium hirsutum OX=3635 GN=G9 PE=2 SV=1	PF00295	Glycosyl hydrolases family 28	GO:0005982//GO:0005985//GO:0005975	starch metabolic process//sucrose metabolic process//carbohydrate metabolic process	GO:0004650	polygalacturonase activity	--	--	--	--	UP	1.5693	0.020125	blast,frame:3 start:3 end:1313	Category 2
Cluster-1949.0	0	0	0	6	2	8	0	0	0	1.07	0.33	1.56	498	--	--	--	--	--	XM_007207638.1	XM_007207638	467	0	Prunus persica hypothetical protein (PRUPE_ppa024193mg) mRNA, partial cds	K01188	E3.2.1.21	beta-glucosidase	http://www.genome.jp/dbget-bin/www_bget?ko:K01188	Q5Z9Z0	474	1.5e-46	Beta-glucosidase 24 OS=Oryza sativa subsp. japonica OX=39947 GN=BGLU24 PE=2 SV=1	PF00232	Glycosyl hydrolase family 1	GO:0005975	carbohydrate metabolic process	GO:0004553	hydrolase activity, hydrolyzing O-glycosyl compounds	--	--	--	--	DOWN	-4.5244	0.035674	estscan,start:350 end:1; minus strand	Category 2
Cluster-2681.0	157	145	175	78	78	74	7.69	6.43	7.24	2.53	2.4	2.62	1553	8257858	XP_007222445.2	2321	6.8e-259	LOW QUALITY PROTEIN: pentatricopeptide repeat-containing protein At2g04860 [Prunus persica]	XM_016791999.1	XM_016791999	1414	0	PREDICTED: Prunus mume alpha-amylase (LOC103320333), mRNA	K01176	E3.2.1.1, amyA, malS	alpha-amylase	http://www.genome.jp/dbget-bin/www_bget?ko:K01176	P17859	1515	9e-167	Alpha-amylase OS=Vigna mungo OX=3915 GN=AMY1.1 PE=2 SV=1	PF02324//PF07821//PF00128	Glycosyl hydrolase family 70//Alpha-amylase C-terminal beta-sheet domain//Alpha amylase, catalytic domain	GO:0005985//GO:0009250//GO:0005982//GO:0005975	sucrose metabolic process//glucan biosynthetic process//starch metabolic process//carbohydrate metabolic process	GO:0004556//GO:0046527//GO:0043169//GO:0003824//GO:0005509	alpha-amylase activity//glucosyltransferase activity//cation binding//catalytic activity//calcium ion binding	--	--	--	--	UP	1.4192	3.8988e-11	estscan,start:1 end:1284	Category 2
Cluster-3227.0	1	0	3	13	15	7	0.12	0	0.29	0.97	1.06	0.57	824	4014795	XP_009337307.1	1157	3.4e-124	PREDICTED: uncharacterized protein LOC103929797 [Pyrus x bretschneideri]	XM_007219989.1	XM_007219989	775	0	Prunus persica hypothetical protein (PRUPE_ppa026252mg) mRNA, complete cds	K05349	bglX	beta-glucosidase	http://www.genome.jp/dbget-bin/www_bget?ko:K05349	Q56078	277	1.7e-23	Periplasmic beta-glucosidase OS=Salmonella typhimurium (strain LT2 / SGSC1412 / ATCC 700720) OX=99287 GN=bglX PE=3 SV=2	PF01915	Glycosyl hydrolase family 3 C-terminal domain	GO:0005975	carbohydrate metabolic process	GO:0004553	hydrolase activity, hydrolyzing O-glycosyl compounds	--	--	--	--	DOWN	-2.7654	0.038992	estscan,start:824 end:20; minus strand	Category 2
Cluster-3442.0	3	1	0	46	38	39	0.13	0.04	0	1.29	1.01	1.19	1756	--	--	--	--	--	XM_016794340.1	XM_016794340	1518	0	PREDICTED: Prunus mume probable hexokinase-like 2 protein (LOC103335653), mRNA	K00844	HK	hexokinase	http://www.genome.jp/dbget-bin/www_bget?ko:K00844	Q9T071	1206	6.9e-131	Probable hexokinase-like 2 protein OS=Arabidopsis thaliana OX=3702 GN=At4g37840 PE=3 SV=1	PF03727//PF02444//PF00349	Hexokinase//Hepatitis E virus ORF-2 (Putative capsid protein)//Hexokinase	GO:0005975	carbohydrate metabolic process	GO:0005524//GO:0016773	ATP binding//phosphotransferase activity, alcohol group as acceptor	GO:0030430	host cell cytoplasm	KOG1369	Hexokinase	DOWN	-4.5668	6.7808e-07	blast,frame:-3 start:1754 end:195	Category 2
Cluster-3929.0	92.98	124	140	26	20	26	3.06	3.71	3.9	0.57	0.42	0.62	2170	--	--	--	--	--	XM_016792305.1	XM_016792305	386	0	PREDICTED: Prunus mume probable proteasome inhibitor (LOC107880535), mRNA	K06700	PSMF1	proteasome inhibitor subunit 1 (PI31)	http://www.genome.jp/dbget-bin/www_bget?ko:K06700	Q9M330	310	6.7e-27	Probable proteasome inhibitor OS=Arabidopsis thaliana OX=3702 GN=At3g53970 PE=1 SV=1	--	--	--	--	--	--	--	--	--	--	UP	2.6632	3.8454e-19	estscan,start:1579 end:1967	Category 2
Cluster-6642.1	1	3	0	7	17	11	0.16	0.42	0	0.71	1.62	1.21	680	--	--	--	--	--	XM_007207019.1	XM_007207019	641	0	Prunus persica hypothetical protein (PRUPE_ppa024434mg) mRNA, complete cds	K01188	E3.2.1.21	beta-glucosidase	http://www.genome.jp/dbget-bin/www_bget?ko:K01188	Q7XKV2	780	6.6e-82	Beta-glucosidase 13 OS=Oryza sativa subsp. japonica OX=39947 GN=BGLU13 PE=2 SV=2	PF00232	Glycosyl hydrolase family 1	GO:0005975	carbohydrate metabolic process	GO:0004553	hydrolase activity, hydrolyzing O-glycosyl compounds	--	--	--	--	DOWN	-2.7375	0.042037	blast,frame:-1 start:677 end:3	Category 2
Cluster-6671.1203	9	5	9	0	0	0	1.64	0.8	1.35	0	0	0	629	3508940	XP_008244214.1	276	3.7e-22	PREDICTED: putative pectinesterase 63 [Prunus mume]	XM_008245992.1	XM_008245992	166	1.88154e-79	PREDICTED: Prunus mume putative pectinesterase 63 (LOC103342367), mRNA	K01051	E3.1.1.11	pectinesterase	http://www.genome.jp/dbget-bin/www_bget?ko:K01051	Q84WM7	166	9.7e-11	Pectinesterase PPME1 OS=Arabidopsis thaliana OX=3702 GN=PPME1 PE=1 SV=1	--	--	--	--	--	--	--	--	--	--	UP	5.7523	0.00082355	blast,frame:-3 start:612 end:406	Category 2
Cluster-6671.13143	324	337	396	196.5	198.01	204	8.15	7.73	8.45	3.3	3.16	3.74	2746	6530838	XP_016652118.1	1054	9.9e-112	PREDICTED: beta-glucosidase 12-like [Prunus mume]	XM_007202070.1	XM_007202070	1107	0	Prunus persica hypothetical protein (PRUPE_ppa006110mg) mRNA, complete cds	K01188	E3.2.1.21	beta-glucosidase	http://www.genome.jp/dbget-bin/www_bget?ko:K01188	P26205	772	2.3e-80	Cyanogenic beta-glucosidase (Fragment) OS=Trifolium repens OX=3899 GN=LI PE=1 SV=1	PF00232	Glycosyl hydrolase family 1	GO:0005975	carbohydrate metabolic process	GO:0004553	hydrolase activity, hydrolyzing O-glycosyl compounds	--	--	--	--	UP	1.1839	5.3455e-16	blast,frame:1 start:2113 end:2238|blast,frame:3 start:2079 end:2453|blast,frame:2 start:488 end:1192	Category 2
Cluster-6671.17858	105	125	150	371	392	318.62	3.19	3.46	3.86	7.5	7.54	7.03	2325	8275702	XP_007201179.2	1574	4.2e-172	pectinesterase [Prunus persica]	XM_008236899.2	XM_008236899	1213	0	PREDICTED: Prunus mume pectinesterase-like (LOC103333987), mRNA	K01051	E3.1.1.11	pectinesterase	http://www.genome.jp/dbget-bin/www_bget?ko:K01051	O81301	558	1.3e-55	Probable pectinesterase/pectinesterase inhibitor 40 OS=Arabidopsis thaliana OX=3702 GN=PME40 PE=2 SV=1	PF01095//PF04043	Pectinesterase//Plant invertase/pectin methylesterase inhibitor	GO:0042545//GO:0005985//GO:0005982	cell wall modification//sucrose metabolic process//starch metabolic process	GO:0030599//GO:0004857	pectinesterase activity//enzyme inhibitor activity	GO:0005618	cell wall	--	--	DOWN	-1.1456	3.4125e-12	blast,frame:2 start:146 end:1384	Category 2
Cluster-6671.1923	52	46	35	15	24	22	3.02	2.42	1.71	0.57	0.87	0.92	1355	8971290	XP_021687877.1	1498	1.6e-163	UDP-glucuronate 4-epimerase 3-like [Hevea brasiliensis]	XM_008236150.2	XM_008236150	1273	0	PREDICTED: Prunus mume UDP-glucuronate 4-epimerase 4-like (LOC103333329), mRNA	K08679	E5.1.3.6	UDP-glucuronate 4-epimerase	http://www.genome.jp/dbget-bin/www_bget?ko:K08679	O22141	1423	3.6e-156	UDP-glucuronate 4-epimerase 4 OS=Arabidopsis thaliana OX=3702 GN=GAE4 PE=1 SV=1	PF01370//PF01073//PF00106	NAD dependent epimerase/dehydratase family//3-beta hydroxysteroid dehydrogenase/isomerase family//short chain dehydrogenase	GO:0008152//GO:0055114//GO:0008209//GO:0006694//GO:0008210//GO:0008207	metabolic process//oxidation-reduction process//androgen metabolic process//steroid biosynthetic process//estrogen metabolic process//C21-steroid hormone metabolic process	GO:0050662//GO:0003854//GO:0016616//GO:0003824//GO:0016491	coenzyme binding//3-beta-hydroxy-delta5-steroid dehydrogenase activity//oxidoreductase activity, acting on the CH-OH group of donors, NAD or NADP as acceptor//catalytic activity//oxidoreductase activity	--	--	KOG1371	UDP-glucose 4-epimerase/UDP-sulfoquinovose synthase	UP	1.5081	0.0007563	blast,frame:-2 start:1354 end:65	Category 2
Cluster-6671.19586	6	19	9	157	202	158	0.17	0.48	0.21	2.91	3.56	3.19	2513	3509965	XP_008245938.1	4139	0	PREDICTED: probable beta-D-xylosidase 5 [Prunus mume]	XM_008247716.2	XM_008247716	2439	0	PREDICTED: Prunus mume probable beta-D-xylosidase 5 (LOC103344088), mRNA	K15920	XYL4	beta-D-xylosidase 4	http://www.genome.jp/dbget-bin/www_bget?ko:K15920	Q9LJN4	2006	1.7e-223	Probable beta-D-xylosidase 5 OS=Arabidopsis thaliana OX=3702 GN=BXL5 PE=2 SV=2	PF00933//PF01915	Glycosyl hydrolase family 3 N terminal domain//Glycosyl hydrolase family 3 C-terminal domain	GO:0005975	carbohydrate metabolic process	GO:0004553	hydrolase activity, hydrolyzing O-glycosyl compounds	--	--	--	--	DOWN	-3.5573	4.9751e-24	blast,frame:-1 start:2498 end:66	Category 2
Cluster-6671.19761	206	219.99	254	855	931	854	3.32	3.24	3.48	9.22	9.55	10.04	4124	7866070	ONI16654.1	3897	0	hypothetical protein PRUPE_3G113100 [Prunus persica]	XM_008230727.2	XM_008230727	2307	0	PREDICTED: Prunus mume probable alpha,alpha-trehalose-phosphate synthase [UDP-forming] 7 (LOC103328334), mRNA	K16055	TPS	trehalose 6-phosphate synthase/phosphatase	http://www.genome.jp/dbget-bin/www_bget?ko:K16055	Q9LMI0	3175	0	Probable alpha,alpha-trehalose-phosphate synthase [UDP-forming] 7 OS=Arabidopsis thaliana OX=3702 GN=TPS7 PE=1 SV=1	PF00982//PF02358	Glycosyltransferase family 20//Trehalose-phosphatase	GO:0005992	trehalose biosynthetic process	GO:0003824	catalytic activity	--	--	--	--	DOWN	-1.5923	5.8784e-44	blast,frame:2 start:824 end:3169	Category 2
Cluster-6671.20602	430	534	551	2	5	4	16.35	18.44	17.71	0.05	0.12	0.11	1917	3493923	XP_008223247.1	2067	2.4e-229	PREDICTED: exopolygalacturonase-like [Prunus mume]	XM_008225025.2	XM_008225025	1819	0	PREDICTED: Prunus mume exopolygalacturonase-like (LOC103323064), mRNA	K01213	E3.2.1.67	galacturan 1,4-alpha-galacturonidase	http://www.genome.jp/dbget-bin/www_bget?ko:K01213	P49062	883	2.1e-93	Exopolygalacturonase clone GBGE184 OS=Arabidopsis thaliana OX=3702 GN=PGA3 PE=2 SV=1	PF00295	Glycosyl hydrolases family 28	GO:0005985//GO:0005982//GO:0005975	sucrose metabolic process//starch metabolic process//carbohydrate metabolic process	GO:0004650	polygalacturonase activity	--	--	--	--	UP	7.4703	8.3247e-59	blast,frame:1 start:82 end:1377	Category 2
Cluster-6671.3712	8	9	16	58	34	37	0.28	0.29	0.48	1.37	0.76	0.96	2026	6530798	XP_016652080.1	2977	0	PREDICTED: beta-fructofuranosidase, insoluble isoenzyme 3-like [Prunus mume]	XM_016796594.1	XM_016796594	1687	0	PREDICTED: Prunus mume beta-fructofuranosidase, insoluble isoenzyme 3-like (LOC103341883), mRNA	K01193	E3.2.1.26, sacA	beta-fructofuranosidase	http://www.genome.jp/dbget-bin/www_bget?ko:K01193	Q39693	2050	1.1e-228	Beta-fructofuranosidase, insoluble isoenzyme 3 OS=Daucus carota OX=4039 GN=INV3 PE=3 SV=1	--	--	--	--	--	--	--	--	--	--	DOWN	-1.6193	0.0033335	blast,frame:-2 start:1881 end:28	Category 2
Cluster-6671.3811	0	0	1	16.96	17	5	0	0	0.27	3.46	3.26	1.12	467	9088271	XP_021822765.1	294	2.2e-24	26S proteasome non-ATPase regulatory subunit 12 homolog A-like [Prunus avium]	XM_008247120.2	XM_008247120	172	6.32563e-83	PREDICTED: Prunus mume 26S proteasome non-ATPase regulatory subunit 12 homolog A-like (LOC103343468), mRNA	K03035	PSMD12, RPN5	26S proteasome regulatory subunit N5	http://www.genome.jp/dbget-bin/www_bget?ko:K03035	Q8VWK0	262	5.3e-22	26S proteasome non-ATPase regulatory subunit 12 homolog B OS=Arabidopsis thaliana OX=3702 GN=RPN5B PE=1 SV=1	--	--	--	--	--	--	--	--	KOG1498	26S proteasome regulatory complex, subunit RPN5/PSMD12	DOWN	-4.7906	0.0043769	estscan,start:467 end:87; minus strand	Category 2
Cluster-6671.431	11	5	9	0	0	1	2.34	0.92	1.56	0	0	0.15	579	7871578	ONI22162.1	708	2.7e-72	hypothetical protein PRUPE_2G111300 [Prunus persica]	XM_007218046.1	XM_007218046	443	0	Prunus persica hypothetical protein (PRUPE_ppa006745mg) mRNA, complete cds	K03066	PSMC5, RPT6	26S proteasome regulatory subunit T6	http://www.genome.jp/dbget-bin/www_bget?ko:K03066	Q9C5U3	396	1.9e-37	26S proteasome regulatory subunit 8 homolog A OS=Arabidopsis thaliana OX=3702 GN=RPT6A PE=1 SV=1	PF04977//PF07544	Septum formation initiator//RNA polymerase II transcription mediator complex subunit 9	GO:0007049//GO:0006357	cell cycle//regulation of transcription from RNA polymerase II promoter	GO:0001104	RNA polymerase II transcription cofactor activity	GO:0016592	mediator complex	KOG0728	26S proteasome regulatory complex, ATPase RPT6	UP	4.9184	0.0041234	blast,frame:-2 start:557 end:3	Category 2
Cluster-6671.567	296.01	289	324	58	35	32	11.45	10.15	10.6	1.49	0.85	0.9	1889	--	--	--	--	--	XM_008233101.1	XM_008233101	1069	0	PREDICTED: Prunus mume vicianin hydrolase (LOC103330511), transcript variant X1, mRNA	K01188	E3.2.1.21	beta-glucosidase	http://www.genome.jp/dbget-bin/www_bget?ko:K01188	A2SY66	1094	7.2e-118	Vicianin hydrolase (Fragment) OS=Vicia sativa subsp. nigra OX=3909 PE=1 SV=1	PF00232	Glycosyl hydrolase family 1	GO:0005975	carbohydrate metabolic process	GO:0004553	hydrolase activity, hydrolyzing O-glycosyl compounds	--	--	--	--	UP	3.2294	8.2407e-51	blast,frame:2 start:5 end:436|blast,frame:3 start:711 end:1736|blast,frame:1 start:391 end:636	Category 2
Cluster-6671.6866	132.95	216.98	161	416.8	515	433	2.39	3.57	2.46	5.01	5.89	5.68	3725	3598416	NP_001281029.1	4538	0	probable sucrose-phosphate synthase 1 [Malus domestica]	XM_008221302.2	XM_008221302	3255	0	PREDICTED: Prunus mume probable sucrose-phosphate synthase 1 (LOC103319718), mRNA	K00696	E2.4.1.14	sucrose-phosphate synthase	http://www.genome.jp/dbget-bin/www_bget?ko:K00696	O22060	3796	0	Probable sucrose-phosphate synthase 1 OS=Citrus unshiu OX=55188 GN=SPS1 PE=2 SV=1	PF02468//PF04995//PF01238//PF00862	Photosystem II reaction centre N protein (psbN)//Heme exporter protein D (CcmD)//Phosphomannose isomerase type I//Sucrose synthase	GO:0005982//GO:0017004//GO:0015979//GO:0005975//GO:0015886//GO:0006000//GO:0005985//GO:0006013	starch metabolic process//cytochrome complex assembly//photosynthesis//carbohydrate metabolic process//heme transport//fructose metabolic process//sucrose metabolic process//mannose metabolic process	GO:0016157//GO:0008270//GO:0004476	sucrose synthase activity//zinc ion binding//mannose-6-phosphate isomerase activity	GO:0009539//GO:0009523//GO:0016020//GO:0016021	photosystem II reaction center//photosystem II//membrane//integral component of membrane	--	--	DOWN	-1.0496	8.0444e-10	blast,frame:-3 start:3339 end:331|blast,frame:-2 start:3640 end:3230	Category 2
Cluster-6671.7183	11	22	22.02	310.28	262.46	284	0.32	0.58	0.54	5.98	4.81	5.98	2424	7861869	ONI12453.1	1540	3.8e-168	hypothetical protein PRUPE_4G165800 [Prunus persica]	XM_007214695.1	XM_007214695	563	0	Prunus persica hypothetical protein (PRUPE_ppa024630mg) mRNA, partial cds	K01188	E3.2.1.21	beta-glucosidase	http://www.genome.jp/dbget-bin/www_bget?ko:K01188	B8AVF0	884	2.1e-93	Beta-glucosidase 12 OS=Oryza sativa subsp. indica OX=39946 GN=BGLU12 PE=3 SV=1	PF00232	Glycosyl hydrolase family 1	GO:0005975	carbohydrate metabolic process	GO:0004553	hydrolase activity, hydrolyzing O-glycosyl compounds	--	--	--	--	DOWN	-3.6052	3.3187e-39	blast,frame:2 start:878 end:1021	Category 2
Cluster-6671.7184	0	1	1	15.01	25.99	13	0	0.2	0.18	2.11	3.45	2.01	561	7848645	ONH99228.1	843	5.9e-88	hypothetical protein PRUPE_6G019100 [Prunus persica]	XM_007208411.1	XM_007208411	417	0	Prunus persica hypothetical protein (PRUPE_ppa004108mg) mRNA, complete cds	K01188	E3.2.1.21	beta-glucosidase	http://www.genome.jp/dbget-bin/www_bget?ko:K01188	P26205	696	3e-72	Cyanogenic beta-glucosidase (Fragment) OS=Trifolium repens OX=3899 GN=LI PE=1 SV=1	PF00232//PF06330	Glycosyl hydrolase family 1//Trichodiene synthase (TRI5)	GO:0016114//GO:0005975//GO:0016106	terpenoid biosynthetic process//carbohydrate metabolic process//sesquiterpenoid biosynthetic process	GO:0045482//GO:0004553	trichodiene synthase activity//hydrolase activity, hydrolyzing O-glycosyl compounds	--	--	--	--	DOWN	-4.3789	0.0018359	estscan,start:1 end:561	Category 2
Cluster-8018.0	0	3	2	85	84	65	0	0.14	0.09	2.98	2.8	2.49	1455	3496315	XP_008226539.1	1865	4.8e-206	PREDICTED: polygalacturonase-like [Prunus mume]	XM_008228317.2	XM_008228317	1367	0	PREDICTED: Prunus mume polygalacturonase-like (LOC103326110), mRNA	K01213	E3.2.1.67	galacturan 1,4-alpha-galacturonidase	http://www.genome.jp/dbget-bin/www_bget?ko:K01213	Q39786	549	8.7e-55	Polygalacturonase OS=Gossypium hirsutum OX=3635 GN=G9 PE=2 SV=1	PF00295//PF07552	Glycosyl hydrolases family 28//Spore Coat Protein X and V domain	GO:0030435//GO:0005982//GO:0005985//GO:0005975	sporulation resulting in formation of a cellular spore//starch metabolic process//sucrose metabolic process//carbohydrate metabolic process	GO:0004650	polygalacturonase activity	GO:0031160	spore wall	--	--	DOWN	-5.1835	1.4089e-11	blast,frame:-2 start:1439 end:159	Category 2
Cluster-8243.0	28	28	57	18	23	9	3.87	3.42	6.52	1.59	1.92	0.87	739	7850033	ONI00617.1	281	1.1e-22	hypothetical protein PRUPE_6G098100 [Prunus persica]	--	--	--	--	--	K01051	E3.1.1.11	pectinesterase	http://www.genome.jp/dbget-bin/www_bget?ko:K01051	--	--	--	--	--	--	--	--	--	--	--	--	--	--	UP	1.5398	0.0033538	blast,frame:3 start:330 end:542	Category 2
Cluster-8352.0	36	38	51	1	0	0	4.5	4.21	5.3	0.08	0	0	786	4823419	KJB58447.1	537	2.5e-52	hypothetical protein B456_009G210600 [Gossypium raimondii]	XM_008221977.1	XM_008221977	192	8.37326e-94	PREDICTED: Prunus mume 26S proteasome non-ATPase regulatory subunit 14 homolog (LOC103320312), mRNA	K03030	PSMD14, RPN11, POH1	26S proteasome regulatory subunit N11	http://www.genome.jp/dbget-bin/www_bget?ko:K03030	Q9LT08	524	3.7e-52	26S proteasome non-ATPase regulatory subunit 14 homolog OS=Arabidopsis thaliana OX=3702 GN=RPN11 PE=1 SV=1	--	--	--	--	--	--	--	--	KOG1555	26S proteasome regulatory complex, subunit RPN11	UP	7.2204	7.3184e-08	blast,frame:-3 start:784 end:605|blast,frame:-1 start:504 end:13	Category 2
Cluster-8623.0	5	6	3	21	13	25	0.35	0.38	0.18	0.98	0.57	1.27	1164	7874936	ONI25520.1	1328	7.1e-144	hypothetical protein PRUPE_2G308300 [Prunus persica]	XM_016794538.1	XM_016794538	1074	0	PREDICTED: Prunus mume probable trehalose-phosphate phosphatase C (LOC103333663), transcript variant X3, mRNA	K01087	otsB	trehalose 6-phosphate phosphatase	http://www.genome.jp/dbget-bin/www_bget?ko:K01087	Q9SUW0	758	4e-79	Probable trehalose-phosphate phosphatase G OS=Arabidopsis thaliana OX=3702 GN=TPPG PE=2 SV=1	PF02358//PF14565	Trehalose-phosphatase//Interleukin 22 IL-10-related T-cell-derived-inducible factor	GO:0005992	trehalose biosynthetic process	GO:0003824	catalytic activity	GO:0005576	extracellular region	--	--	DOWN	-1.718	0.045761	blast,frame:3 start:3 end:845	Category 2
Cluster-9191.0	7	3	8	96	87	47	0.36	0.14	0.35	3.27	2.81	1.75	1490	3507528	XP_008242288.1	1863	8.3e-206	PREDICTED: putative pectinesterase 63 [Prunus mume]	XM_008244066.2	XM_008244066	1288	0	PREDICTED: Prunus mume putative pectinesterase 63 (LOC103340629), mRNA	K01051	E3.1.1.11	pectinesterase	http://www.genome.jp/dbget-bin/www_bget?ko:K01051	Q9FKF3	965	5.1e-103	Putative pectinesterase 63 OS=Arabidopsis thaliana OX=3702 GN=PME63 PE=3 SV=2	PF01095	Pectinesterase	GO:0042545//GO:0005985//GO:0005982	cell wall modification//sucrose metabolic process//starch metabolic process	GO:0030599	pectinesterase activity	GO:0005618	cell wall	--	--	DOWN	-3.2987	2.2931e-10	blast,frame:-2 start:367 end:275|blast,frame:-3 start:1488 end:199	Category 2
