# Supplementary material for: Transcriptomic analysis reveals candidate genes for male sterility in Prunus sibirica
Source: PeerJ. 2021 Oct 20;9:e12349. doi: 10.7717/peerj.12349 (PMC8541319; doi:10.7717/peerj.12349)
Supplement: Supplemental Information 12 [file peerj-09-12349-s012.xlsx]

## Sheet: Sheet1
Table S9 Detailed information of candidate genes in RT-qPCR
gene_id	sample_readcount(MSFB_1)	sample_readcount(MSFB_2)	sample_readcount(MSFB_3)	sample_readcount(MFFB_1)	sample_readcount(MFFB_2)	sample_readcount(MFFB_3)	sample_fpkm(MSFB_1)	sample_fpkm(MSFB_2)	sample_fpkm(MSFB_3)	sample_fpkm(MFFB_1)	sample_fpkm(MFFB_2)	sample_fpkm(MFFB_3)	Gene Length	NR GI	NR ID	NR Score	NR Evalue	NR Description	NT GI	NT ID	NT Score	NT Evalue	NT Description	KO ID	KO Name	KO Description	Http Link	Swissprot ID	Swissprot Score	Swissprot Evalue	Swissprot Description	PFAM ID	PFAM description	Gene Ontology Biological Pathway	BP Description	Gene Ontology Molecular Function	MF Description	Gene Ontology Cellular Component	CC Description	KOG ID	KOG Description	UP_DOWN_REGULATION(MSFBvsMFFB)	log2FC(MSFBvsMFFB)	q value(MSFBvsMFFB)	CDS_flag
Cluster-10585.0	39	79	52	2	0	0	1.13	2.09	1.28	0.04	0	0	2421	7881328	ONI31912.1	3513	0	hypothetical protein PRUPE_1G338600 [Prunus persica]	XM_007226282.1	XM_007226282	1912	0	Prunus persica hypothetical protein (PRUPE_ppa022178mg) mRNA, complete cds	--	--	--	--	Q9FMS5	1659	2.8e-183	PHD finger protein MALE STERILITY 1 OS=Arabidopsis thaliana OX=3702 GN=MS1 PE=1 SV=1	PF00628//PF04272	PHD-finger//Phospholamban	GO:0006810//GO:0006816	transport//calcium ion transport	GO:0042030//GO:0005515//GO:0005246	ATPase inhibitor activity//protein binding//calcium channel regulator activity	GO:0016020	membrane	--	--	UP	6.7714	5.9605e-09	blast,frame:-1 start:2361 end:163
Cluster-6671.20011	24484.3	30634.6	27591.7	314	349	274.97	523.43	597.81	500.64	4.48	4.74	4.28	3180	--	--	--	--	--	XM_008242936.1	XM_008242936	769	0	PREDICTED: Prunus mume fatty acyl-CoA reductase 2 (LOC103339612), mRNA	K13356	FAR	fatty acyl-CoA reductase	http://www.genome.jp/dbget-bin/www_bget?ko:K13356	Q08891	678	2.1e-69	Fatty acyl-CoA reductase 2 OS=Arabidopsis thaliana OX=3702 GN=FAR2 PE=1 SV=2	PF00758//PF03015//PF00472//PF02234//PF01073//PF01370	Erythropoietin/thrombopoietin//Male sterility protein//RF-1 domain//Cyclin-dependent kinase inhibitor//3-beta hydroxysteroid dehydrogenase/isomerase family//NAD dependent epimerase/dehydratase family	GO:0006449//GO:0008207//GO:0045859//GO:0008209//GO:0008210//GO:0007050//GO:0006694//GO:0007165//GO:0006415//GO:0055114	regulation of translational termination//C21-steroid hormone metabolic process//regulation of protein kinase activity//androgen metabolic process//estrogen metabolic process//cell cycle arrest//steroid biosynthetic process//signal transduction//translational termination//oxidation-reduction process	GO:0016616//GO:0004861//GO:0005179//GO:0003824//GO:0080019//GO:0003854//GO:0050662//GO:0003747	oxidoreductase activity, acting on the CH-OH group of donors, NAD or NADP as acceptor//cyclin-dependent protein serine/threonine kinase inhibitor activity//hormone activity//catalytic activity//fatty-acyl-CoA reductase (alcohol-forming) activity//3-beta-hydroxy-delta5-steroid dehydrogenase activity//coenzyme binding//translation release factor activity	GO:0005576//GO:0005634//GO:0018444//GO:0005840	extracellular region//nucleus//translation release factor complex//ribosome	--	--	UP	6.8325	0	blast,frame:-2 start:1421 end:1236|blast,frame:-3 start:1123 end:530
Cluster-6671.6372	7793.28	8624.16	8927	3407.76	3773	3350.05	135.83	137.36	132.16	39.72	41.84	42.61	3834	10535254	PON66060.1	3650	0	Sucrose synthase [Parasponia andersonii]	XM_007204588.1	XM_007204588	2414	0	Prunus persica hypothetical protein (PRUPE_ppa001535mg) mRNA, complete cds	K00695	E2.4.1.13	sucrose synthase	http://www.genome.jp/dbget-bin/www_bget?ko:K00695	P13708	3507	0	Sucrose synthase OS=Glycine max OX=3847 GN=SS PE=1 SV=2	PF00156//PF00862//PF03533	Phosphoribosyl transferase domain//Sucrose synthase//SPO11 homologue	GO:0005985//GO:0005982//GO:0007131//GO:0009116	sucrose metabolic process//starch metabolic process//reciprocal meiotic recombination//nucleoside metabolic process	GO:0003677//GO:0016157	DNA binding//sucrose synthase activity	--	--	--	--	UP	1.6345	2.2379e-166	estscan,start:2756 end:233; minus strand
Cluster-6671.3208	1646.94	1865.04	1887.9	1068	1143.03	948.56	57.76	59.48	56.04	24.88	25.32	24.13	2053	7852968	ONI03552.1	1301	1.7e-140	hypothetical protein PRUPE_6G264400 [Prunus persica]	XM_008241931.1	XM_008241931	799	0	PREDICTED: Prunus mume probable proteasome inhibitor (LOC103338695), mRNA	K06700	PSMF1	proteasome inhibitor subunit 1 (PI31)	http://www.genome.jp/dbget-bin/www_bget?ko:K06700	Q9M330	754	2.1e-78	Probable proteasome inhibitor OS=Arabidopsis thaliana OX=3702 GN=At3g53970 PE=1 SV=1	PF03600	Citrate transporter	GO:0055085	transmembrane transport	--	--	GO:0016021	integral component of membrane	--	--	UP	1.1419	4.3096e-47	blast,frame:3 start:1638 end:1727
Cluster-2681.0	157	145	175	78	78	74	7.69	6.43	7.24	2.53	2.4	2.62	1553	8257858	XP_007222445.2	2321	6.8e-259	LOW QUALITY PROTEIN: pentatricopeptide repeat-containing protein At2g04860 [Prunus persica]	XM_016791999.1	XM_016791999	1414	0	PREDICTED: Prunus mume alpha-amylase (LOC103320333), mRNA	K01176	E3.2.1.1, amyA, malS	alpha-amylase	http://www.genome.jp/dbget-bin/www_bget?ko:K01176	P17859	1515	9e-167	Alpha-amylase OS=Vigna mungo OX=3915 GN=AMY1.1 PE=2 SV=1	PF02324//PF07821//PF00128	Glycosyl hydrolase family 70//Alpha-amylase C-terminal beta-sheet domain//Alpha amylase, catalytic domain	GO:0005985//GO:0009250//GO:0005982//GO:0005975	sucrose metabolic process//glucan biosynthetic process//starch metabolic process//carbohydrate metabolic process	GO:0004556//GO:0046527//GO:0043169//GO:0003824//GO:0005509	alpha-amylase activity//glucosyltransferase activity//cation binding//catalytic activity//calcium ion binding	--	--	--	--	UP	1.4192	3.8988e-11	estscan,start:1 end:1284
Cluster-6671.20378	657	781	879	2	5	5	11.15	12.11	12.67	0.02	0.05	0.06	3930	7865556	ONI16140.1	4048	0	hypothetical protein PRUPE_3G080600 [Prunus persica]	XM_007214861.1	XM_007214861	2266	0	Prunus persica hypothetical protein (PRUPE_ppa001212mg) mRNA, complete cds	K13459	RPS2	disease resistance protein RPS2	http://www.genome.jp/dbget-bin/www_bget?ko:K13459	Q8RXS5	1662	2e-183	Probable disease resistance protein At5g63020 OS=Arabidopsis thaliana OX=3702 GN=At5g63020 PE=2 SV=2	PF00931//PF17001//PF09496//PF01637//PF03623//PF01080//PF05970//PF00861//PF02468//PF13855	NB-ARC domain//Type III secretion basal body protein I, YscI, HrpB, PscI//Cenp-O kinetochore centromere component//Archaeal ATPase//Focal adhesion targeting region//Presenilin//PIF1-like helicase//Ribosomal L18p/L5e family//Photosystem II reaction centre N protein (psbN)//Leucine rich repeat	GO:0006281//GO:0034508//GO:0006412//GO:0007172//GO:0007165//GO:0000723//GO:0015979//GO:0009306//GO:0042254//GO:0006468	DNA repair//centromere complex assembly//translation//signal complex assembly//signal transduction//telomere maintenance//photosynthesis//protein secretion//ribosome biogenesis//protein phosphorylation	GO:0004713//GO:0004871//GO:0005515//GO:0005524//GO:0003678//GO:0003735//GO:0004190//GO:0043531	protein tyrosine kinase activity//signal transducer activity//protein binding//ATP binding//DNA helicase activity//structural constituent of ribosome//aspartic-type endopeptidase activity//ADP binding	GO:0005657//GO:0000776//GO:0016021//GO:0009523//GO:0005622//GO:0009539//GO:0005925//GO:0016020//GO:0005840	replication fork//kinetochore//integral component of membrane//photosystem II//intracellular//photosystem II reaction center//focal adhesion//membrane//ribosome	--	--	UP	7.9559	8.0634e-74	blast,frame:2 start:32 end:2755
Cluster-257.0	17	38	27	0	0	0	0.8	1.62	1.07	0	0	0	1608	7877829	ONI28413.1	749	1.3e-76	hypothetical protein PRUPE_1G141200 [Prunus persica]	XM_008224934.1	XM_008224934	447	0	PREDICTED: Prunus mume aspartic proteinase nepenthesin-2-like (LOC103322977), mRNA	--	--	--	--	Q3EBM5	252	2.6e-20	Probable aspartic protease At2g35615 OS=Arabidopsis thaliana OX=3702 GN=At2g35615 PE=3 SV=1	PF00026	Eukaryotic aspartyl protease	GO:0006508	proteolysis	GO:0004190	aspartic-type endopeptidase activity	--	--	--	--	UP	7.5719	4.844e-08	estscan,start:1608 end:123; minus strand
Cluster-6671.1138	192	249	216	3	1	3	10.61	12.44	10.06	0.11	0.03	0.12	1410	--	--	--	--	--	XM_016792739.1	XM_016792739	332	2.28705e-171	PREDICTED: Prunus mume uncharacterized mitochondrial protein AtMg00810-like (LOC107880674), mRNA	--	--	--	--	Q94HW2	377	7.4e-35	Retrovirus-related Pol polyprotein from transposon RE1 OS=Arabidopsis thaliana OX=3702 GN=RE1 PE=2 SV=1	PF00619	Caspase recruitment domain	GO:0042981	regulation of apoptotic process	--	--	--	--	--	--	UP	6.9188	1.7335e-31	estscan,start:1216 end:193; minus strand
Cluster-6671.20009	5	11	11	0	1	1	0.82	1.58	1.49	0	0.1	0.11	667	7807014	OMO84418.1	182	3.1e-11	hypothetical protein COLO4_22084 [Corchorus olitorius]	XM_008243449.2	XM_008243449	94	2.11827e-39	PREDICTED: Prunus mume random slug protein 5 (LOC103340084), mRNA	--	--	--	--	--	--	--	--	PF05392	Cytochrome C oxidase chain VIIB	GO:0015992//GO:0006123	proton transport//mitochondrial electron transport, cytochrome c to oxygen	GO:0004129	cytochrome-c oxidase activity	GO:0045277//GO:0005746	respiratory chain complex IV//mitochondrial respiratory chain	--	--	UP	4.1064	0.0082434	blast,frame:1 start:364 end:630
Cluster-2940.0	1	1	0	66	61	42	0.07	0.06	0	3.04	2.66	2.11	1173	--	--	--	--	--	FO905645.1	FO905645	241	7.30695e-121	Leptosphaeria biglobosa brassicae b35_scaffold00019 complete sequence	--	--	--	--	P42327	402	7.8e-38	Alcohol dehydrogenase OS=Geobacillus stearothermophilus OX=1422 GN=adh PE=1 SV=1	PF02737//PF01408//PF08240//PF00107//PF02826	3-hydroxyacyl-CoA dehydrogenase, NAD binding domain//Oxidoreductase family, NAD-binding Rossmann fold//Alcohol dehydrogenase GroES-like domain//Zinc-binding dehydrogenase//D-isomer specific 2-hydroxyacid dehydrogenase, NAD binding domain	GO:0006574//GO:0006554//GO:0006631//GO:0018874//GO:0006550//GO:0055114//GO:0006568//GO:0006633//GO:0006552	valine catabolic process//lysine catabolic process//fatty acid metabolic process//benzoate metabolic process//isoleucine catabolic process//oxidation-reduction process//tryptophan metabolic process//fatty acid biosynthetic process//leucine catabolic process	GO:0003857//GO:0016491//GO:0051287	3-hydroxyacyl-CoA dehydrogenase activity//oxidoreductase activity//NAD binding	--	--	KOG0023	Alcohol dehydrogenase, class V	DOWN	-6.0253	3.4495e-07	blast,frame:-3 start:1171 end:107
Cluster-2269.0	0	0	0	20	12	9	0	0	0	0.81	0.46	0.4	1297	--	--	--	--	--	XM_001804515.1	XM_001804515	592	0	Phaeosphaeria nodorum SN15 hypothetical protein partial mRNA	K01915	glnA, GLUL	glutamine synthetase	http://www.genome.jp/dbget-bin/www_bget?ko:K01915	Q96V52	1339	1.9e-146	Glutamine synthetase OS=Emericella nidulans (strain FGSC A4 / ATCC 38163 / CBS 112.46 / NRRL 194 / M139) OX=227321 GN=glnA PE=3 SV=3	PF02017//PF00120//PF03951	CIDE-N domain//Glutamine synthetase, catalytic domain//Glutamine synthetase, beta-Grasp domain	GO:0009252//GO:0006542//GO:0006807//GO:0006915	peptidoglycan biosynthetic process//glutamine biosynthetic process//nitrogen compound metabolic process//apoptotic process	GO:0004356	glutamate-ammonia ligase activity	GO:0005622	intracellular	KOG0683	Glutamine synthetase	DOWN	-5.8459	0.00027353	estscan,start:1297 end:8; minus strand
Cluster-4585.0	1	2	0	51	45	30	0.1	0.17	0	3.16	2.64	2.03	941	8276231	XP_007200170.2	943	2.5e-99	protein DMR6-LIKE OXYGENASE 2 [Prunus persica]	XM_008239614.2	XM_008239614	684	0	PREDICTED: Prunus mume protein DMR6-LIKE OXYGENASE 1-like (LOC103336559), mRNA	--	--	--	--	Q9FFF6	259	2.4e-21	Probable 2-oxoglutarate-dependent dioxygenase At5g05600 OS=Arabidopsis thaliana OX=3702 GN=At5g05600 PE=2 SV=1	PF02285//PF03171	Cytochrome oxidase c subunit VIII//2OG-Fe(II) oxygenase superfamily	GO:0055114//GO:0015992//GO:0006123	oxidation-reduction process//proton transport//mitochondrial electron transport, cytochrome c to oxygen	GO:0004129//GO:0016491	cytochrome-c oxidase activity//oxidoreductase activity	GO:0045277	respiratory chain complex IV	--	--	DOWN	-5.0154	1.1024e-06	blast,frame:3 start:3 end:542
Cluster-8492.0	0	0	0	4	9	8	0	0	0	0.57	1.21	1.25	558	--	--	--	--	--	XM_007224784.1	XM_007224784	354	0	Prunus persica hypothetical protein (PRUPE_ppa023081mg) mRNA, complete cds	--	--	--	--	--	--	--	--	PF00452	Apoptosis regulator proteins, Bcl-2 family	GO:0042981	regulation of apoptotic process	--	--	--	--	--	--	DOWN	-4.8771	0.011514	blast,frame:-2 start:548 end:3
Cluster-9048.0	3	0	0	30	33	21	0.19	0	0	1.25	1.31	0.96	1266	--	--	--	--	--	XM_016792674.1	XM_016792674	1013	0	PREDICTED: Prunus mume senescence-specific cysteine protease SAG39-like (LOC107880649), mRNA	K16292	CEP, CYSEP	KDEL-tailed cysteine endopeptidase	http://www.genome.jp/dbget-bin/www_bget?ko:K16292	A2XQE8	1008	4.5e-108	Senescence-specific cysteine protease SAG39 OS=Oryza sativa subsp. indica OX=39946 GN=OsI_14861 PE=3 SV=1	PF03051//PF00112	Peptidase C1-like family//Papain family cysteine protease	GO:0006508	proteolysis	GO:0008234//GO:0004197	cysteine-type peptidase activity//cysteine-type endopeptidase activity	--	--	--	--	DOWN	-4.4114	6.7824e-05	blast,frame:3 start:57 end:1091
