# Supplementary material for: Transcriptomic analysis reveals candidate genes for male sterility in Prunus sibirica
Source: PeerJ. 2021 Oct 20;9:e12349. doi: 10.7717/peerj.12349 (PMC8541319; doi:10.7717/peerj.12349)
Supplement: Supplemental Information 13 [file peerj-09-12349-s013.xls]

## Sheet: Sheet1
Table S10 The Ct value of sample
Raw data of Ct value
	Target gene	Reference Gene
	Ct value	Ct value
	Cluster-10585.0	18SrRNA
CK1	27.912	16.151
CK2	30.476	16.399
CK3	30.872	16.231
T1	32.406	15.57
T2	32.479	14.622
T3	31.766	14.87
	Cluster-6671.20011	18SrRNA
CK1	21.55	16.151
CK2	23.928	16.399
CK3	23.59	16.231
T1	28.922	15.57
T2	28.664	14.622
T3	29.047	14.87
	Cluster-6671.6372	18SrRNA
CK1	19.995	16.151
CK2	21.975	16.399
CK3	23.302	16.231
T1	22.891	15.57
T2	22.872	14.622
T3	22.548	14.87
	Cluster-6671.3208	18SrRNA
CK1	30.374	16.151
CK2	30.403	16.399
CK3	31.755	16.231
T1	32.432	15.57
T2	32.486	14.622
T3	32.36	14.87
	Cluster-2681.0	18SrRNA
CK1	27.022	16.151
CK2	28.817	16.399
CK3	29.884	16.231
T1	28.532	15.57
T2	29.333	14.622
T3	29.218	14.87
	Cluster-6671.20378	18SrRNA
CK1	29.398	16.151
CK2	31.712	16.399
CK3	29.928	16.231
T1	34.684	15.57
T2	34.288	14.622
T3	33.934	14.87
	Cluster-257.0	18SrRNA
CK1	29.561	16.151
CK2	31.289	16.399
CK3	30.752	16.231
T1	36.763	15.57
T2	36.317	14.622
T3	35.058	14.87
	Cluster-6671.1138	18SrRNA
CK1	26.533	16.151
CK2	26.999	16.399
CK3	26.958	16.231
T1	29.925	15.57
T2	30.02	14.622
T3	29.533	14.87
	Cluster-6671.20009	18SrRNA
CK1	29.573	16.151
CK2	30.409	16.399
CK3	30.844	16.231
T1	32.513	15.57
T2	31.221	14.622
T3	31.905	14.87
	Cluster-2940.0	18SrRNA
CK1	34.165	16.003
CK2	33.348	15.66
CK3	33.555	14.87
T1	29.802	16.83
T2	30.277	16.28
T3	29.279	16.534
	Cluster-2269.0	18SrRNA
CK1	37.36	16.003
CK2	37.127	15.66
CK3	35.941	14.87
T1	32.744	16.83
T2	32.636	16.28
T3	33.03	16.534
	Cluster-4585.0	18SrRNA
CK1	34.841	16.003
CK2	33.084	15.66
CK3	35.116	14.87
T1	28.865	16.83
T2	30.279	16.28
T3	27.457	16.534
	Cluster-8492.0	18SrRNA
CK1	36.426	16.003
CK2	34.995	15.66
CK3	36.406	14.87
T1	30.943	16.83
T2	32.031	16.28
T3	29.829	16.534
	Cluster-9048.0	18SrRNA
CK1	36.013	16.003
CK2	34.58	15.66
CK3	34.041	14.87
T1	30.537	16.83
T2	31.627	16.28
T3	31.376	16.534
Processed data of Ct value
Gene name	Log2FoldChange (qRT-PCR)	SD	Log2FoldChange(Transcriptome sequencing)
Cluster-10585.0	3.703	0.392	6.7714
Cluster-6671.20011	7.095	0.195	6.8325
Cluster-6671.6372	2.253	0.193	1.6345
Cluster-6671.3208	2.822	0.063	1.1419
Cluster-2681.0	1.693	0.433	1.4192
Cluster-6671.20378	5.196	0.375	7.9559
Cluster-257.0	6.752	0.884	7.5719
Cluster-6671.1138	4.236	0.258	6.9188
Cluster-6671.20009	2.844	0.646	4.1064
Cluster-2940.0	-4.94	0.499	-6.0253
Cluster-2269.0	-5.043	0.204	-5.8459
Cluster-4585.0	-6.517	1.411	-5.0154
Cluster-8492.0	-6.045	1.101	-4.8771
Cluster-9048.0	-4.735	0.571	-4.4114
